# Supplementary material for: Access to densely functionalized spirocyclopentenonyl oxindole frameworks via aza- and carbo-Piancatelli rearrangement
Source: Royal Society of Chemistry journal article supplement (doi:10.1039/d2ob00883a), 2022-01-01

## Supporting Information

### Access to Densely Functionalized Spirocyclopentenonyl Oxindole Frameworks via Aza- and Carbo-Piancatelli Rearrangement

*Sourav Pramanik,<sup>a</sup> Chenna Jagadeesh,<sup>a</sup> Ayan Chatterjee,<sup>a</sup> Subhas Chandra Debnath,<sup>b</sup> and Jaideep  
Saha<sup>\*a</sup>*

*<sup>a</sup>Department of Biological and Synthetic Chemistry, Centre of Biomedical Research (CBMR),  
SGPGIMS Campus. Raebareli Road, Lucknow 226014, Uttar Pradesh, India.*

[Jaideep.saha@cbmr.res.in](mailto:Jaideep.saha@cbmr.res.in); [jdsaha2000@gmail.com](mailto:jdsaha2000@gmail.com)

*<sup>a</sup>Department of Chemistry, University of Kalyani, Kalyani, Nadia, West Bengal 741235, India.*

## Table of Contents

|                                                                 |         |
|-----------------------------------------------------------------|---------|
| 1. General experimental.....                                    | S2      |
| 2. Starting material synthesis and characterization.....        | S3-S8   |
| 3. General procedure and characterization of new compounds..... | S9-S35  |
| 4. Stereochemical assignment of compound 31.....                | S36     |
| 5. NMR spectra of the new compounds.....                        | S37-S85 |

**1. General Information.** Unless otherwise mentioned, all reactions in the current study were performed under nitrogen or argon atmosphere. Standard protocols were followed for drying the laboratory solvents. All reagents/catalysts were purchased commercially and used without any further purification. 1,1,1,3,3,3-hexafluoro-2-propanol (HFIP) was purchased from Spectrochem, India and used directly in the reaction. Reactions were monitored by TLC, using Merck silica gel 60 F 254 plates. TLC plates were visualized using either with UV light (254 nm) or using stains such as 10% ethanolic phosphomolybdic acid (PMA) or 1% aqueous  $\text{KMnO}_4$  or iodine. Flash column chromatography was performed using silica gel (230-400 mesh).  $^1\text{H}$  and  $^{13}\text{C}$  NMR spectra were recorded on Avance III, Bruker 400 MHz and 100 MHz spectrometers respectively using  $\text{CDCl}_3$  or  $\text{DMSO-d}_6$ .  $^1\text{H}$  NMR chemical shift are expressed in ppm ( $\delta$ ) relative to  $\delta = 7.26$  for  $\text{CDCl}_3$  and  $\delta = 2.50$  for  $\text{DMSO-d}_6$ .  $^{13}\text{C}$  NMR chemical shift are expressed in ppm ( $\delta$ ) relative to  $\delta = 77.16$  for  $\text{CDCl}_3$  and  $\delta = 39.51$  for  $\text{DMSO-d}_6$  resonance. HRMS and Electron Spray Ionization (ESI) ( $m/z$ ) spectra were recorded on Agilent Technologies 6530 Accurate-Mass Q-TOF LC/MS. Compound **1a** is known in the literature.<sup>10</sup> Compounds **1b-1i** were prepared following the same procedure.

## 2. List of the starting materials.

Following furan-2-yl-3-hydroxyindolin-2-one starting materials were prepared from isatin derivatives as illustrated in Scheme S1 and structure of the products are provided in Figure S1.

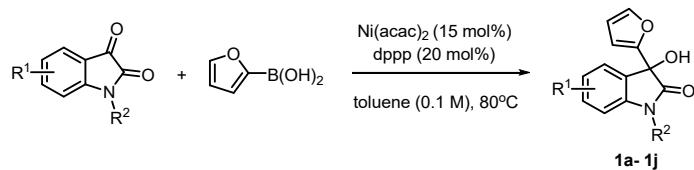

**Scheme S1.** Ni-catalyzed method for the preparation of furanyl-3-hydroxyindolinones

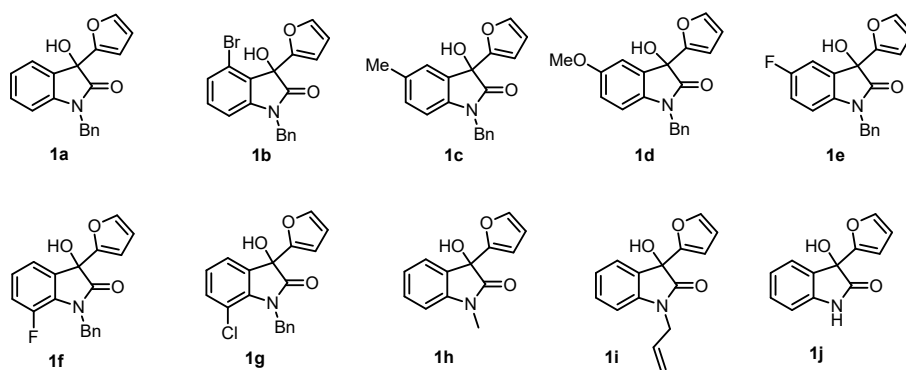

**Figure S1.** List of furanyl-3-hydroxyindolinones prepared in the study.

## Anilines:

Following commercially available anilines (**2a-2y**) were used in the present study.

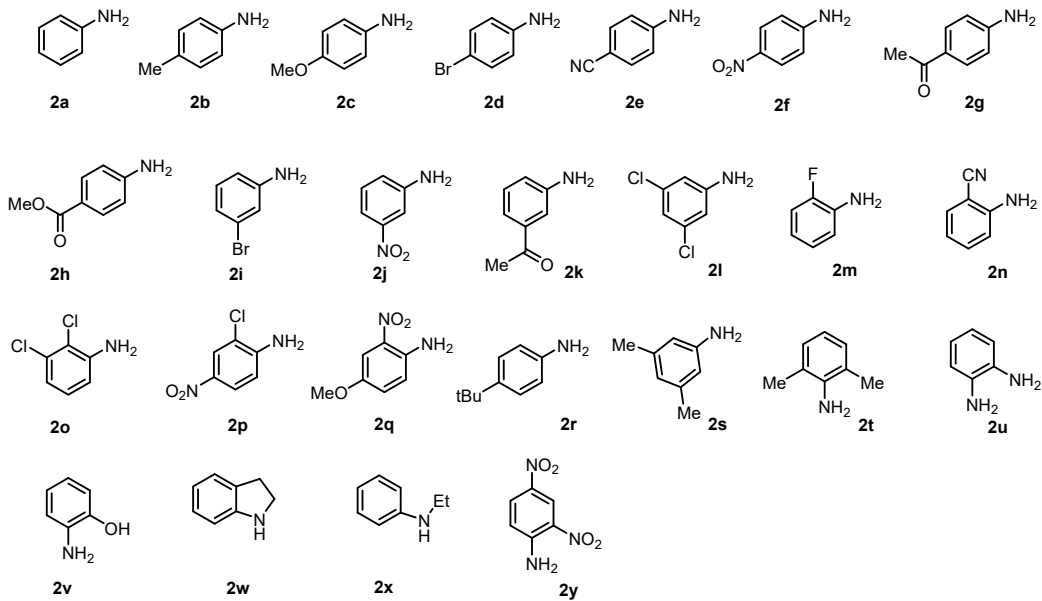

**Figure S2.** List of anilines.

**Indoles:** Following indole derivatives were used (**29a-29f**) were used in the present study.

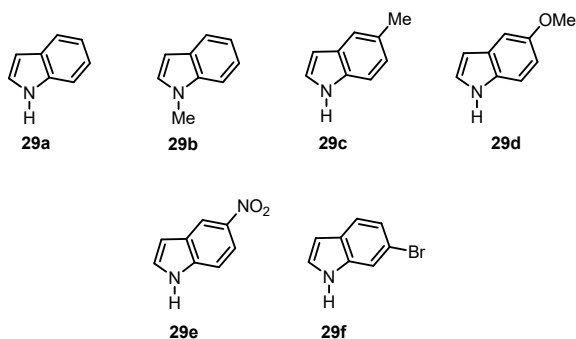

**Figure S3.** List of indoles.

**General procedure for the preparation of furan-2-yl-3-hydroxyindolin-2-ones (1).**<sup>1</sup> N-protected isatin derivatives (0.2 mmol) and furylboronic acid (0.4 mmol) were taken in dry toluene (2.0 mL) and were successively added Ni(acac)<sub>2</sub> (15 mol%) and 1,3-bis(diphenylphosphino)propane [dppp] (20 mol%) under N<sub>2</sub> atmosphere. The reaction was heated at 80 °C. After completion of the reaction (TLC monitored), solvent was removed under reduced pressure and the crude residue was purified by silica gel column chromatography (EtOAc-Hex as eluent) to afford the desired product.

**1-Benzyl-4-bromo-3-(furan-2-yl)-3-hydroxyindolin-2-one (1b).**

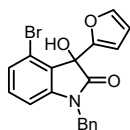

Following the general procedure, N-benzyl-4-bromoisatin (0.79 g, 2.50 mmol) was transformed into compound **1b** which was isolated as brown solid in 76% (0.73 g) yield. *R<sub>f</sub>* 0.3 (EtOAc: Hexane 4:6); <sup>1</sup>H NMR (400 MHz, CDCl<sub>3</sub>) δ 7.41 (s, 1H), 7.32 - 7.26 (m, 6H), 7.18 (d, *J* = 8.2 Hz, 1H), 7.10 (t, *J* = 7.8 Hz, 1H), 6.67 (d, *J* = 7.7 Hz, 1H), 6.52 (s, 1H), 6.40 (s, 1H), 5.00 (d, *J* = 15.9 Hz, 1H), 4.81 (d, *J* = 15.9 Hz, 1H), 3.80 (s, 1H); <sup>13</sup>C{<sup>1</sup>H} NMR (100 MHz, CDCl<sub>3</sub>) δ 174.3, 149.9, 144.9, 143.5, 134.8, 131.7, 129.1, 128.0, 127.6, 127.3, 127.1, 120.4, 110.8, 109.5, 109.0, 75.8, 44.2; HRMS(ESI-TOF) *m/z*: [M + Na]<sup>+</sup> C<sub>19</sub>H<sub>14</sub>BrNNaO<sub>3</sub> calcd. 406.0055, found, 406.0061.

**1-Benzyl-3-(furan-2-yl)-3-hydroxy-5-methylindolin-2-one (1c).**

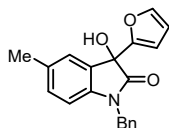

Following the general procedure, N-benzyl-5-methylisatin (0.17 g, 0.68 mmol) was transformed into compound **1c** which was isolated as white solid in 64% (0.14 g) yield. *R<sub>f</sub>* 0.35 (EtOAc: Hexane 3:7); <sup>1</sup>H NMR (400 MHz, CDCl<sub>3</sub>) δ 7.38 - 7.32 (m, 2H), 7.25 - 7.17 (m, 5H), 6.95 (d, *J* = 7.8 Hz, 1H), 6.53 (d, *J* = 8.0 Hz, 1H), 6.35 - 6.35 (m, 1H), 6.27-6.25 (m, 1H), 4.92 (d, *J* = 15.8 Hz, 1H), 4.72 (d, *J* = 15.8 Hz, 1H), 4.44 (s, 1H), 2.23 (s, 3H); <sup>13</sup>C{<sup>1</sup>H} NMR (100 MHz, CDCl<sub>3</sub>) δ 175.5, 151.8, 143.8, 140.1, 135.3, 133.1, 130.4, 128.8, 128.6, 127.7, 127.1, 126.2, 110.4, 109.6, 108.8,

73.9, 43.9, 21.1; **HRMS(ESI-TOF)**  $m/z$ :  $[M + Na]^+$   $C_{20}H_{17}NNaO_3$  calcd. 342.1106, found, 342.1146.

**1-Benzyl-3-(furan-2-yl)-3-hydroxy-5-methoxyindolin-2-one (1d).**

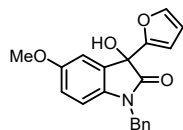

Following the general procedure N-benzyl-5-methoxyisatin (0.25g, 0.94 mmol) was transformed into compound **1d** which was isolated as brown solid in 60% (0.19 g) yield.  $R_f$  0.35 (EtOAc: Hexane 3:7);  **$^1H$  NMR** (400 MHz,  $CDCl_3$ )  $\delta$  7.41-7.10 (m, 1H), 7.28 - 7.19 (m, 5H), 7.16 (d,  $J$  = 2.6 Hz, 1H), 6.72-6.70 (m, 1H), 6.57 (d,  $J$  = 8.6 Hz, 1H), 6.36 - 6.35 (m, 1H), 6.30 - 6.29 (m, 1H), 4.95 (d,  $J$  = 15.8 Hz, 1H), 4.76 (d,  $J$  = 15.8 Hz, 1H), 4.11 (s, 1H), 3.72 (s, 3H);  **$^{13}C\{^1H\}$  NMR** (100 MHz,  $CDCl_3$ )  $\delta$  175.3, 156.6, 151.5, 144.0, 135.9, 135.3, 129.6, 129.0, 127.8, 127.2, 115.2, 112.3, 110.5, 110.5, 109.0, 74.1, 55.9, 44.1; **HRMS(ESI-TOF)**  $m/z$ :  $[M + Na]^+$   $C_{20}H_{17}NNaO_4$  calcd. 358.1055, found, 358.1086.

**1-Benzyl-5-fluoro-3-(furan-2-yl)-3-hydroxyindolin-2-one (1e).**

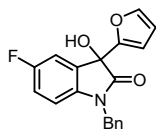

Following the general procedure N-benzyl-5-fluoroisatin (0.17 g, 0.67mmol) was transformed into compound **1e** which was isolated as red solid in 61% (0.13 g) yield.  $R_f$  0.5 (EtOAc: Hexane 3:7);  **$^1H$  NMR** (400 MHz,  $CDCl_3$ )  $\delta$  7.45 - 7.26 (m, 7H), 6.91 (s, 1H), 6.62 (s, 1H), 6.38 (d,  $J$  = 28.5 Hz, 2H), 5.01- 4.79 (m, 2H), 4.27 (s, 1H);  **$^{13}C\{^1H\}$  NMR** (100 MHz,  $CDCl_3$ )  $\delta$  175.4, 160.8, 158.4, 150.9, 144.2, 138.4, 134.9, 130.1, 130.0, 129.1, 128.0, 127.2, 116.7, 116.4, 113.9, 113.7, 110.6, 110.6, 109.2, 73.8, 44.2; **HRMS(ESI-TOF)**  $m/z$ :  $[M + Na]^+$   $C_{19}H_{14}FNNaO_3$  calcd. 346.0855, found, 346.0903.

### 1-Benzyl-7-fluoro-3-(furan-2-yl)-3-hydroxyindolin-2-one (1f).

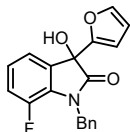

Following the general procedure N-benzyl-7-fluoroisatin (0.17g, 0.67mmol) was transformed into compound **1f** which was isolated as brown solid in 66% (0.143g) yield.  $R_f$  0.4 (EtOAc: Hexane 3:7);  $^1\text{H NMR}$  (400 MHz,  $\text{CDCl}_3$ )  $\delta$  7.39 -7.39 (m, 1H), 7.33 (dd,  $J = 6.9, 1.4$  Hz, 1H), 7.26 - 7.20 (m, 5H), 7.02 - 6.93 (m, 2H), 6.32-6.32 (m, 1H), 6.29-6.27 (m, 1H), 5.06 - 4.96 (m, 2H), 4.18 (s, 1H);  $^{13}\text{C}\{^1\text{H}\}$  NMR (100 MHz,  $\text{CDCl}_3$ )  $\delta$  175.2, 151.0, 148.86, 146.4, 144.2, 136.4, 131.2, 128.8, 127.8, 127.4, 124.4, 124.3, 121.5, 118.5, 118.3, 110.6, 109.2, 73.7, 45.7; **HRMS(ESI-TOF)**  $m/z$ :  $[\text{M} + \text{Na}]^+$   $\text{C}_{19}\text{H}_{14}\text{FNNaO}_3$  calcd. 346.0855, found, 346.0891.

### 1-Benzyl-7-chloro-3-(furan-2-yl)-3-hydroxyindolin-2-one (1g).

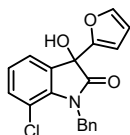

Following the general procedure N-benzyl-7-chloroisatin (0.170g, 0.63 mmol) was transformed into compound **1g** which was isolated as red solid in 68% (0.14g) yield.  $R_f$  0.35 (EtOAc: Hexane 3:7);  $^1\text{H NMR}$  (400 MHz,  $\text{CDCl}_3$ )  $\delta$  7.47-7.45 (m, 1H), 7.37-7.37 (m, 1H), 7.26 - 7.14 (m, 6H), 6.97 (t,  $J = 7.8$  Hz, 1H), 6.34 - 6.34(m, 1H), 6.27-6.26 (m, 1H), 5.30 (s, 2H), 4.72 (s, 1H);  $^{13}\text{C}\{^1\text{H}\}$  NMR (100 MHz,  $\text{CDCl}_3$ )  $\delta$  176.2, 151.0, 144.0, 138.6, 136.9, 132.6, 131.5, 128.7, 127.3, 126.3, 124.5, 124.3, 116.0, 110.5, 109.2, 73.2, 45.1; **HRMS(ESI-TOF)**  $m/z$ :  $[\text{M} + \text{Na}]^+$   $\text{C}_{19}\text{H}_{14}\text{ClNaO}_3$  calcd. 362.0560, found, 362.0564.

### 3-(Furan-2-yl)-3-hydroxy-1-methylindolin-2-one (1h).

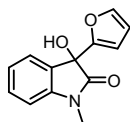

Following the general procedure N-methylisatin (0.08 g, 0.49 mmol) was transformed into compound **1h** which was isolated as brown solid in 48% (0.055g) yield.  $R_f$  0.35 (EtOAc: Hexane 3:7);  $^1\text{H NMR}$  (400 MHz,  $\text{CDCl}_3$ )  $\delta$  7.57 (d,  $J = 7.3$  Hz, 1H), 7.42 (s, 1H), 7.37 (t,  $J = 7.7$  Hz, 1H), 7.13 (t,  $J = 7.5$  Hz, 1H), 6.86 (d,  $J = 7.8$  Hz, 1H), 6.31 (s, 2H), 3.96 (s, 1H), 3.21 (s, 3H);  $^{13}\text{C}\{^1\text{H}\}$  NMR (100 MHz,  $\text{CDCl}_3$ )  $\delta$  175.3, 151.4, 144.0, 143.6, 130.4, 128.4, 125.5, 123.5, 110.5, 109.1, 108.8, 73.6, 26.6; HRMS(ESI-TOF)  $m/z$ :  $[\text{M} + \text{Na}]^+$   $\text{C}_{13}\text{H}_{11}\text{NNaO}_3$  calcd. 252.0637, found, 252.0666.

### 1-Allyl-3-(furan-2-yl)-3-hydroxyindolin-2-one (**1i**).

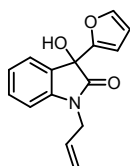

Following the general procedure N-allyl isatin (0.20g, 1.07 mmol) was transformed into compound **1i** which was isolated as yellow solid in 59% (0.16g) yield.  $R_f$  0.4 (EtOAc: Hexane 3:7);  $^1\text{H NMR}$  (400 MHz,  $\text{CDCl}_3$ )  $\delta$  7.52 (d,  $J = 7.4$  Hz, 1H), 7.35 (s, 1H), 7.26 (t,  $J = 7.7$  Hz, 1H), 7.06 (t,  $J = 7.5$  Hz, 1H), 6.79 (d,  $J = 7.8$  Hz, 1H), 6.29 (m, 1H), 6.25-6.24 (m, 1H), 5.81- 5.72 (m, 1H), 5.18 - 5.13 (m, 2H), 4.41 (s, 1H), 4.35 (dd,  $J = 16.4, 4.9$  Hz, 1H), 4.19 (dd,  $J = 16.4, 4.9$  Hz, 1H);  $^{13}\text{C}\{^1\text{H}\}$  NMR (100 MHz,  $\text{CDCl}_3$ )  $\delta$  175.1, 151.5, 143.8, 142.6, 130.8, 130.1, 128.6, 125.5, 123.4, 117.7, 110.4, 109.6, 108.8, 73.6, 42.5; HRMS(ESI-TOF)  $m/z$ :  $[\text{M} + \text{Na}]^+$   $\text{C}_{15}\text{H}_{13}\text{NNaO}_3$  calcd. 278.0793, found, 278.0832.

#### Reference:

1. Y. -Y. Zhang, H. Chen, X. Jiang, H. Liang, X. He, Y. Zhang, X. Chen, W. He, Y. Li and L. Qiu, *Tetrahedron*, 2018, **74**, 2245-2250



### 3. General procedure for *aza*-Piancatelli rearrangement.

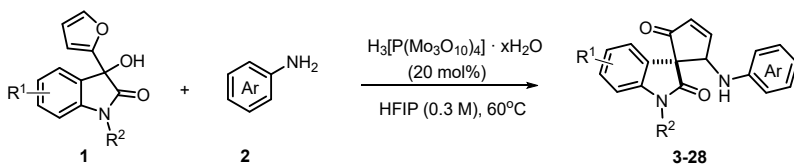

To a solution of compound **1** (1.0 equiv) and aniline (**2**, 2.0 equiv) in HFIP (0.3M), was added phosphomolybdic acid (20 mol%). The reaction mixture was stirred at 60 °C (sealed tube was used) and the progress of the reaction was monitored by TLC. After completion of the reaction (*ca.* 24 h), HFIP was removed under the reduced pressure. The crude was diluted with ethyl acetate and washed with water and brine (10 mL x 3). The combined organic layer was then dried over anhydrous Na<sub>2</sub>SO<sub>4</sub> and filtered. The solvent was removed under *vacuo* and crude residue was purified by silica gel column chromatography to obtain spirocyclic oxindoles **3**, **5-28**.

#### 4. Characterization data of the compounds (3-28)

##### 1'-Benzyl-5-(phenylamino)spiro[cyclopentane-1,3'-indolin]-3-ene-2,2'-dione (3).

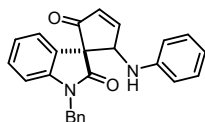

Following the general procedure, reaction of compound **1a** (0.035g, 0.11 mmol, 1.0 equiv) and aniline (0.022g, 0.23 mmol, 2.0 equiv) in presence of PMA (0.04 g, 0.02 mmol) delivered compound **3**, which was purified by silica gel chromatography (7:3 Hexane: EtOAc) to furnish the title compound in 71% (0.031g) yield as an inseparable mixture of diastereomers (1:1).  $R_f$  0.4 (EtOAc: Hexane 3:7);  $^1\text{H NMR}$  (800 MHz,  $\text{CDCl}_3$ )  $\delta$  7.96 (dd,  $J = 5.4, 1.5$  Hz, 1H), 7.51 (s, 1H), 7.43 (t,  $J = 7.7$  Hz, 1.67H), 7.30 - 7.22 (m, 8H), 7.16 - 7.13 (m, 4H), 7.11 - 7.07 (m, 4H), 7.04 - 7.00 (m, 3H), 6.98 - 6.93 (m, 3H), 6.78 (d,  $J = 7.2$  Hz, 0.72H), 6.76 (d,  $J = 7.4$  Hz, 1.79H), 6.66 (t,  $J = 7.1$  Hz, 0.86H), 6.56-6.53 (m, 3.57H), 6.50 (d,  $J = 7.7$  Hz, 0.86H), 6.38 (d,  $J = 7.9$  Hz, 1.71H), 5.94 (s, 0.62H), 5.46 (s, 1H), 5.38 (d,  $J = 11.3$  Hz, 1H), 5.09 (d,  $J = 12.0$  Hz, 0.83H), 4.99 (d,  $J = 16.2$  Hz, 1H), 4.89 (d,  $J = 15.9$  Hz, 1.26H), 4.84 (d,  $J = 15.9$  Hz, 1.1H), 4.59 (d,  $J = 16.2$  Hz, 1H);  $^{13}\text{C}\{^1\text{H}\}$  NMR (200 MHz,  $\text{CDCl}_3$ )  $\delta$  200.2, 194.9, 174.4, 172.6, 169.7, 164.1, 145.6, 145.4, 144.5, 143.7, 138.8, 135.1, 135.0, 134.6, 129.8, 129.6, 129.4, 129.2, 129.0, 128.9, 127.6, 127.3, 127.1, 126.6, 125.6, 125.3, 123.4, 123.1, 122.7, 122.0, 121.1, 120.3, 119.2, 115.1, 114.2, 110.3, 110.1, 101.8, 66.8, 65.7, 61.8, 61.1, 44.2, 44.1. HRMS(ESI-TOF)  $m/z$ :  $[\text{M} + \text{Na}]^+$   $\text{C}_{25}\text{H}_{20}\text{N}_2\text{NaO}_2$  calcd. 403.1422, found, 403.1419.

##### 1'-Benzyl-2-((4-methoxyphenyl)amino)spiro[cyclopentane-1,3'-indolin]-3-ene-2',5-dione (5).

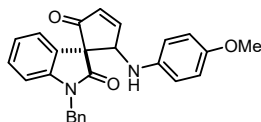

Following the general procedure, reaction of compound **1a** (0.04 g, 0.13 mmol, 1.0 equiv) and 4-methoxyaniline **2c** (0.033 g, 0.26 mmol, 2.0 equiv) in presence of PMA (0.048 g, 0.03 mmol) delivered compound **5**, which was purified by silica gel column chromatography (7:3 Hexane: EtOAc) to furnish the title compound (brown semi solid) in 52% (0.028 g) yield as an inseparable mixture of diastereomers (2:1 *dr*).  $R_f$  0.3 (EtOAc: Hexane 3:7);  $^1\text{H NMR}$  (400 MHz,  $\text{CDCl}_3$ )  $\delta$  7.57 (d,  $J = 54.1$  Hz, 1H), 7.26 - 7.21 (m, 4H), 7.18-7.17 (m, 2H), 7.13 - 7.08 (m, 3H), 7.02-6.88 (m, 4H), 6.75 (d,  $J = 7.2$  Hz, 1H), 6.56 (t,  $J = 8.0$  Hz, 2H), 6.50 (d,  $J = 7.6$  Hz, 1H), 6.44 (d,  $J = 8.6$  Hz, 0.86H), 6.38 (d,  $J = 8.5$  Hz, 1H), 5.71 (d,  $J = 24.1$  Hz, 1H), 5.47 (brs, 0.52H), 5.25 (d,  $J = 11.7$  Hz, 0.43H), 4.97 (d,  $J = 16.2$  Hz, 1H), 4.89 (d,  $J = 12.5$  Hz, 0.51H), 4.60 (dd,  $J = 26.2, 16.1$  Hz, 1H), 3.84 (s, 3H), 3.69 (s, 1.37H).  $^{13}\text{C}\{^1\text{H}\}$  NMR (100 MHz,  $\text{CDCl}_3$ )  $\delta$  194.9, 194.6, 175.7, 172.7, 171.0, 170.6, 157.6, 154.0, 153.7, 144.6, 143.7, 139.3, 139.0, 135.2, 131.8, 131.7, 129.1, 128.8, 128.7, 127.4, 127.3, 126.7(2), 125.9, 123.2, 123.0, 122.6, 117.3, 116.5, 115.0, 114.9(2), 110.3, 110.0, 100.6, 99.8, 66.1, 65.6, 62.4, 61.9, 55.7, 55.6, 44.1, 44.0; HRMS(ESI-TOF)  $m/z$ :  $[\text{M} + \text{H}]^+$   $\text{C}_{26}\text{H}_{23}\text{N}_2\text{O}_3$  calcd. 411.1709, found, 411.1692.

**1'-Benzyl-2-((4-bromophenyl)amino)spiro[cyclopentane-1,3'-indolin]-3-ene-2',5-dione (6).**

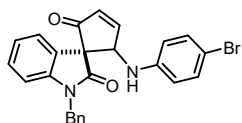

Following the general procedure, reaction of compound **1a** (0.04 g, 0.13 mmol, 1.0 equiv) and 4-bromoaniline **2d** (0.045 g, 0.26 mmol, 2.0 equiv) furnished spirooxindole **6**, which was purified by silica gel column chromatography (7:3 Hex: EtOAc) to afford the title compound (brown solid) in 53% (0.032 g) yield as inseparable mixture of diastereomers (*dr n.d.*).  $R_f$  0.4 (EtOAc: Hexane 3:7); mp. 117-120 °C.  $^1\text{H NMR}$  (400 MHz,  $\text{CDCl}_3$ )  $\delta$  7.86 (m, 1H), 7.47 (d,  $J = 9.5$  Hz, 0.53H), 7.26 - 7.23 (m, 2.50H), 7.15 (d,  $J = 7.0$  Hz, 5H), 7.08 - 7.04 (m, 3H), 6.98-6.96 (m, 1.52H), 6.81 (d,  $J = 5.4$  Hz, 1.33H), 6.57 (d,  $J = 6.9$  Hz, 1H), 6.50-6.49 (m, 1.32H), 6.26 (d,  $J = 7.8$  Hz, 1.44H), 6.20 (d,  $J = 7.8$  Hz, 0.72H), 5.33 (d,  $J = 5.7$  Hz, 0.34 H), 5.20 (d,  $J = 10.7$  Hz, 0.72H), 4.89 (dt,  $J = 31.8, 14.5$  Hz, 2.74H), 4.55 (d,  $J = 16.1$  Hz, 0.84H), 4.11 (d,  $J = 9.2$  Hz, 0.56H);  $^{13}\text{C}\{^1\text{H}\}$  NMR (100 MHz,  $\text{CDCl}_3$ )  $\delta$  200.3, 200.0, 174.3, 171.4, 163.6, 144.8, 144.5, 144.4, 143.7, 135.0, 134.7(2), 132.2, 132.1, 129.3(2), 129.0, 128.9, 128.8, 127.8, 127.6, 127.1, 126.6, 123.6, 123.2, 122.7, 122.0,

115.8, 115.5, 110.9, 110.3, 110.2, 66.6, 66.3, 62.5, 61.6, 44.2, 44.1; **HRMS (ESI-TOF)**  $m/z$ :  $[M + H]^+$   $C_{25}H_{20}BrN_2O_2$  calcd. 459.0708, found, 459.0698.

**4-((1'-Benzyl-2,2'-dioxospiro[cyclopentane-1,3'-indolin]-3-en-5-yl)amino)benzonitrile(7).**

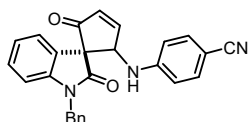

Following the general procedure, reaction of compound **1a** (0.05 g, 0.16 mmol, 1.0 equiv) and 4-aminobenzonitrile **2e** (0.039 g, 0.33 mmol, 2.0 equiv) in presence of PMA (0.06 g, 0.033 mmol) delivered spirooxindole **7**, which was purified by silica gel column chromatography (Hexane/EtOAc6:4) to furnish the title compound (red solid) in 65% (0.043 g) yield as inseparable mixture of diastereomers (2.1:1 *dr*).  $R_f$  0.4 (EtOAc: Hexane 4:6); mp. 203-205 °C; **FT-IR** ( $\nu$   $cm^{-1}$ ): 3355, 2926, 2215, 1726, 1695, 1604, 1528, 1491, 1468, 1345, 1174;  **$^1H$  NMR** (400 MHz, DMSO-*d*<sub>6</sub>)  $\delta$  8.26 (dd,  $J$  = 5.2, 1.6 Hz, 0.47H), 8.13 (d,  $J$  = 4.1 Hz, 1H), 7.52 (d,  $J$  = 8.8 Hz, 1H), 7.42 (d,  $J$  = 7.3 Hz, 1H), 7.36 (d,  $J$  = 3.8 Hz, 2H), 7.27 (d,  $J$  = 8.0 Hz, 3H), 7.14 (m,  $J$  = 13.1, 7.1 Hz, 3H), 7.07 (t,  $J$  = 7.7 Hz, 2H), 6.91 (d,  $J$  = 7.4 Hz, 2H), 6.85 (t,  $J$  = 7.7 Hz, 1H), 6.78 (d,  $J$  = 7.8 Hz, 1H), 6.71-6.67(m,1H), 6.37 (d,  $J$  = 7.7 Hz, 2H), 6.28 (d,  $J$  = 8.3 Hz, 1H), 5.49 (d,  $J$  = 8.7 Hz, 1H), 5.21 (d,  $J$  = 8.7 Hz, 0.46H), 4.94-4.90 (m, 2H), 4.63 (d,  $J$  = 16.0 Hz, 1H);  **$^{13}C\{^1H\}$  NMR** (100 MHz, DMSO-*d*<sub>6</sub>)  $\delta$  201.1, 200.9, 173.8, 170.4, 165.9, 165.5, 150.5, 150.2, 143.8, 143.3, 135.9, 135.5, 133.4, 133.3, 133.2, 128.9, 128.6 (2), 128.4, 128.3, 127.5, 127.1, 126.7, 125.0, 124.6, 123.0 (2), 122.2, 120.1, 120.0, 113.4, 112.4, 109.4, 97.2, 97.1, 66.7, 65.6, 61.6, 60.0, 43.0, 42.7; **HRMS(ESI-TOF)**  $m/z$ :  $[M + Na]^+$   $C_{26}H_{19}N_3NaO_2$  calcd. 428.1375, found, 428.1370.

**1'-Benzyl-2-((4-nitrophenyl)amino)spiro[cyclopentane-1,3'-indolin]-3-ene-2',5-dione(8).**

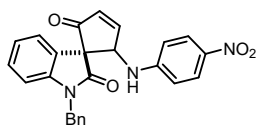

Following the general procedure, reaction of compound **1a** (0.05 g, 0.16 mmol, 1.0 equiv) and 4-nitroaniline **2f** (0.045 g, 0.32 mmol, 2.0 equiv) in presence of PMA (0.06 g, 0.032 mmol) delivered spirooxindole **8**, which was purified by silica gel column chromatography (Hexane: EtOAc 5:5) to furnish the title compound (yellow solid) in 69% (0.048 g) yield as inseparable mixture of diastereomers (2.5:1 *dr*).  $R_f$  0.35 (EtOAc: Hexane 6:4); mp. 175-177 °C; **FT-IR** ( $\nu$   $\text{cm}^{-1}$ ): 3341, 2928, 1726, 1695, 1599, 1505, 1485, 1467, 1321, 1112;  **$^1\text{H}$  NMR** (400 MHz, DMSO-*d*<sub>6</sub>)  $\delta$  8.28 - 7.94 (m, 4H), 7.75 - 7.65 (m, 3H), 7.44 - 7.28 (m, 4H), 7.13 - 7.09 (m, 3H), 6.99-6.92(m, 5H), 6.82 (d,  $J$  = 5.9 Hz, 1H), 6.72 (s, 1H), 6.35-6.29(m, 3H), 5.55 (d,  $J$  = 5.5 Hz, 1H), 5.27 (d,  $J$  = 6.3 Hz, 0.41H), 4.92 (d,  $J$  = 15.3 Hz, 2H), 4.62 (d,  $J$  = 15.6 Hz, 1H);  **$^{13}\text{C}\{^1\text{H}\}$  NMR** (100 MHz, DMSO-*d*<sub>6</sub>)  $\delta$  201.0, 200.8, 173.6, 170.3, 165.5, 165.1, 152.9, 143.4, 136.7, 136.0, 135.5, 133.7, 129.1, 128.6, 128.3, 128.2, 127.6, 127.1, 126.7, 125.8, 123.1, 112.4, 109.5, 66.7, 65.5, 61.8, 60.1, 43.1, 42.8; **HRMS(ESI-TOF)**  $m/z$ :  $[\text{M} + \text{Na}]^+$  C<sub>25</sub>H<sub>19</sub>N<sub>3</sub>NaO<sub>4</sub> calcd. 448.1273, found, 448.1279.

**2-((4-Acetylphenyl)amino)-1'-benzylspiro[cyclopentane-1,3'-indolin]-3-ene-2',5-dione(9).**

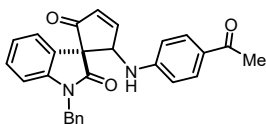

Following the general procedure, reaction of compound **1a** (0.050 g, 0.16 mmol, 1.0 equiv) and 1-(4-aminophenyl)ethan-1-one **2g** (0.045 g, 0.33 mmol, 2.0 equiv) in presence of PMA (0.06 g, 0.033 mmol) delivered spirooxindole **9**, which was purified by silica gel column chromatography (Hexane: EtOAc 5:5) to furnish the title compound as (red solid) in 78% (0.054 g) yield as inseparable mixture of diastereomers (1.4:1 *dr*).  $R_f$  0.3 (EtOAc: Hexane 5:5); mp. 174-176 °C; **FT-IR** ( $\nu$   $\text{cm}^{-1}$ ): 3354, 2924, 2852, 1728, 1699, 1597, 1523, 1488, 1468, 1358, 1274, 1181;  **$^1\text{H}$  NMR** (400 MHz, CDCl<sub>3</sub>)  $\delta$  7.91 (ddd,  $J$  = 10.7, 5.6, 1.9 Hz, 2H), 7.65 (d,  $J$  = 8.6 Hz, 2H), 7.55 (d,  $J$  = 8.6 Hz, 1.5H), 7.28 - 7.22 (m, 4.41H), 7.19 (d,  $J$  = 8.0 Hz, 1.8H), 7.14-7.04 (m, 4.9H), 6.98 (d,  $J$  = 7.3 Hz, 0.8H), 6.92-6.88 (m, 2.70H), 6.63 (dd,  $J$  = 7.7, 3.4 Hz, 1.82H), 6.58 - 6.54 (m, 1.74H), 6.41 (d,  $J$  = 8.6 Hz, 2H), 6.35 (d,  $J$  = 8.6 Hz, 1.44H), 5.46 - 5.29 (m, 2.94H), 4.95-4.90 (m, 2.39H), 4.65-4.60 (m, 1.65H), 2.45 (s, 3H), 2.41 (s, 2.23 H);  **$^{13}\text{C}\{^1\text{H}\}$  NMR** (100 MHz, CDCl<sub>3</sub>)  $\delta$  200.0, 199.9, 196.5(2), 174.1, 171.3, 162.9(2), 150.0, 149.7, 144.3, 143.7, 135.1, 135.0, 134.9, 134.6, 130.9, 130.8, 130.7, 129.5, 129.4, 129.0, 128.8, 128.5, 128.3, 128.1, 127.8, 127.6, 127.3, 126.7,

124.9,123.7, 123.6,122.8, 122.2, 113.8, 112.8, 112.4, 110.3, 66.5, 66.4, 61.8, 60.6, 44.2, 44.1, 26.2(2).; **HRMS(ESI-TOF)** m/z:  $[M + Na]^+$  C<sub>27</sub>H<sub>22</sub>N<sub>2</sub>NaO<sub>3</sub> calcd. 445.1528, found, 445.1546.

**Methyl 4-((1'-benzyl-2,2'-dioxospiro[cyclopentane-1,3'-indolin]-3-en-5-yl)amino)benzoate(10).**

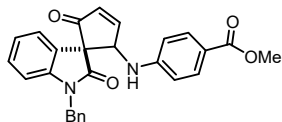

Following the general procedure, reaction of compound **1a** (0.050 g, 0.16 mmol, 1.0 equiv) and methyl 4-aminobenzoate **2h** (0.05 g, 0.33 mmol, 2.0 equiv) in presence of PMA (0.06 g, 0.033 mmol) delivered spirooxindole **10**, which was purified by silica gel column chromatography (Hexane: EtOAc 6:4) to furnish the title compound as (red solid) in 80% (0.058 g) yield as inseparable mixture of diastereomers (1:1 *dr*). *R<sub>f</sub>* 0.35 (EtOAc: Hexane 6:4); mp. 169-171 °C; **FT-IR** ( $\nu$  cm<sup>-1</sup>): 3364, 2919, 1701, 1604, 1528, 1488, 1468, 1432, 1347, 1281, 1177, 1109; **<sup>1</sup>H NMR** (400 MHz, CDCl<sub>3</sub>)  $\delta$  7.86 (m, 1.92H), 7.67 (d, *J* = 8.6 Hz, 2H), 7.60 (d, *J* = 8.5 Hz, 2H), 7.26 - 7.24 (m, 3H), 7.21-7.14(m, 4H), 7.12-7.04 (m, 5H), 6.95 (d, *J* = 7.3 Hz, 1H), 6.88-6.85 (m, 3H), 6.58 (d, *J* = 7.5 Hz, 2H), 6.53 - 6.48 (m, 2H), 6.37 (d, *J* = 8.6 Hz, 2H), 6.31 (d, *J* = 8.6 Hz, 1.42H), 5.40 (d, *J* = 9.7 Hz, 0.84H), 5.32 (q, *J* = 10.8 Hz, 2H), 4.90-4.87 (m, 2H), 4.62 - 4.56 (m, 2H), 3.81 (s, 3H), 3.79 (s, 2H); **<sup>13</sup>C{<sup>1</sup>H} NMR** (100 MHz, CDCl<sub>3</sub>)  $\delta$  200.0, 199.9, 174.1, 171.4, 167.0(2), 163.0, 149.7, 149.4, 144.4, 143.7, 135.0(2), 134.9, 134.6, 131.7, 131.5, 129.5, 129.4, 129.0, 128.8, 127.8, 127.6, 127.2, 126.6, 124.9, 123.7, 123.5, 122.8, 122.2, 120.3, 120.2, 112.9, 112.5, 110.3, 110.2, 66.5, 64.4, 61.9, 60.7, 51.8, 51.7, 44.3, 44.1; **HRMS(ESI-TOF)** m/z:  $[M + Na]^+$  C<sub>27</sub>H<sub>22</sub>N<sub>2</sub>NaO<sub>4</sub> calcd. 461.1477, found, 461.1491.

**1'-Benzyl-2-((3-bromophenyl)amino)spiro[cyclopentane-1,3'-indolin]-3-ene-2',5-dione(11).**

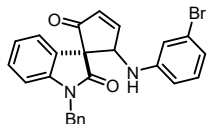

Following the general procedure, reaction of compound **1a** (0.050 g, 0.16 mmol, 1.0 equiv) and 3-bromoaniline **2i** (0.057 g, 0.33 mmol, 2.0 equiv) in presence of PMA (0.06 g, 0.033 mmol) delivered spirooxindole **11**, which was purified by silica gel column chromatography (Hexane/EtOAc 7:3) to furnish the title compound as (brown solid) in 49% (0.037 g) yield as inseparable mixture of diastereomers (1.8:1 *dr*).  $R_f$  0.3 (EtOAc: Hexane 3:7); mp. 105-107 °C. **<sup>1</sup>H NMR** (400 MHz, CDCl<sub>3</sub>) δ 7.90 - 7.86 (m, 1.47H), 7.29-7.26 (m, 2.37 H), 7.23 -7.16 (m, 6.29H), 7.11 (t,  $J = 7.5$  Hz, 2H), 6.97 (t,  $J = 7.4$  Hz, 1H), 6.92 (d,  $J = 7.2$  Hz, 2.37H), 6.85 - 6.82 (m, 1.87H), 6.81 - 6.77 (m, 1.41H), 6.63 - 6.58 (m, 1.77 H), 6.56- 6.50 (m, 3.2H), 6.35 (d,  $J = 7.5$  Hz, 1H), 6.30 (dd,  $J = 7.1, 1.9$  Hz, 0.52 H), 5.36 (d,  $J = 10.1$  Hz, 0.55H), 5.22 (d,  $J = 11.1$  Hz, 1H), 5.04-4.98 (m, 1.60 H), 4.91 (d,  $J = 16.0$  Hz, 1H), 4.80 (d,  $J = 15.9$  Hz, 0.62H), 4.66 (d,  $J = 16.0$  Hz, 1H); **<sup>13</sup>C{<sup>1</sup>H} NMR** (100 MHz, CDCl<sub>3</sub>) δ 200.2, 199.9, 174.3, 171.4, 163.3(2), 147.1, 146.8, 144.5, 143.8, 135.1, 134.8(2), 130.7, 130.6, 129.4(2), 129.0, 128.9, 128.7, 127.7, 127.6, 127.0, 126.7, 125.0, 123.7, 123.3, 123.2, 123.1, 122.8(2), 122.2, 122.0, 117.0 (2), 112.9, 112.4, 110.3(2), 66.6, 66.5, 62.5, 61.5, 44.3, 44.1; **HRMS (ESI-TOF)**  $m/z$ : [M + H]<sup>+</sup> C<sub>25</sub>H<sub>20</sub>BrN<sub>2</sub>O<sub>2</sub> calcd. 459.0708, found, 459.0700.

### 1'-Benzyl-2-((3-nitrophenyl)amino)spiro[cyclopentane-1,3'-indolin]-3-ene-2',5-dione (**12**).

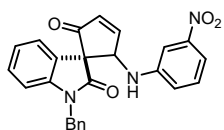

Following the general procedure, reaction of 1-benzyl-3-(furan-2-yl)-3-hydroxyindolin-2-one **1a** (0.050 g, 0.1637 mmol, 1.0 equiv) and 3-nitroaniline **2j** (0.045 g, 0.3275 mmol, 2.0 equiv) in presence of PMA (0.060 g, 0.033 mmol) delivered spirooxindole **12**, which was purified by silica gel column chromatography (Hexane:EtOAc 5:5) to furnish the title compound as (red solid) in 79% (0.055 g) yield as inseparable mixture of diastereomers (1.6:1 *dr*).  $R_f$  0.3 (EtOAc: Hexane 5:5); mp. 121-123 °C. **<sup>1</sup>H NMR** (400 MHz, DMSO-*d*<sub>6</sub>) δ 8.31 - 8.27 (m, 0.63H), 8.14 (d,  $J = 4.3$  Hz, 1H), 7.46 (d,  $J = 7.2$  Hz, 1H), 7.31 - 7.23 (m, 6.67H), 7.19 - 7.09 (m, 4.2H), 7.05-7.00 (m, 3.63H), 6.88 (d,  $J = 7.6$  Hz, 2.65H), 6.80 - 6.75 (m, 2.40H), 6.72 - 6.63 (m, 1.67H), 5.48 (d,  $J =$

8.8 Hz, 1H), 5.26 (d,  $J = 8.8$  Hz, 0.43H), 5.01 (d,  $J = 15.9$  Hz, 0.50H), 4.85 (t,  $J = 16.0$  Hz, 1.50H), 4.62 (d,  $J = 16.0$  Hz, 0.95H);  $^{13}\text{C}\{^1\text{H}\}$  NMR (100 MHz, DMSO- $d_6$ )  $\delta$  201.2, 201.0, 173.9, 170.4, 166.1, 165.6, 148.6, 148.4, 148.0, 147.8, 143.8, 143.3, 135.9, 135.5, 133.4, 133.2, 129.9, 129.8, 128.9, 128.6, 128.5, 128.3, 127.5, 127.1(2), 126.5, 125.1, 124.6, 123.0(2), 122.2, 119.2, 118.4, 111.0 (2), 109.4, 109.3, 105.8, 105.6, 66.7, 65.7, 62.4, 60.6, 42.9, 42.8; HRMS(ESI-TOF)  $m/z$ :  $[\text{M} + \text{Na}]^+$   $\text{C}_{25}\text{H}_{19}\text{N}_3\text{NaO}_4$  calcd. 448.1273, found, 448.1285.

### 2-((3-Acetylphenyl)amino)-1'-benzylspiro[cyclopentane-1,3'-indolin]-3-ene-2',5-dione(13).

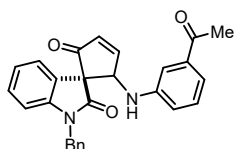

Following the general procedure, reaction of 1-benzyl-3-(furan-2-yl)-3-hydroxyindolin-2-one **1a** (0.050 g, 0.164 mmol, 1.0 equiv) and 1-(3-aminophenyl)ethan-1-one **2k** (0.045 g, 0.33 mmol, 2.0 equiv) in presence of PMA (0.06 g, 0.033 mmol) delivered spirooxindole **13**, which was purified by silica gel column chromatography (Hexane: EtOAc 5:5) to furnish the title compound as (red solid) in 75% (0.052 g) yield as inseparable mixture of diastereomers (2:1 *dr*).  $R_f$  0.3 (EtOAc: Hexane 5:5); mp. 121-123 °C; FT-IR ( $\nu$   $\text{cm}^{-1}$ ): 3363, 2927, 1722, 1693, 1601, 1488, 1468, 1436, 1361, 1268, 1240, 1159;  $^1\text{H}$  NMR (400 MHz,  $\text{CDCl}_3$ )  $\delta$  7.95 - 7.94 (m, 0.47H), 7.92 (dd,  $J = 5.7$ , 2.2 Hz, 1H), 7.30 (d,  $J = 7.6$  Hz, 1.2H), 7.23 (d, 2.12H), 7.21(s, 1.31H), 7.19-7.16 (m, 2H), 7.13 (d,  $J = 7.7$  Hz, 2H), 7.09 (d,  $J = 7.6$  Hz, 2.31H), 7.07 - 7.05 (m, 0.87H), 7.03 - 7.00 (m, 1H), 6.93 (d,  $J = 10.7$  Hz, 2H), 6.85 (d,  $J = 7.3$  Hz, 2H), 6.71 (dd,  $J = 8.0$ , 2.1 Hz, 1H), 6.62- 6.52 (m, 3.80H), 5.46 (d,  $J = 7.6$  Hz, 0.60H), 5.35 (d,  $J = 11.2$  Hz, 1H), 5.10 (d,  $J = 11.3$  Hz, 1H), 4.99 (d,  $J = 15.9$  Hz, 0.68H), 4.89 (d,  $J = 16.0$  Hz, 1H), 4.76 (d,  $J = 16.0$  Hz, 0.65H), 4.63 (d,  $J = 16.0$  Hz, 1H), 2.43 (s, 1.77H), 2.21 (s, 3H);  $^{13}\text{C}\{^1\text{H}\}$  NMR (100 MHz,  $\text{CDCl}_3$ )  $\delta$  200.2, 199.9, 198.1, 198.0, 174.25, 171.4, 163.5, 163.4, 146.0, 145.8, 144.5, 143.8, 138.3, 138.1, 135.1, 134.8(2), 129.7, 129.6, 129.3(2) 129.0, 128.9, 128.9, 127.7, 127.6, 127.0, 126.7, 125.0, 123.7, 123.3, 122.8, 122.3, 119.6, 119.3, 119.2, 118.2, 113.7, 112.7, 110.3, 110.2, 66.6, 66.4, 62.5, 61.6, 44.2, 26.7, 26.5; HRMS (ESI-TOF)  $m/z$ :  $[\text{M} + \text{Na}]^+$   $\text{C}_{27}\text{H}_{22}\text{N}_2\text{NaO}_3$  calcd. 445.1528, found, 445.1542.



**1'-Benzyl-2-((3,5-dichlorophenyl)amino)spiro[cyclopentane-1,3'-indolin]-3-ene-2',5-dione(14).**

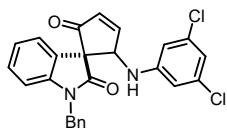

Following the general procedure, reaction of 1-benzyl-3-(furan-2-yl)-3-hydroxyindolin-2-one **1a** (0.050 g, 0.164 mmol, 1.0 equiv) and 3,5-dichloroaniline **2l** (0.053 g, 0.33 mmol, 2.0 equiv) in presence of PMA (0.06 g, 0.033 mmol) delivered compound **14**, which was purified by silica gel column chromatography (Hexane: EtOAc 8:2) to furnish the title compound as (brown solid) in 76% (0.056 g) yield as inseparable mixture of diastereomers (>20:1 *dr*).  $R_f$  0.4 (EtOAc: Hexane 2:8); mp. 229-230 °C; **FT-IR** ( $\nu$   $\text{cm}^{-1}$ ): 3359, 2927, 2855, 1725, 1693, 1592, 1488, 1466, 1453, 1361, 1162;  **$^1\text{H}$  NMR** (400 MHz, DMSO-*d*6)  $\delta$  8.10 (d,  $J$  = 4.6 Hz, 1H), 7.44 (d,  $J$  = 7.3 Hz, 1H), 7.27 (t,  $J$  = 7.6 Hz, 1H), 7.19-7.14 (m, 2H), 7.11 (d,  $J$  = 8.0 Hz, 2H), 6.92 (d,  $J$  = 7.3 Hz, 2H), 6.78 (d,  $J$  = 7.7 Hz, 1H), 6.66 (d,  $J$  = 4.5 Hz, 1H), 6.57 (s, 1H), 6.24 (s, 2H), 5.41 (s, 1H), 4.92 (d,  $J$  = 16.1 Hz, 1H), 4.66 (d,  $J$  = 16.1 Hz, 1H);  **$^{13}\text{C}\{^1\text{H}\}$  NMR** (100 MHz, DMSO-*d*6)  $\delta$  200.9, 170.4, 165.5, 149.1, 149.0, 143.4, 135.6, 134.3, 133.4, 128.9, 128.5, 128.4, 127.1, 126.5, 123.1, 123.0, 122.9, 115.5, 110.8, 109.5, 67.0, 62.1, 42.8; **HRMS (ESI-TOF)**  $m/z$ :  $[\text{M} + \text{Na}]^+$   $\text{C}_{25}\text{H}_{18}\text{Cl}_2\text{N}_2\text{NaO}_2$  calcd. 471.0643, found, 471.0652.

**1'-Benzyl-2-((2-fluorophenyl)amino)spiro[cyclopentane-1,3'-indolin]-3-ene-2',5-dione(15).**

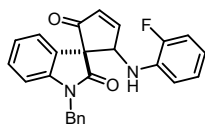

Following the general procedure, reaction of 1-benzyl-3-(furan-2-yl)-3-hydroxyindolin-2-one **1a** (0.050 g, 0.16 mmol, 1.0 equiv) and 2-fluoroaniline **2m** (0.037 g, 0.33 mmol, 2.0 equiv) in presence of PMA (0.06 g, 0.033 mmol) delivered compound **15**, which was purified by silica gel column chromatography (Hexane: EtOAc 9:1) to furnish the title compound (yellow solid) in 74% (0.048 g) yield as inseparable mixture of diastereomers (1.1:1 *dr*).  $R_f$  0.35 (EtOAc: Hexane 1:9); mp. 137-139 °C.  **$^1\text{H}$  NMR** (400 MHz,  $\text{CDCl}_3$ )  $\delta$  8.04 (dd,  $J$  = 5.6, 2.3 Hz, 0.89H), 8.00 (dd,  $J$  = 5.7, 2.2 Hz, 1H), 7.38-7.33(m, 3H), 7.29 (dd,  $J$  = 7.5, 1.5 Hz, 2H), 7.24 - 7.22 (m, 3.48H), 7.19-7.13 (m, 2H), 7.09 (d,  $J$  = 6.8 Hz, 0.90H), 7.06 - 6.98 (m, 4H), 6.85 - 6.71 (m, 3.82H), 6.68-6.60 (m,

5.62H), 6.40- 6.36 (m, 1H), 5.52 (d,  $J = 10.7$  Hz, 0.89H), 5.37 (d,  $J = 11.3$  Hz, 1H), 5.18 (dd,  $J = 11.3, 2.2$  Hz, 1H), 4.99 (dd,  $J = 15.9, 7.4$  Hz, 2H), 4.91 (d,  $J = 15.9$  Hz, 0.92H), 4.74 (d,  $J = 16.0$  Hz, 1H), 4.41 (dd,  $J = 10.7, 3.1$  Hz, 0.84H);  $^{13}\text{C}\{^1\text{H}\}$  NMR (100 MHz,  $\text{CDCl}_3$ )  $\delta$  200.1, 200.0, 174.4, 171.2, 163.5, 163.4, 144.3, 143.9, 135.2, 134.9, 134.8, 134.3, 134.2, 134.0, 133.9, 129.3, 129.2, 129.0, 128.9, 128.7, 127.7, 127.5, 127.2, 126.8, 125.0, 124.6 (2), 124.5(2), 123.5, 123.2, 122.8, 122.2, 118.8(2), 118.7, 118.6, 115.3, 115.2, 114.8, 114.6, 113.3(2), 110.1, 110.0, 66.7, 66.5, 62.2, 61.1, 44.2, 44.1; **HRMS(ESI-TOF)**  $m/z$ :  $[\text{M} + \text{Na}]^+$   $\text{C}_{25}\text{H}_{19}\text{FN}_2\text{NaO}_2$  calcd. 421.1328, found, 421.1323.

### 2-((1'-Benzyl-2,2'-dioxospiro[cyclopentane-1,3'-indolin]-3-en-5-yl)amino)benzotrile(16).

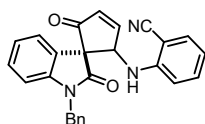

Following the general procedure, reaction of 1-benzyl-3-(furan-2-yl)-3-hydroxyindolin-2-one **1a** (0.050 g, 0.164 mmol, 1.0 equiv) and 2-aminobenzotrile **2n** (0.039 g, 0.33 mmol, 2.0 equiv) in presence of PMA (0.06 g, 0.033 mmol) delivered compound **16**, which was purified by silica gel column chromatography (Hexane: EtOAc 6:4) to furnish the title compound as (red solid) in 81% (0.054 g) yield as inseparable mixture of diastereomers (1:1 *dr*).  $R_f$  0.4 (EtOAc: Hexane 4:6); mp. 152-154 °C; **FT-IR** ( $\nu$   $\text{cm}^{-1}$ ): 3364, 3027, 2215, 1726, 1698, 1604, 1582, 1519, 1485, 1466, 1451, 1366, 1162;  $^1\text{H}$  NMR (400 MHz,  $\text{CDCl}_3$ )  $\delta$  7.93 (dd,  $J = 16.1, 4.1$  Hz, 2H), 7.40 (d,  $J = 7.5$  Hz, 1H), 7.28 - 7.26 (m, 6.31H), 7.21 - 7.07 (m, 10H), 7.01-6.96 (m, 3.88H), 6.72-6.59 (m, 6.21H), 6.46 (d,  $J = 8.4$  Hz, 1H), 6.24 (d,  $J = 8.4$  Hz, 1H), 5.66 (d,  $J = 10.2$  Hz, 0.94H), 5.46 (d,  $J = 9.6$  Hz, 1H), 5.31 (d,  $J = 10.3$  Hz, 1H), 4.97-4.90 (m, 4H), 4.65 (d,  $J = 15.8$  Hz, 1H);  $^{13}\text{C}\{^1\text{H}\}$  NMR (100 MHz,  $\text{CDCl}_3$ )  $\delta$  199.5, 174.1, 170.9, 162.3, 148.1, 148.0, 147.8, 144.1, 144.0, 143.9, 135.3, 135.2, 135.1, 134.9, 134.5, 134.3, 134.1, 133.4, 132.8, 129.5, 129.4, 128.9, 128.8, 128.3, 127.8, 127.5, 127.4, 127.0, 124.6, 123.7, 123.5, 123.3, 122.3, 118.5, 118.3, 117.0, 111.9, 111.5, 110.1, 110.0, 98.3, 97.1, 66.3, 66.0, 61.7, 60.4, 44.2(2); **HRMS(ESI-TOF)**  $m/z$ :  $[\text{M} + \text{Na}]^+$   $\text{C}_{26}\text{H}_{19}\text{N}_3\text{NaO}_2$  calcd. 428.1375, found, 428.1372.

**1'-Benzyl-2-((2,3-dichlorophenyl)amino)spiro[cyclopentane-1,3'-indolin]-3-ene-2',5-dione(17).**

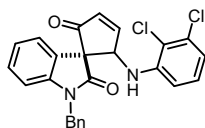

Following the general procedure, reaction of 1-benzyl-3-(furan-2-yl)-3-hydroxyindolin-2-one **1a** (0.050 g, 0.164 mmol, 1.0 equiv) and 2,3-dichloroaniline **2o** (0.053 g, 0.33 mmol, 2.0 equiv) in presence of PMA (0.060 g, 0.033 mmol) delivered compound **17**, which was purified by silica gel column chromatography (Hexane: EtOAc 8:2) to furnish the title compound (brown solid) in 76% (0.056 g) yield as inseparable mixture of diastereomers (1.5:1 *dr*).  $R_f$  0.4 (EtOAc: Hexane 2:8); mp. 154-156 °C  $^1\text{H NMR}$  (400 MHz,  $\text{CDCl}_3$ )  $\delta$  7.92 (dd,  $J = 5.6, 2.2$  Hz, 0.66H), 7.87 (dd,  $J = 5.7, 2.1$  Hz, 1H), 7.24 -7.19 (m, 4H), 7.17 - 7.11 (m, 4.70H), 7.06 (t,  $J = 7.6$  Hz, 1.73H), 6.98 (d,  $J = 7.2$  Hz, 0.69H), 6.92-6.87 (m, 2.84H), 6.74 (dd,  $J = 8.0, 1.1$  Hz, 1H), 6.70-6.66(m, 2.36H), 6.63-6.57 (m, 1.80H), 6.55 -6.52 (m, 1.72H), 6.35 -6.33(m, 0.68H), 6.12 (d,  $J = 8.0$  Hz, 1H), 5.61 (d,  $J = 10.7$  Hz, 1H), 5.38 (d,  $J = 9.9$  Hz, 0.70H), 5.24 (d,  $J = 10.7$  Hz, 1H), 4.96 (d,  $J = 15.8$  Hz, 1H), 4.87-4.81 (m, 2H), 4.56 (d,  $J = 15.8$  Hz, 1H);  $^{13}\text{C}\{^1\text{H}\}$  NMR (100 MHz,  $\text{CDCl}_3$ )  $\delta$  199.8, 199.7, 174.2, 171.0, 162.8, 162.7, 144.1, 143.9, 143.4, 143.1, 135.1(2), 135.0, 134.8, 133.6, 133.1, 129.4(2), 129.0, 128.8, 128.5, 127.8, 127.7, 127.6(2), 127.3, 126.9, 124.7, 123.5(2), 123.0, 122.3, 119.7, 119.6, 118.7, 117.7, 110.1(2), 110.0, 109.8, 66.7, 66.2, 62.0, 61.0, 44.2(2); HRMS (ESI-TOF)  $m/z$ :  $[\text{M} + \text{Na}]^+$   $\text{C}_{25}\text{H}_{18}\text{Cl}_2\text{N}_2\text{NaO}_2$  calcd. 471.0643, found, 471.0649.

**1'-Benzyl-2-((2-chloro-4-nitrophenyl)amino)spiro[cyclopentane-1,3'-indolin]-3-ene-2',5-dione(18).**

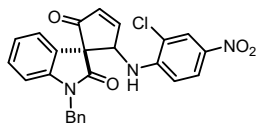

Following the general procedure, reaction of 1-benzyl-3-(furan-2-yl)-3-hydroxyindolin-2-one **1a** (0.050 g, 0.164 mmol, 1.0 equiv) and 2-chloro-4-nitroaniline **2p** (0.056 g, 0.33 mmol, 2.0 equiv) in presence of PMA (0.060 g, 0.033 mmol) delivered spirooxindole **18**, which was purified by silica gel column chromatography (Hexane:EtOAc 6:4) to furnish the title compound (red solid) in 73% (0.055g) yield as inseparable mixture of diastereomers (>20:1 *dr*).  $R_f$  0.4 (EtOAc: Hexane

5:5); mp. 182-184 °C. **<sup>1</sup>H NMR** (400 MHz, DMSO-*d*<sub>6</sub>) δ 8.28 (dd, *J* = 5.2, 1.9 Hz, 0.26H), 8.24 (dd, *J* = 5.4, 1.5 Hz, 1H), 8.17 (d, *J* = 2.3 Hz, 1H), 7.94 (d, *J* = 2.3 Hz, 0.21H), 7.66 (dd, *J* = 9.2, 2.2 Hz, 1H), 7.50-7.48(m, 0.30 H), 7.44 (d, *J* = 7.4 Hz, 1H), 7.40-7.35 (m, 1H), 7.30 (t, *J* = 7.7 Hz, 1.74H), 7.15-7.03(m, 4.33H), 6.93 (d, *J* = 7.8 Hz, 2H), 6.85 (d, *J* = 9.2 Hz, 1H), 6.72 (dd, *J* = 5.4Hz, 1.24H), 6.45 (d, *J* = 9.3 Hz, 1H), 6.71(m, 1H), 6.4 (d, *J* = 9.1 Hz, 0.22H), 5.81 (d, *J* = 8.8 Hz, 1H), 4.93 (d, *J* = 15.6 Hz, 1.33H), 4.70 (d, *J* = 15.8 Hz, 1H); **<sup>13</sup>C{<sup>1</sup>H} NMR** (100 MHz, DMSO-*d*<sub>6</sub>) δ 200.7, 200.0, 173.8, 170.6, 165.9, 165.3, 148.0, 147.7, 143.8, 143.2, 137.2, 136.7, 135.9, 135.5, 133.4, 132.8, 129.2, 128.6, 128.3, 128.0, 127.7,127.6, 127.3, 126.9, 125.4, 125.0, 124.7, 124.6, 124.2, 123.2, 123.2, 122.2, 117.7, 117.1, 110.4, 109.9, 109.7, 109.4, 66.1, 65.1, 60.6, 60.3, 43.1, 42.9; **HRMS (ESI-TOF)** *m/z*: [M + Na]<sup>+</sup> C<sub>25</sub>H<sub>18</sub>ClN<sub>3</sub>NaO<sub>4</sub> calcd. 482.0884, found, 482.0896.

**1'-Benzyl-2-((4-methoxy-2-nitrophenyl)amino)spiro[cyclopentane-1,3'-indolin]-3-ene-2',5-dione (19).**

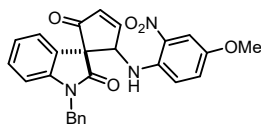

Following the general procedure, reaction of 1-benzyl-3-(furan-2-yl)-3-hydroxyindolin-2-one **1a** (0.050 g, 0.16 mmol, 1.0 equiv) and 4-methoxy-2-nitroaniline **2q** (0.055 g, 0.33 mmol, 2.0 equiv) in presence of PMA (0.060 g, 0.033 mmol) delivered spirooxindole **19**, which was purified by silica gel column chromatography (Hexane: EtOAc 6:4) to furnish the title compound as (red solid) in 73% (0.054 g) yield as inseparable mixture of diastereomers (1.7:1 *dr*). *R<sub>f</sub>* 0.4 (EtOAc: Hexane 5:5); mp. 168-170 °C; **FT-IR** (*ν* cm<sup>-1</sup>): 3360, 3065, 3028, 2936, 1725, 1696, 1610, 1572, 1517, 1468, 1347, 1292, 1234, 1153, 1063, 1037; **<sup>1</sup>H NMR** (400 MHz, CDCl<sub>3</sub>) δ 8.50 (d, *J* = 7.2 Hz, 1.16H), 8.20 (d, *J* = 6.1 Hz, 0.63H), 8.08-8.01 (m, 1.92H), 7.68 (s, 1H), 7.50 (s, 0.72H), 7.39 (s, 2.49H), 7.33 (d, *J* = 7.7 Hz, 1.90H), 7.29 - 7.24 (m, 1.76H), 7.20-7.19 (m, 5.25H), 7.05 (m, 3H), 6.96 (d, 1H), 6.83- 6.70 (m, 5H), 6.60 (d, *J* = 8.9 Hz, 0.63H), 6.39 (d, *J* = 8.0 Hz, 1.15H), 5.58 (d, *J* = 7.3 Hz, 0.53H), 5.41 (d, *J* = 7.3 Hz, 1.1H), 5.03-5.01 (m, 2.23H), 4.69 (d, *J* = 15.4 Hz, 1H), 3.83 (s, 3H), 3.77 (s, 1.75H); **<sup>13</sup>C{<sup>1</sup>H} NMR** (100 MHz, CDCl<sub>3</sub>) δ 199.6, 199.5, 174.0, 170.5, 162.2, 162.0, 150.7, 144.0, 138.5, 138.2, 135.4, 135.3, 135.0, 133.1, 132.3, 129.6, 129.5, 129.0, 128.7, 128.2, 128.0, 127.6, 127.5, 127.2, 126.4, 125.9, 124.6, 123.8, 123.5, 123.1,122.4,

115.4,115.3, 110.1, 110.0, 108.4, 107.9, 66.8, 66.2, 62.1, 60.5, 55.9, 44.3, 44.2; **HRMS (ESI-TOF)** m/z:  $[M + Na]^+$   $C_{26}H_{21}N_3NaO_5$  calcd. 478.1379, found, 478.1391.

**1'-Benzyl-5'-methyl-2-((4-nitrophenyl)amino)spiro[cyclopentane-1,3'-indolin]-3-ene-2',5-dione (21).**

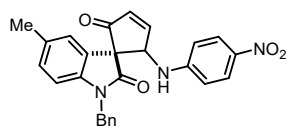

Following the general procedure, reaction of 1-benzyl-3-(furan-2-yl)-3-hydroxy-5-methylindolin-2-one **1c** (0.050 g, 0.157 mmol, 1.0 equiv) and 4-nitroaniline **2f** (0.058 g, 0.313 mmol, 2.0 equiv) in presence of PMA (0.058 g, 0.031 mmol) delivered compound **21**, which was purified by silica gel column chromatography (Hexane: EtOAc6:4) to furnish the title compound (red solid) in 79% (0.055 g) yield as inseparable mixture of diastereomers (>20:1 *dr*).  $R_f$  0.35 (EtOAc: Hexane 4:6); mp. 180-182 °C; **FT-IR** ( $\nu$   $cm^{-1}$ ): 3343, 2925, 1726, 1695, 1602, 1496, 1321, 1264, 1273, 1191, 1112;  **$^1H$  NMR** (400 MHz, DMSO-*d*<sub>6</sub>)  $\delta$  8.15 - 8.14 (m, 1H), 8.04 (d,  $J$  = 8.6 Hz, 0.94H), 7.76 (d,  $J$  = 8.7 Hz, 2H), 7.24 (s, 1H), 7.08 (d,  $J$  = 6.7 Hz, 2H), 6.99 (t,  $J$  = 7.4 Hz, 2H), 6.91 (d,  $J$  = 7.5 Hz, 1.87H), 6.70 (d,  $J$  = 7.6 Hz, 2H), 6.35-6.29 (m, 1.80H), 5.49 (d,  $J$  = 8.6 Hz, 1H), 4.88 (d,  $J$  = 15.9 Hz, 1H), 4.59 (d,  $J$  = 15.9 Hz, 1H), 2.31 (s, 3H);  **$^{13}C\{^1H\}$  NMR** (100 MHz, DMSO-*d*<sub>6</sub>)  $\delta$  200.9, 170.2, 165.0, 152.9, 140.9, 136.7, 135.6, 133.7, 132.2, 129.2, 128.4, 128.1, 127.0, 126.7, 125.8, 123.6, 109.2, 63.4, 61.8, 42.8, 20.7; **HRMS (ESI-TOF)** m/z:  $[M + Na]^+$   $C_{26}H_{21}N_3NaO_4$  calcd. 462.1430, found, 462.1444.

**1'-Benzyl-5'-methoxy-2-((4-nitrophenyl)amino)spiro[cyclopentane-1,3'-indolin]-3-ene-2',5-dione(22).**

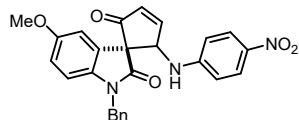

Following the general procedure, reaction of 1-benzyl-3-(furan-2-yl)-3-hydroxy-5-methoxyindolin-2-one **1d** (0.050 g, 0.15 mmol, 1.0 equiv) and 4-nitroaniline **2f** (0.055g, 0.298 mmol, 2.0 equiv) in presence of PMA (0.055 g, 0.03 mmol) delivered spirooxindole **22**, which was purified by silica gel column chromatography (Hexane: EtOAc 7:3) to furnish the title compound as (brown solid) in 80% (0.054 g) yield as inseparable mixture of diastereomers (5:1 *dr*).  $R_f$  0.4 (EtOAc: Hexane 4:6); mp. 170-172 °C; **FT-IR** ( $\nu$   $\text{cm}^{-1}$ ): 3334, 2927, 2854, 1715, 1694, 1607, 1494, 1454, 1436, 1338, 1200, 1182;  **$^1\text{H}$  NMR** (400 MHz, DMSO-*d*6)  $\delta$  8.31-8.28 (m, 0.30H), 8.14 (dd,  $J$  = 5.6, 2.0 Hz, 1H), 8.03 (d,  $J$  = 8.7 Hz, 1H), 7.77 (d,  $J$  = 8.9 Hz, 1.9H), 7.67 (d,  $J$  = 8.8 Hz, 0.45H), 7.38-7.30 (m, 1.20H), 7.14 (d,  $J$  = 2.4 Hz, 1H), 7.09 (t,  $J$  = 7.3 Hz, 1H), 6.99 (t,  $J$  = 7.5 Hz, 1.92H), 6.91-6.89 (m, 1.91H), 6.85 - 6.81 (m, 1.22H), 6.77 (d,  $J$  = 8.6 Hz, 0.26H), 6.72-6.68 (m, 2H), 6.64 (dd,  $J$  = 8.5, 2.4 Hz, 0.31H), 6.37 - 6.29 (m, 2H), 5.56 (d,  $J$  = 8.7 Hz, 1H), 5.27 (d,  $J$  = 8.8 Hz, 0.24 H), 4.96(d,  $J$  = 8.8 Hz, 0.27H), 4.90-4.84 (m, 1.2H), 4.58 (d,  $J$  = 15.9 Hz, 1H), 3.75 (s, 3H), 3.60 (s, 0.68H);  **$^{13}\text{C}\{^1\text{H}\}$  NMR** (100 MHz, DMSO-*d*6)  $\delta$  200.9, 200.7, 173.2, 169.9, 165.5, 165.0, 155.8, 155.1, 152.9, 152.6, 137.1, 136.7(2), 136.6, 136.0, 135.6, 133.6, 133.5, 129.4, 128.6, 128.1, 127.6, 127.0, 126.7, 125.8, 113.6, 113.5, 111.7, 110.3, 110.0, 109.9, 67.0, 65.7, 61.7, 59.9, 55.6(2), 43.1, 42.8; **HRMS(ESI-TOF)**  $m/z$ :  $[\text{M} + \text{Na}]^+$   $\text{C}_{26}\text{H}_{21}\text{N}_3\text{NaO}_5$  calcd. 478.1379, found, 478.1373.

**1'-Benzyl-5'-fluoro-2-((4-nitrophenyl)amino)spiro[cyclopentane-1,3'-indolin]-3-ene-2',5-dione (**23**).**

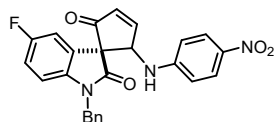

Following the general procedure, reaction of 1-benzyl-5-fluoro-3-(furan-2-yl)-3-hydroxyindolin-2-one **1e** (0.050 g, 0.155 mmol, 1.0 equiv) and 4-nitroaniline **2f** (0.057g, 0.31 mmol, 2.0 equiv) in presence of PMA (0.057 g, 0.03 mmol) delivered spirooxindole **23**, which was purified by silica gel column chromatography (Hexane/EtOAc 7:3) to furnish the title compound as (red solid) in 75% (0.056 g) yield as inseparable mixture of diastereomers (5:1 *dr*).  $R_f$  0.3 (EtOAc: Hexane 3:7);

mp. 170-172 °C; **FT-IR** ( $\nu$   $\text{cm}^{-1}$ ): 3350, 2930, 1726, 1694, 1596, 1502, 1488, 1454, 1314, 1276, 1171, 1114;  **$^1\text{H}$  NMR** (400 MHz,  $\text{DMSO-}d_6$ )  $\delta$  8.29 (d,  $J = 3.4$  Hz, 0.22H), 8.16 (d,  $J = 4.2$  Hz, 1H), 8.06 (d,  $J = 8.6$  Hz, 1H), 7.96-7.93 (m, 0.38H), 7.79 (d,  $J = 8.7$  Hz, 2H), 7.68 (d,  $J = 8.6$  Hz, 0.37H), 7.49-7.47 (m, 1H), 7.37 - 7.33 (m, 1H), 7.15 - 7.07 (m, 2.3H), 6.99 (t,  $J = 7.4$  Hz, 2.1H), 6.90-6.88 (m, 2.1H), 6.82-6.79 (m, 1H), 6.71 (d,  $J = 3.8$  Hz, 1.25H), 6.60 (d,  $J = 8.9$  Hz, 0.23H), 6.38 - 6.29 (m, 2.1H), 5.61 (d,  $J = 8.6$  Hz, 1H), 5.30 (d,  $J = 9.0$  Hz, 0.21H), 4.92 (d,  $J = 15.9$  Hz, 1.2H), 4.62 (d,  $J = 15.9$  Hz, 1H);  **$^{13}\text{C}\{^1\text{H}\}$  NMR** (100 MHz,  $\text{DMSO-}d_6$ )  $\delta$  200.4, 200.0, 173.3, 170.0, 165.6, 165.1, 159.8, 157.4, 152.8, 152.4, 139.6, 139.6, 136.8, 135.7, 135.3, 133.5, 129.8, 129.7, 128.6, 128.2, 127.7, 127.6, 127.1, 126.6, 126.4, 125.9, 125.8, 115.4, 115.1, 112.4, 111.7, 111.4, 110.4, 110.3, 67.1, 65.6, 61.4, 60.0, 43.2, 42.9; **HRMS(ESI-TOF)**  $m/z$ :  $[\text{M} + \text{Na}]^+$   $\text{C}_{25}\text{H}_{18}\text{FN}_3\text{NaO}_4$  calcd. 466.1179, found, 466.1195.

**1'-Benzyl-7'-fluoro-2-((4-nitrophenyl)amino)spiro[cyclopentane-1,3'-indolin]-3-ene-2',5-dione(24).**

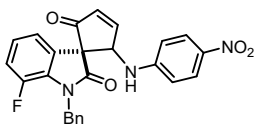

Following the general procedure, reaction of 1-benzyl-7-fluoro-3-(furan-2-yl)-3-hydroxyindolin-2-one **1f** (0.055 g, 0.17 mmol, 1.0 equiv) and 4-nitroaniline **2f** (0.063g, 0.340 mmol, 2.0 equiv) in presence of PMA (0.063 g, 0.034 mmol) delivered spirooxindole **24**, which was purified by silica gel column chromatography (Hexane:EtOAc 6:4) to furnish the title compound (red solid) in 76% (0.057 g) yield as inseparable mixture of diastereomers (5:1 *dr*).  $R_f$  0.3 (EtOAc: Hexane 5:5); mp. 162-164 °C; **FT-IR** ( $\nu$   $\text{cm}^{-1}$ ): 3350, 2929, 2854, 1728, 1696, 1601, 1505, 1485, 1315, 1191, 1153, 1113;  **$^1\text{H}$  NMR** (400 MHz,  $\text{DMSO-}d_6$ )  $\delta$  8.31 (dd,  $J = 5.5, 2.2$  Hz, 0.26H), 8.18 (dd,  $J = 5.6, 1.8$  Hz, 1.15H), 8.11 (d,  $J = 8.7$  Hz, 1H), 7.99 (d,  $J = 8.8$  Hz, 0.27H), 7.81 (d,  $J = 8.9$  Hz, 2.15H), 7.69 (d,  $J = 8.9$  Hz, 0.39H), 7.35-7.32 (m, 2.30H), 7.22-7.17 (m, 2.21H), 7.09 (t,  $J = 7.3$  Hz, 1H), 6.98 (t,  $J = 7.6$  Hz, 2.32H), 6.84 (d,  $J = 7.5$  Hz, 2H), 6.73 (dd,  $J = 5.6, 1.8$  Hz, 1.3H), 6.38 - 6.29 (m, 2H), 5.61 (d,  $J = 8.6$  Hz, 1H), 5.31(d,  $J = 8.6$  Hz, 0.20H), 5.04 - 4.95 (m, 1.36H), 4.73 (d,  $J = 16.2$  Hz, 1H);  **$^{13}\text{C}\{^1\text{H}\}$  NMR** (100 MHz,  $\text{DMSO-}d_6$ )  $\delta$  200.2, 199.8, 173.3, 169.9, 165.7, 165.3, 152.8, 152.4, 147.6, 145.1, 136.9, 136.9, 136.6, 136.3, 133.4, 131.0(2), 129.8, 129.7, 128.6, 128.1, 127.6, 127.0(2), 126.4, 126.0, 125.9, 125.8, 124.4, 124.3, 119.6(2), 117.3, 117.1, 112.4, 66.9, 65.6, 61.8,

60.3, 44.6(2); **HRMS (ESI-TOF)** m/z:  $[M + Na]^+$   $C_{25}H_{18}FN_3NaO_4$  calcd. 466.1179, found, 466.1192.

**1'-Benzyl-7'-chloro-2-((4-nitrophenyl)amino)spiro[cyclopentane-1,3'-indolin]-3-ene-2',5-dione (25).**

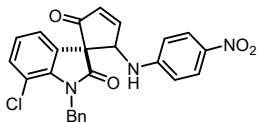

Following the general procedure, reaction of 1-benzyl-7-chloro-3-(furan-2-yl)-3-hydroxyindolin-2-one **1g** (0.050 g, 0.148 mmol, 1.0 equiv) and 4-nitroaniline **2f** (0.054 g, 0.29 mmol, 2.0 equiv) in presence of PMA (0.054 g, 0.03 mmol) delivered spirooxindole **25**, which was purified by silica gel column chromatography (Hexane: EtOAc 6:4) to furnish the title compound (red semi solid) in 75% (0.051g) yield as inseparable mixture of diastereomers (2:1 *dr*).  $R_f$  0.3 (EtOAc: Hexane 5:5);  $^1H$  NMR (400 MHz, DMSO-*d*<sub>6</sub>)  $\delta$  8.32 (dd,  $J = 5.5, 2.3$  Hz, 0.52H), 8.18 (dd,  $J = 5.6, 2.0$  Hz, 1H), 8.09 (d,  $J = 8.8$  Hz, 1H), 8.02 (d,  $J = 8.6$  Hz, 0.54H), 7.86 (d,  $J = 9.1$  Hz, 2H), 7.80 (d,  $J = 9.1$  Hz, 1H), 7.50 (d,  $J = 7.1$  Hz, 1H), 7.34-7.29 (m, 2.63H), 7.24 (d,  $J = 7.4$  Hz, 0.83H), 7.20 (d,  $J = 7.7$  Hz, 1.1H), 7.17-7.14 (m, 1.4H), 7.10 (t,  $J = 7.4$  Hz, 0.6H), 6.98 (t,  $J = 7.6$  Hz, 1.16H), 6.92 (t,  $J = 7.6$  Hz, 0.54H), 6.81 (d,  $J = 7.6$  Hz, 1.87H), 6.76 (dd,  $J = 5.6, 1.9$  Hz, 1.85H), 6.73 (dd,  $J = 5.6, 1.9$  Hz, 1H), 6.42-6.35 (m, 2.57H), 5.65 (d,  $J = 8.7$  Hz, 1H), 5.37 -5.32 (m, 1H), 5.24 (d,  $J = 16.6$  Hz, 0.65H), 5.15-5.05 (m, 2H);  $^{13}C\{^1H\}$  NMR (100 MHz, DMSO-*D*<sub>6</sub>-*d*<sub>6</sub>)  $\delta$  200.2, 199.7, 174.2, 170.7, 165.9, 165.5, 152.8, 152.4, 139.7, 139.1, 137.2, 137.0, 136.9(2), 133.3, 133.2, 131.3, 131.1, 131.0, 128.5, 128.1, 127.7, 127.2, 126.8, 126.2, 126.0, 125.9, 125.5, 124.6, 123.9, 123.8, 122.4, 114.2, 114.1, 66.7, 65.2, 61.8, 60.3, 44.6, 44.3; **HRMS(ESI-TOF)** m/z:  $[M + Na]^+$   $C_{25}H_{18}ClN_3NaO_4$  calcd. 482.0884, found, 482.0844.

**1'-Methyl-2-((4-nitrophenyl)amino)spiro[cyclopentane-1,3'-indolin]-3-ene-2',5-dione(26).**



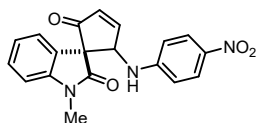

Following the general procedure, reaction of 3-(furan-2-yl)-3-hydroxy-1-methylindolin-2-one **1h** (0.050 g, 0.22 mmol, 1.0 equiv) and 4-nitroaniline **2f** (0.060 g, 0.44 mmol, 2.0 equiv) in presence of PMA (0.08 g, 0.043 mmol) delivered spirooxindole **26**, which was purified by silica gel column chromatography (Hexane:EtOAc 8:2) to furnish the title compound (brown solid) in 69% (0.053g) yield as inseparable mixture of diastereomers (1.6:1 *dr*).  $R_f$  0.3 (EtOAc: Hexane 2:8); mp. 164-166 °C.  $^1\text{H NMR}$  (400 MHz,  $\text{CDCl}_3$ )  $\delta$  7.93 - 7.86 (m, 5H), 7.40 - 7.36 (m, 1.87H), 7.25 - 7.21 (m, 0.8 H), 7.16 (d,  $J = 4.3$  Hz, 2H), 6.96 - 6.95 (m, 1.1H), 6.84 (d,  $J = 7.8$  Hz, 1.1H), 6.76 (d,  $J = 7.9$  Hz, 0.68H), 6.57 (dd,  $J = 5.6, 1.8$  Hz, 1.57H), 6.40 (d,  $J = 9.1$  Hz, 2H), 6.35 (d,  $J = 9.1$  Hz, 1.1H), 5.68 (d,  $J = 10.3$  Hz, 0.89H), 5.37 (d,  $J = 9.5$  Hz, 0.68 H), 5.25 (d,  $J = 10.3$  Hz, 1H), 4.81 (d,  $J = 9.6$  Hz, 0.65H), 3.20 (s, 2.33H), 3.06 (s, 3H);  $^{13}\text{C}\{^1\text{H}\}$  NMR (100 MHz,  $\text{CDCl}_3$ )  $\delta$  199.6, 199.5, 173.8, 171.2, 162.0, 151.3, 151.1, 145.1, 144.4, 139.2, 135.3, 129.8, 129.7, 128.1, 126.4, 126.0(2), 124.4, 123.8, 123.5, 122.9, 122.2, 113.4, 112.6, 112.5, 112.2, 109.3(2), 66.1, 66.0, 61.8, 60.6, 26.9, 26.6; **HRMS (ESI-TOF)**  $m/z$ :  $[\text{M} + \text{Na}]^+$   $\text{C}_{19}\text{H}_{15}\text{N}_3\text{NaO}_4$  calcd. 372.0960, found, 372.0971.

**1'-Allyl-2-((4-nitrophenyl)amino)spiro[cyclopentane-1,3'-indolin]-3-ene-2',5-dione(27).**

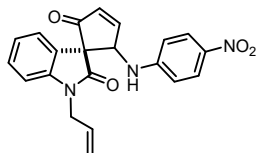

Following the general procedure, reaction of 1-allyl-3-(furan-2-yl)-3-hydroxyindolin-2-one **1i** (0.050 g, 0.196 mmol, 1.0 equiv) and 4-nitroaniline **2f** (0.05 g, 0.39 mmol, 2.0 equiv) in presence of PMA (0.072g, 0.039 mmol) delivered spirooxindole **27**, which was purified by silica gel column chromatography (Hexane: EtOAc 8:2) to furnish the title compound (yellow solid) in 59% (0.044g) yield as inseparable mixture of diastereomers (>20:1 *dr*).  $R_f$  0.3 (EtOAc: Hexane 2:8); mp. 174-176 °C.  $^1\text{H NMR}$  (400 MHz,  $\text{DMSO}-d_6$ )  $\delta$  8.12 (dd,  $J = 5.6, 1.9$  Hz, 1H), 7.93 (d,  $J = 8.7$  Hz, 1H), 7.75 (d,  $J = 8.9$  Hz, 2H), 7.41 (d,  $J = 7.3$  Hz, 1H), 7.36 (t,  $J = 7.7$  Hz, 1H), 7.15 (t,  $J = 7.5$  Hz, 1H), 6.91 (d,  $J = 7.8$  Hz, 1H), 6.68 (dd,  $J = 5.6, 1.8$  Hz, 1H), 6.34 (s, 2H), 5.51 (d,  $J = 8.7$  Hz, 1H), 5.39 (ddd,  $J = 15.3, 9.9, 4.7$  Hz, 1H), 4.77 (dd,  $J = 20.6, 14.0$  Hz, 2H), 4.24 - 4.16 (m, 1H), 4.06 (dd,  $J = 16.7, 4.9$  Hz, 1H);  $^{113}\text{C}\{^1\text{H}\}$  NMR (100 MHz,  $\text{DMSO}-d_6$ )  $\delta$  200.8, 169.8, 164.9,

153.0, 143.4, 136.7, 133.8, 130.9, 129.0, 128.3, 125.6, 123.0, 122.9, 116.1, 109.4, 66.6, 61.8, 41.4;  
**HRMS (ESI-TOF)** m/z:  $[M + Na]^+$  C<sub>21</sub>H<sub>17</sub>N<sub>3</sub>NaO<sub>4</sub> calcd. 398.1117, found, 398.1112.

**2-((4-acetylphenyl)amino)spiro[cyclopent[3]ene-1,3'-indoline]-2',5-dione(**28**):**

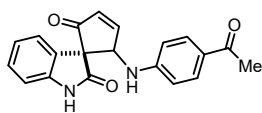

Following the general procedure, reaction of compound **1j** (0.05 g, 0.23 mmol, 1.0 equiv) and 1-(4-aminophenyl)ethan-1-one **2g** (0.063 g, 0.46 mmol, 2.0 equiv) in presence of PMA (0.084 g, 0.046 mmol) delivered spirooxindole **28**, which was purified by silica gel column chromatography (Hexane: EtOAc 5:5) to furnish the title compound (red semi solid) in 51% (0.042 g) yield as inseparable mixture of diastereomers (3:1 *dr*). *R<sub>f</sub>* 0.25 (EtOAc: Hexane 6:4); **<sup>1</sup>H NMR** (800 MHz, DMSO-*d*<sub>6</sub>) δ 10.71 (s, 0.37H), 10.53 (s, 1H), 8.21 (d, *J* = 3.1 Hz, 0.32H), 8.06 (d, *J* = 3.8 Hz, 1H), 7.55 (d, *J* = 8.2 Hz, 0.72H), 7.49 (d, *J* = 8.0 Hz, 2H), 7.39 (d, *J* = 8.6 Hz, 0.38H), 7.33 (d, *J* = 6.9 Hz, 1H), 7.27 (m, 2H), 7.09 - 7.05 (m, 1.62H), 6.80 (d, *J* = 7.5 Hz, 1H) 6.74 (d, *J* = 7.3 Hz, 0.32H), 6.63 - 6.61 (m, 1H), 6.34 - 6.32 (m, 2.41H), 5.35 (d, *J* = 8.1 Hz, 1H), 5.13 (d, *J* = 8.0 Hz, 0.32H), 2.33 (s, 4H). **<sup>13</sup>C{<sup>1</sup>H} NMR** (200 MHz, DMSO-*d*<sub>6</sub>) δ 201.6, 201.5, 195.3, 175.6, 172.0, 166.0, 165.5, 151.3, 151.1, 143.5, 143.1, 133.5, 133.2, 130.3, 130.1, 129.5, 129.0, 128.5, 126.1, 125.9, 125.8, 124.8, 123.2, 122.2, 121.4, 109.7(2), 67.1, 66.3, 62.1, 60.0, 26.0 (2); **HRMS(ESI-TOF)** m/z:  $[M + Na]^+$  C<sub>20</sub>H<sub>16</sub>N<sub>2</sub>NaO<sub>3</sub> calcd. 355.1035, found, 355.1059.

**General procedure for *carbo*-Piancatelli rearrangement: synthesis of compounds 30-40.**

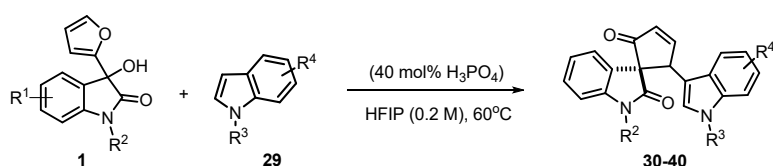

To a solution of compound **1** (1.0 equiv) and indole derivative (**29** 2.0 equiv) in HFIP (0.2 M), was added H<sub>3</sub>PO<sub>4</sub> (40 mol%). The reaction mixture was stirred at 60 °C (sealed tube was used) and the progress of the reaction was monitored by TLC analysis. After completion of the reaction (1-3 h), HFIP was removed under the reduced pressure. The crude residue was diluted in ethyl acetate and washed with water (three times) and brine. Combined organic layer dried over anhydrous Na<sub>2</sub>SO<sub>4</sub> and filtered. Solvent was removed under vacuo and the crude residue was purified by silica gel column chromatography using Hex-EtOAc as eluent to obtain the desired indolo-spirooxindole derivative **30-40**.

**1'-Benzyl-2-(1H-indol-3-yl)spiro[cyclopentane-1,3'-indolin]-3-ene-2',5-dione (30).**

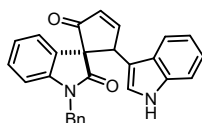

Following the general procedure, reaction of 1-benzyl-3-(furan-2-yl)-3-hydroxyindolin-2-one **1a** (0.030 g, 0.098 mmol, 1.0 equiv) and 1H-indole **29a** (0.023 g, 0.196 mmol, 2.0 equiv) in presence of H<sub>3</sub>PO<sub>4</sub> (0.004 g, 0.041 mmol) delivered compound **30**, which was purified by silica gel column chromatography (Hexane: EtOAc 6:4) to furnish the title compound as brown solid in 74% (0.030g) yield. *R<sub>f</sub>* 0.3 (EtOAc: Hexane 4:6); mp. 155-157 °C; **FT-IR** ( $\nu$  cm<sup>-1</sup>): 3363, 2927, 2854, 1717, 1694, 1613, 1488, 1468, 1454, 1356, 1159, 1101; **<sup>1</sup>H NMR** (400 MHz, DMSO-*d*<sub>6</sub>)  $\delta$  11.06 (s, 1H), 8.42 (d, *J* = 5.0 Hz, 1H), 7.58 (d, *J* = 7.1 Hz, 1H), 7.37 (d, *J* = 8.0 Hz, 1H), 7.23 (t, 1H), 7.17 - 7.13 (m, 2H), 7.05-6.99 (m, 2H), 6.88 (t, *J* = 7.3 Hz, 2H), 6.68 - 6.59 (m, 4H), 6.40 (d, *J* = 7.3 Hz, 2H), 5.15 (s, 1H), 4.71 (d, *J* = 16.3 Hz, 1H), 4.42 (d, *J* = 16.3 Hz, 1H); **<sup>13</sup>C{<sup>1</sup>H} NMR** (100 MHz, DMSO-*d*<sub>6</sub>)  $\delta$  203.4, 171.1, 169.0, 143.8, 135.8, 135.2, 132.2, 128.8, 128.7, 128.1, 126.7(2), 126.0, 124.6, 123.6, 122.7, 121.0, 118.6, 117.8, 111.4, 109.7, 109.0, 67.6, 48.8, 42.3; **HRMS(ESI-TOF)** *m/z*: [M + Na]<sup>+</sup> C<sub>27</sub>H<sub>20</sub>N<sub>2</sub>NaO<sub>2</sub> calcd. 427.1422, found, 427.1429.

**1'-Benzyl-2-(1-methyl-1H-indol-3-yl)spiro[cyclopentane-1,3'-indolin]-3-ene-2',5-dione (31).**

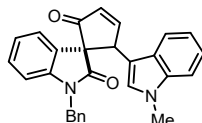

Following the general procedure, reaction of 1-benzyl-3-(furan-2-yl)-3-hydroxyindolin-2-one **1a** (0.050 g, 0.163 mmol, 1.0 equiv) and 1-methyl-1H-indole **29b** (0.044 g, 0.33 mmol, 2.0 equiv) in

presence of H<sub>3</sub>PO<sub>4</sub> (0.007 g, 0.07 mmol) delivered compound **31**, which was purified by silica gel column chromatography (Hexane:EtOAc 7:3) to furnish the title compound as brown semi solid in 61% (0.042 g) yield. *R<sub>f</sub>* 0.25 (EtOAc: Hexane 3:7); mp. 163-165 °C; **FT-IR** (ν cm<sup>-1</sup>): 3057, 3016, 2926, 1725, 1696, 1613, 1491, 1468, 1358, 1231, 1159; **<sup>1</sup>H NMR** (400 MHz, CDCl<sub>3</sub>) δ 8.13 (dd, *J* = 5.6, 1.8 Hz, 1H), 7.37 (d, *J* = 6.7 Hz, 1H), 7.30 (d, *J* = 8.2 Hz, 1H), 7.21-7.14 (m, 3H), 7.07 (s, 1H), 7.03 (t, *J* = 7.4 Hz, 1H), 6.88 - 6.81 (m, 3H), 6.68 (d, *J* = 8.0 Hz, 1H), 6.60 (dd, *J* = 5.6, 2.5 Hz, 1H), 6.47 (d, *J* = 7.6 Hz, 1H), 6.33 (d, *J* = 7.6 Hz, 2H), 5.02 (s, 1H), 4.91 (d, *J* = 16.2 Hz, 1H), 4.29 (d, *J* = 16.2 Hz, 1H), 3.73 (s, 3H); **<sup>13</sup>C{<sup>1</sup>H} NMR** (100 MHz, CDCl<sub>3</sub>) δ 203.4, 171.6, 166.4, 144.3, 136.7, 135.0, 133.5, 129.2, 128.8, 128.6, 128.5, 127.5, 127.0, 126.2, 123.2, 123.1, 121.9, 119.6, 118.5, 109.7, 109.5, 109.4, 68.0, 49.7, 43.7, 33.0; **HRMS (ESI-TOF)** *m/z*: [M + Na]<sup>+</sup> C<sub>28</sub>H<sub>22</sub>N<sub>2</sub>NaO<sub>2</sub> calcd. 441.1579, found, 441.1594.

**1'-Benzyl-2-(5-methyl-1H-indol-3-yl)spiro[cyclopentane-1,3'-indolin]-3-ene-2',5-dione(32).**

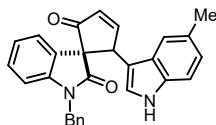

Following the general procedure, reaction of 1-benzyl-3-(furan-2-yl)-3-hydroxyindolin-2-one **1a** (0.050 g, 0.163 mmol, 1.0 equiv) and 5-methyl-1H-indole **29c** (0.044 g, 0.3275 mmol, 2.0 equiv) in presence of H<sub>3</sub>PO<sub>4</sub> (0.007 g, 0.07 mmol) delivered compound **32**, which was purified by silica gel column chromatography (Hexane:EtOAc 6:4) to furnish the title compound as brown solid in 60% (0.041g) yield. *R<sub>f</sub>* 0.3 (EtOAc: Hexane 4:6); mp. 232-234 °C; **FT-IR** (ν cm<sup>-1</sup>): 3328, 2922, 1717, 1687, 1610, 1491, 1466, 1362, 1160; **<sup>1</sup>H NMR** (400 MHz, DMSO-*d*<sub>6</sub>) δ 10.89 (s, 1H), 8.44-8.43 (m, 1H), 7.58 (d, *J* = 7.2 Hz, 1H), 7.26 - 7.22 (m, 2H), 7.17 (t, *J* = 7.4 Hz, 1H), 7.12 (s, 1H), 7.05 (t, *J* = 7.2 Hz, 1H), 6.91 (t, *J* = 7.5 Hz, 2H), 6.83 (d, *J* = 8.1 Hz, 1H), 6.62-6.60 (m, 2H), 6.41 (d, *J* = 7.4 Hz, 2H), 6.25 (s, 1H), 5.09 (s, 1H), 4.70 (d, *J* = 16.3 Hz, 1H), 4.41 (d, *J* = 16.3 Hz, 1H), 1.99 (s, 3H); **<sup>13</sup>C{<sup>1</sup>H} NMR** (100 MHz, DMSO-*d*<sub>6</sub>) δ 203.4, 171.1, 168.8, 144.0, 135.3, 134.2, 132.2, 128.9, 128.6, 128.2, 126.8(2), 126.7, 126.0, 124.3, 123.7, 122.6(2), 117.9, 111.0, 109.4, 109.0, 67.6, 49.1, 42.4, 21.1; **HRMS (ESI-TOF)** *m/z*: [M + Na]<sup>+</sup> C<sub>28</sub>H<sub>22</sub>N<sub>2</sub>NaO<sub>2</sub> calcd. 441.1579, found, 441.1603.

**1'-Benzyl-2-(5-methoxy-1H-indol-3-yl)spiro[cyclopentane-1,3'-indolin]-3-ene-2',5-dione (33).**

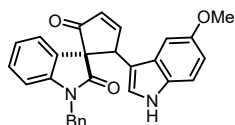

Following the general procedure, reaction of 1-benzyl-3-(furan-2-yl)-3-hydroxyindolin-2-one **1a** (0.050 g, 0.163 mmol, 1.0 equiv) and 5-methoxy-1H-indole **29d** (0.048 g, 0.33 mmol, 2.0 equiv) in presence of H<sub>3</sub>PO<sub>4</sub> (0.007 g, 0.07 mmol) delivered compound **33**, which was purified by silica gel column chromatography (Hexane:EtOAc 6:4) to furnish the title compound as brown solid in 67% (0.048g) yield. *R<sub>f</sub>* 0.3 (EtOAc: Hexane 4:6); mp. 185-187 °C; **FT-IR** ( $\nu$  cm<sup>-1</sup>): 3328, 2953, 2927, 2855, 1719, 1693, 1609, 1488, 1468, 1358, 1211; **<sup>1</sup>H NMR** (400 MHz, DMSO-*d*<sub>6</sub>)  $\delta$  10.87 (s, 1H), 8.45 (dd, *J* = 5.5, 1.6 Hz, 1H), 7.62 (d, *J* = 7.2 Hz, 1H), 7.23 (t, *J* = 7.6 Hz, 2H), 7.18-7.14 (m, 2H), 7.04 (t, *J* = 7.3 Hz, 1H), 6.89 (t, *J* = 7.6 Hz, 2H), 6.64-6.60 (m, 3H), 6.38 (d, *J* = 7.5 Hz, 2H), 5.93 (d, *J* = 1.6 Hz, 1H), 5.12 (s, 1H), 4.74 (d, *J* = 16.3 Hz, 1H), 4.42 (d, *J* = 16.3 Hz, 1H), 3.17 (s, 3H); **<sup>13</sup>C{<sup>1</sup>H} NMR** (100 MHz, DMSO-*d*<sub>6</sub>)  $\delta$  203.3, 170.9, 168.8, 153.0, 144.0, 135.2, 132.2, 130.8, 128.9, 128.6, 128.1, 126.8, 126.7, 125.9, 124.7, 123.7, 122.5, 112.1, 111.7, 109.8, 109.2, 99.1, 67.6, 54.4, 48.9, 42.4; **HRMS (ESI-TOF)** *m/z*: [M + Na]<sup>+</sup> C<sub>28</sub>H<sub>22</sub>N<sub>2</sub>NaO<sub>3</sub> calcd. 457.1528, found, 457.1550.

**1'-Benzyl-2-(5-nitro-1H-indol-3-yl)spiro[cyclopentane-1,3'-indolin]-3-ene-2',5-dione (34).**

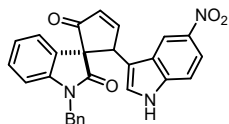

Following the general procedure, reaction of 1-benzyl-3-(furan-2-yl)-3-hydroxyindolin-2-one **1a** (0.050 g, 0.163 mmol, 1.0 equiv) and 5-nitro-1H-indole **29e** (0.053 g, 0.33 mmol, 2.0 equiv) in presence of H<sub>3</sub>PO<sub>4</sub> (0.007 g, 0.07 mmol) delivered compound **34**, which was purified by silica gel column chromatography (Hexane/EtOAc 6:4) to furnish the title compound as brown solid in 71% (0.052g) yield. *R<sub>f</sub>* 0.3 (EtOAc: Hexane 4:6); mp. 215-217 °C; **FT-IR** ( $\nu$  cm<sup>-1</sup>): 3353, 2925, 1697, 1613, 1517, 1466, 1335; **<sup>1</sup>H NMR** (400 MHz, DMSO-*d*<sub>6</sub>)  $\delta$  11.81 (s, 1H), 8.49 (dd, *J* = 5.6, 1.9 Hz, 1H), 7.90 (dd, *J* = 9.0, 2.0 Hz, 1H), 7.63 (d, *J* = 7.2 Hz, 1H), 7.54-7.52 (m, 2H), 7.46 (d, *J* = 1.8 Hz, 1H), 7.27 (t, *J* = 7.6 Hz, 1H), 7.21 (t, *J* = 7.4 Hz, 1H), 7.04 (t, *J* = 7.4 Hz, 1H), 6.88 (t, *J* = 7.6 Hz, 2H), 6.70-6.67 (m, 2H), 6.39 (d, *J* = 7.5 Hz, 2H), 5.26 (s, 1H), 4.69 (d, *J* = 16.1 Hz, 1H), 4.40 (d, *J* = 16.1 Hz, 1H); **<sup>13</sup>C{<sup>1</sup>H} NMR** (100 MHz, DMSO-*d*<sub>6</sub>)  $\delta$  202.9, 171.0, 168.0, 143.7,

140.3, 139.1, 135.3, 132.6, 129.0, 128.3, 128.2, 128.1, 126.9, 126.1, 125.8, 123.8, 122.9, 116.5, 115.6, 112.8, 112.0, 109.2, 67.3, 48.4, 42.5; **HRMS(ESI-TOF)**  $m/z$ :  $[M + Na]^+$   $C_{27}H_{19}N_3NaO_4$  calcd. 472.1273, found, 472.1298.

**1'-Benzyl-2-(6-bromo-1H-indol-3-yl)spiro[cyclopentane-1,3'-indolin]-3-ene-2',5-dione(35).**

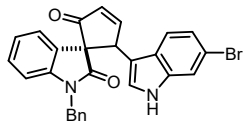

Following the general procedure, reaction of 1-benzyl-3-(furan-2-yl)-3-hydroxyindolin-2-one **1a** (0.050 g, 0.163 mmol, 1.0 equiv) and 5-bromo-1H-indole **29f** (0.065g, 0.33 mmol, 2.0 equiv) in presence of  $H_3PO_4$  (0.007 g, 0.07 mmol) delivered compound **35**, which was purified by silica gel column chromatography (Hexane/EtOAc 6:4) to furnish the title compound as brown solid in 71% (0.056g) yield.  $R_f$  0.25 (EtOAc: Hexane 3:7); mp. 181-182 °C; **FT-IR** ( $\nu$   $cm^{-1}$ ): 3335, 2925, 1718, 1695, 1613, 1491, 1466, 1454, 1355, 1222, 1157;  **$^1H$  NMR** (400 MHz,  $DMSO-d_6$ )  $\delta$  11.21 (s, 1H), 8.42 (dd,  $J = 5.6, 1.6$  Hz, 1H), 7.57-7.55 (m, 2H), 7.27-7.21 (m, 2H), 7.15 (t,  $J = 7.4$  Hz, 1H), 7.08 (t,  $J = 7.3$  Hz, 1H), 6.93 (t,  $J = 7.6$  Hz, 2H), 6.77 (d,  $J = 8.4$  Hz, 1H), 6.65-6.62 (m, 2H), 6.47 (d,  $J = 8.4$  Hz, 1H), 6.38 (d,  $J = 7.5$  Hz, 2H), 5.13 (s, 1H), 4.73 (d,  $J = 16.2$  Hz, 1H), 4.41 (d,  $J = 16.2$  Hz, 1H);  **$^{13}C\{^1H\}$  NMR** (100 MHz,  $DMSO-d_6$ )  $\delta$  203.2, 171.0, 168.5, 143.7, 136.7, 135.3, 132.4, 128.8, 128.6, 128.1, 126.8, 126.0, 125.6, 123.6, 122.7, 121.4, 119.6, 114.1, 113.9, 110.1, 109.1, 67.4, 48.6, 42.4; **HRMS (ESI-TOF)**  $m/z$ :  $[M + Na]^+$   $C_{27}H_{19}BrN_2NaO_2$  calcd. 505.0528, found, 505.0557

**1'-Benzyl-2-(1H-indol-3-yl)-5'-methylspiro[cyclopentane-1,3'-indolin]-3-ene-2',5-dione (36).**

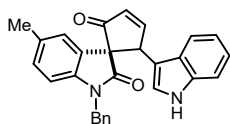

Following the general procedure, reaction of 1-benzyl-3-(furan-2-yl)-3-hydroxy-5-methylindolin-2-one **1c** (0.032 g, 0.10 mmol, 1.0 equiv) and 1H-indole **29a** (0.024 g, 0.20 mmol, 2.0 equiv) in presence of  $H_3PO_4$  (0.004 g, 0.04 mmol) delivered compound **36** (reaction time: 3h), which was purified by silica gel column chromatography (Hexane: EtOAc 6:4) to furnish the title compound

as brown solid in 75% (0.031g) yield.  $R_f$  0.3 (EtOAc: Hexane 4:6); mp. 222-223 °C; **FT-IR** ( $\nu$   $\text{cm}^{-1}$ ): 3330, 2925, 1721, 1689, 1621, 1602, 1497, 1457, 1437, 1344, 1191, 1143;  **$^1\text{H}$  NMR** (400 MHz, DMSO- $d_6$ )  $\delta$  11.04 (s, 1H), 8.41 (d,  $J$  = 3.8 Hz, 1H), 7.37-7.35 (m, 2H), 7.16 (s, 1H), 7.03 (s, 3H), 6.88 (t,  $J$  = 6.5 Hz, 2H), 6.71 - 6.62 (m, 3H), 6.46 (dd,  $J$  = 26.5, 7.1 Hz, 3H), 5.10 (s, 1H), 4.67 (d,  $J$  = 16.1 Hz, 1H), 4.39 (d,  $J$  = 16.3 Hz, 1H), 2.34 (s, 3H);  **$^{13}\text{C}\{^1\text{H}\}$  NMR** (100 MHz, DMSO- $d_6$ )  $\delta$  203.7, 171.1, 169.0, 141.4, 135.8, 135.3, 132.1, 131.7, 128.9, 128.8, 128.1, 126.7, 126.0, 124.5, 124.0, 121.0, 118.6, 117.9, 111.4, 109.8, 108.8, 67.4, 48.9, 42.3, 20.8; **HRMS(ESI-TOF)**  $m/z$ :  $[\text{M} + \text{Na}]^+$   $\text{C}_{28}\text{H}_{22}\text{N}_2\text{NaO}_2$  calcd. 441.1579, found, 441.1577.

**1'-Benzyl-2-(1H-indol-3-yl)-5'-methoxyspiro[cyclopentane-1,3'-indolin]-3-ene-2',5-dione (37).**

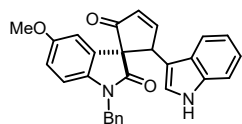

Following the general procedure, reaction of 1-benzyl-3-(furan-2-yl)-3-hydroxy-5-methoxyindolin-2-one **1d** (0.040 g, 0.12 mmol, 1.0 equiv) and 1H-indole **29a** (0.028g, 0.24 mmol, 2.0 equiv) in presence of  $\text{H}_3\text{PO}_4$  (0.005 g, 0.05 mmol) delivered compound **37** (reaction time: 3h), which was purified by silica gel column chromatography (Hexane: EtOAc 6:4) to furnish the title compound as brown solid in 64% (0.033g) yield.  $R_f$  0.3 (EtOAc: Hexane 4:6); mp. 185-186 °C.  **$^1\text{H}$  NMR** (400 MHz, DMSO- $d_6$ )  $\delta$  11.05 (s, 1H), 8.41-8.40 (m, 1H), 7.37 (d,  $J$  = 8.1 Hz, 1H), 7.29 (s, 1H), 7.17 (s, 1H), 7.03-7.00 (m, 2H), 6.87 (t,  $J$  = 7.4 Hz, 2H), 6.80-6.78 (m, 1H), 6.72-6.66 (m, 2H), 6.62-6.61 (m, 1H), 6.49 (d,  $J$  = 8.5 Hz, 1H), 6.39 (d,  $J$  = 7.5 Hz, 2H), 5.17 (s, 1H), 4.68 (d,  $J$  = 16.3 Hz, 1H), 4.38 (d,  $J$  = 16.3 Hz, 1H), 3.77 (s, 3H);  **$^{13}\text{C}\{^1\text{H}\}$  NMR** (100 MHz, DMSO- $d_6$ )  $\delta$  203.5, 170.9, 169.0, 155.7, 137.1, 135.8, 135.4, 132.1, 130.0, 128.1, 126.7(2), 126.0, 124.6, 121.0, 118.6, 117.9, 113.3, 111.4, 110.7, 109.8, 109.4, 68.0, 55.7, 48.8, 42.4; **HRMS(ESI-TOF)**  $m/z$ :  $[\text{M} + \text{Na}]^+$   $\text{C}_{28}\text{H}_{22}\text{N}_2\text{NaO}_3$  calcd. 457.1528, found, 457.1551.

**1'-Benzyl-7'-chloro-2-(1H-indol-3-yl)spiro[cyclopentane-1,3'-indolin]-3-ene-2',5-dione(38).**

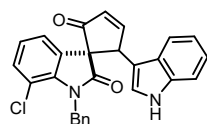



Following the general procedure, reaction of 1-benzyl-7-chloro-3-(furan-2-yl)-3-hydroxyindolin-2-one **1g** (0.055 g, 0.16 mmol, 1.0 equiv) and 1H-indole **29a** (0.038g, 0.32 mmol, 2.0 equiv) in presence of H<sub>3</sub>PO<sub>4</sub> (0.007 g, 0.06 mmol) delivered compound **38** (reaction time: 3h), which was purified by silica gel column chromatography (Hexane:EtOAc 6:4) to furnish the title compound as brown solid in 58% (0.041g) yield. *R<sub>f</sub>* 0.3 (EtOAc: Hexane 4:6); mp. 204-205 °C. **<sup>1</sup>H NMR** (400 MHz, DMSO-*d*<sub>6</sub>) δ 11.09 (s, 1H), 8.44 (d, *J* = 4.8 Hz, 1H), 7.65 (d, *J* = 7.0 Hz, 1H), 7.39 (d, *J* = 7.9 Hz, 1H), 7.28 (d, *J* = 7.8 Hz, 1H), 7.22 -7.18(m, 2H), 7.06 - 6.98 (m, 2H), 6.84 -6.74 (m, 3H), 6.67 (d, *J* = 11.0 Hz, 2H), 6.25 (d, *J* = 7.0 Hz, 2H), 5.23 (s, 1H), 4.90-4.89 (m, 2H); **<sup>13</sup>C{<sup>1</sup>H} NMR** (100 MHz, DMSO-*d*<sub>6</sub>) δ 202.4, 171.5, 169.3, 139.6, 136.7, 135.8, 131.8, 131.65, 130.9, 128.0, 126.6, 126.3, 125.0, 124.8, 124.2, 122.9, 121.1, 118.7, 117.7, 113.8, 111.6, 109.3, 67.6, 49.0, 43.9; **HRMS (ESI-TOF)** *m/z*: [M + Na]<sup>+</sup> C<sub>27</sub>H<sub>19</sub>ClN<sub>2</sub>NaO<sub>2</sub> calcd. 461.1033, found, 461.0994.

### 2-(1H-indol-3-yl)-1'-methylspiro[cyclopentane-1,3'-indolin]-3-ene-2',5-dione (**39**).

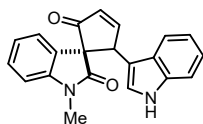

Following the general procedure, reaction of 3-(furan-2-yl)-3-hydroxy-1-methylindolin-2-one **1h** (0.050 g, 0.22 mmol, 1.0 equiv) and 1H-indole **29a** (0.051g, 0.44 mmol, 2.0 equiv) in presence of H<sub>3</sub>PO<sub>4</sub> (0.009 g, 0.09 mmol) delivered compound **39**, which was purified by silica gel column chromatography (Hexane:EtOAc 6:4) to furnish the title compound as brown solid in 58% (0.042g) yield. *R<sub>f</sub>* 0.3 (EtOAc: Hexane 4:6); mp. 168-169 °C. **<sup>1</sup>H NMR** (400 MHz, DMSO-*d*<sub>6</sub>) δ 10.99 (s, 1.6H), 8.41 (dd, *J* = 5.6, 1.9 Hz, 1H), 7.49 (d, *J* = 7.3 Hz, 1H), 7.40-7.34 (m, 2H), 7.29 (d, *J* = 8.0 Hz, 1H), 7.19 - 7.15 (m, 3H), 7.01 (t, *J* = 7.5 Hz, 1H), 6.97-6.92 (m, 2H), 6.86 (d, *J* = 2.2 Hz, 0.69H), 6.80 (t, *J* = 7.4 Hz, 0.78H), 6.67 (t, *J* = 7.5 Hz, 1H), 6.59 (dd, *J* = 5.6, 2.4 Hz, 1H), 6.52 (d, *J* = 7.9 Hz, 1H), 5.03 (s, 1H), 3.26 (s, 0.85H), 2.72 (s, 3H); **<sup>13</sup>C{<sup>1</sup>H} NMR** (100 MHz, DMSO-*d*<sub>6</sub>) δ 203.5,176.9, 171.0, 168.9, 144.8, 142.8, 136.9, 135.8, 133.7, 132.0, 129.1, 128.9, 128.0, 126.6, 125.6, 124.6, 124.3(2), 123.2, 122.6, 122.2, 121.0(2), 120.7, 118.3, 117.6, 114.1, 111.6, 111.4, 110.0, 108.7, 108.5, 66.9, 52.2, 49.0, 26.3, 25.9; **HRMS (ESI-TOF)** *m/z*: [M + Na]<sup>+</sup> C<sub>21</sub>H<sub>16</sub>N<sub>2</sub>NaO<sub>2</sub> calcd. 351.1109, found, 351.1107.

### 1'-Allyl-2-(1H-indol-3-yl)spiro[cyclopentane-1,3'-indolin]-3-ene-2',5-dione(**40**).

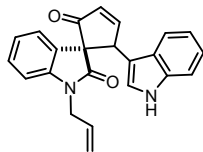

Following the general procedure, reaction of 1-allyl-3-(furan-2-yl)-3-hydroxyindolin-2-one **1i** (0.036 g, 0.1411 mmol, 1.0 equiv) and 1H-indole **29a** (0.034g, 0.28 mmol, 2.0 equiv) in presence of H<sub>3</sub>PO<sub>4</sub> (0.006 g, 0.06 mmol) delivered compound **40**, which was purified by silica gel column chromatography (Hexane:EtOAc 6:4) to furnish the title compound as brown solid in 69% (0.035g) yield. *R<sub>f</sub>* 0.3 (EtOAc: Hexane 4:6); mp. 209-210 °C. <sup>1</sup>H NMR (400 MHz, DMSO-*d*<sub>6</sub>) δ 10.97 (s, 1H), 8.41 (dd, *J* = 5.6, 1.8 Hz, 1H), 7.53 (d, *J* = 7.3 Hz, 1H), 7.33 (t, *J* = 7.7 Hz, 1H), 7.28 (d, *J* = 8.1 Hz, 1H), 7.17 (t, *J* = 7.5 Hz, 1H), 7.13 (d, *J* = 1.9 Hz, 1H), 6.94 (t, *J* = 7.5 Hz, 1H), 6.79 (d, *J* = 7.8 Hz, 1H), 6.64 (t, *J* = 7.5 Hz, 1H), 6.60 (dd, *J* = 5.6, 2.5 Hz, 1H), 6.49 (d, *J* = 7.9 Hz, 1H), 5.20-5.11(m, *J* = 15.0, 9.8, 4.5 Hz, 1H), 5.07 (s, 1H), 4.60 (d, *J* = 10.5 Hz, 1H), 4.33 (d, *J* = 17.3 Hz, 1H), 4.00 - 3.95 (m, 1H), 3.83 (dd, *J* = 16.9, 4.7 Hz, 1H); <sup>13</sup>C{<sup>1</sup>H} NMR (100 MHz, DMSO-*d*<sub>6</sub>) δ 203.5, 170.7, 168.7, 143.9, 135.8, 132.2, 130.8, 128.9, 128.7, 126.6, 124.3, 123.4, 122.5, 120.9, 118.3, 117.7, 115.6, 111.3, 109.8, 109.0, 67.2, 49.0, 41.1; HRMS (ESI-TOF) *m/z*: [M + Na]<sup>+</sup> C<sub>23</sub>H<sub>18</sub>N<sub>2</sub>NaO<sub>2</sub> calcd. 377.1266, found, 377.1261.

#### 1'-Benzyl-2-((2-fluorophenyl)amino)spiro[cyclopentane-1,3'-indoline]-2',5-dione (**41**).

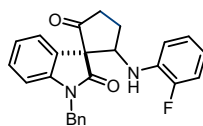

To a solution of compound **15** (0.070 g, 0.176 mmol, 1.0 equiv; used as diastereomeric mixture) in EtOAc (2.0 mL), was added 10% Pd/C (0.006 g) and the reaction flask was evacuated and backfilled with argon (three times). Next the same operation was performed with H<sub>2</sub> gas fitted with a balloon and left for 2 h. Upon completion of the reaction (TLC monitored), the mixture was passed through a pad of celite and concentrated under reduced pressure. The crude residue was purified by silica gel column chromatography (2:8 EtOAc:hexane) to afford compound **41** as colourless oil in 51% (0.036 g) yield as mixture of diastereomer. *R<sub>f</sub>* 0.5 (2:8 EtOAc:Hexane); <sup>1</sup>H NMR (400 MHz, CDCl<sub>3</sub>) δ 7.22 - 7.11 (m, 10H), 7.09- 7.00 (m, 6H), 6.91-6.86 (m, 2H), 6.83 - 6.77 (m, 2H), 6.66 (t, *J* = 7.7 Hz, 1H), 6.62- 6.59 (m, 1H), 6.56 - 6.50 (m, 3H), 6.29 (t, *J* = 8.4 Hz, 1H), 5.07-5.00 (m, 1H), 4.94 (d, *J* = 16.0 Hz, 1H), 4.84 (d, *J* = 16.0 Hz, 1H), 4.77- 4.70 (m, 3H),

4.58 (dd,  $J = 9.0, 2.3$  Hz, 1H), 3.98 (d,  $J = 10.6$  Hz, 1H), 2.97 - 2.85 (m, 2H), 2.81 - 2.76 (m, 2H), 2.71 - 2.60 (m, 3H), 2.22- 2.13 (m, 1H).  $^{13}\text{C}\{^1\text{H}\}$  NMR (100 MHz,  $\text{CDCl}_3$ )  $\delta$  210.1, 209.6, 175.1, 171.7, 144.2, 135.0(2), 134.7, 134.6(2), 134.4, 129.4, 129.2, 128.9(2), 127.6, 126.9, 126.8, 124.9, 124.8(2), 124.3(2), 123.4, 124.3, 123.4, 123.3, 123.0, 122.8, 118.3, 118.2, 118.0, 117.9, 114.9, 114.7(2), 114.5, 114.3(2), 113.8, 113.7, 110.4, 109.9, 68.3, 67.8, 60.6, 58.7, 44.2, 43.8, 38.4, 38.0, 29.5, 28.1. HRMS(ESI-TOF)  $m/z$ :  $[\text{M} + \text{Na}]^+$   $\text{C}_{25}\text{H}_{21}\text{FN}_2\text{NaO}_2$  calcd. 423.1485, found, 423.1501.

**1'-Benzyl-2-hydroxy-5-(1H-indol-3-yl)spiro[cyclopentane-1,3'-indolin]-3-en-2'-one (42).**

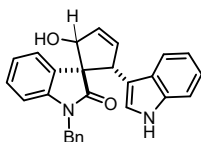

To a solution of compound **30** (0.040 g, 0.09 mmol, 1.0 equiv) in dry MeOH (1.0 mL, 0.1 M), was added  $\text{CeCl}_3 \cdot 7\text{H}_2\text{O}$  (0.018 g, 0.04 mmol, 0.5 equiv) at room temperature and the reaction was stirred at room temperature for 30 min. After that the reaction mixture was transferred to a chiller with set temperature of  $-20$  °C and  $\text{NaBH}_4$  (0.004g, 0.09 mmol) was added. The reaction mixture was stirred for 4h at the same temperature and then quenched with saturated aqueous solution of  $\text{NH}_4\text{Cl}$ . It was diluted EtOAc (10 mL) and washed with water and brine (10 mL x3). Combined organic layer was dried with anhydrous  $\text{Na}_2\text{SO}_4$  and concentrated in vacuo. Crude residue was purified by silica gel column chromatography (4:6 EtOAc/hexane) to afford compound **42** as colorless oil in 55 % (0.022 g) yield as a single detectable diastereomer.  $R_f$  0.25 (4:6 EtOAc:Hexane);  $^1\text{H}$  NMR (400 MHz,  $\text{CDCl}_3$ )  $\delta$  8.30 (s, 1H), 7.56 (d,  $J = 6.9$  Hz, 1H), 7.33 (d,  $J = 8.2$  Hz, 1H), 7.20 (t,  $J = 7.1$  Hz, 1H), 7.14 (td,  $J = 7.7, 1.0$  Hz, 1H), 7.08 (t,  $J = 7.7$  Hz, 1H), 7.04 (t,  $J = 7.4$  Hz, 1H), 7.00 (d,  $J = 2.3$  Hz, 1H), 6.89 (t,  $J = 7.7$  Hz, 2H), 6.75 (t,  $J = 7.5$  Hz, 1H), 6.53 (d,  $J = 8.0$  Hz, 1H), 6.35 (d,  $J = 7.6$  Hz, 1H), 6.26 (d,  $J = 7.5$  Hz, 2H), 6.15 (s, 2H), 5.35 (d,  $J = 11.3$  Hz, 1H), 4.90 (d,  $J = 16.2$  Hz, 1H), 4.71 (s, 1H), 4.20 (d,  $J = 16.2$  Hz, 1H), 3.08 (d,  $J = 11.7$  Hz, 1H).  $^{13}\text{C}\{^1\text{H}\}$  NMR (100 MHz,  $\text{CDCl}_3$ )  $\delta$  176.2, 143.5, 136.9, 135.1, 135.0, 133.9, 133.0, 128.6, 128.3, 126.9(2), 126.1, 123.7, 123.2, 122.4, 121.9, 119.6, 118.6, 113.8, 111.2, 109.5, 84.8, 66.3, 52.7, 52.3, 43.4. HRMS(ESI-TOF)  $m/z$ :  $[\text{M} + \text{Na}]^+$   $\text{C}_{27}\text{H}_{22}\text{N}_2\text{NaO}_2$  calcd. 429.1579, found, 429.1586.

5. Stereochemical analysis of compound 31 by heteronuclear coupling constant between the C1-carbon and the proton at C3 *via* non-decoupling  $^{13}\text{C}$ NMR.

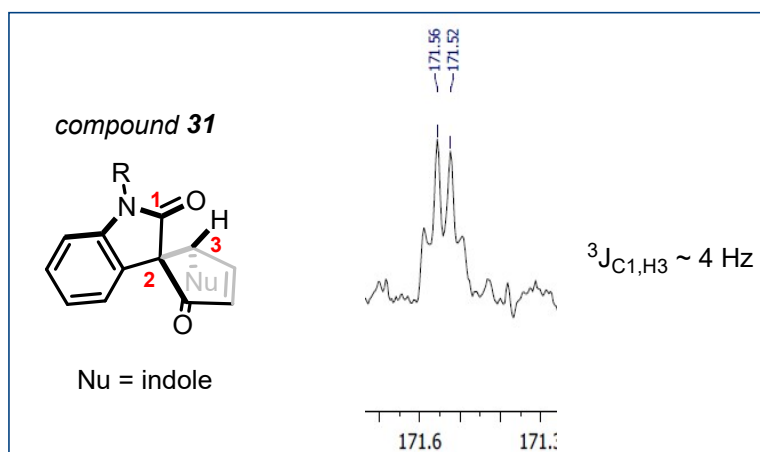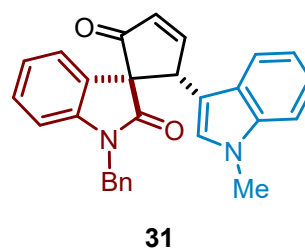

## 6. NMR spectra of new compound

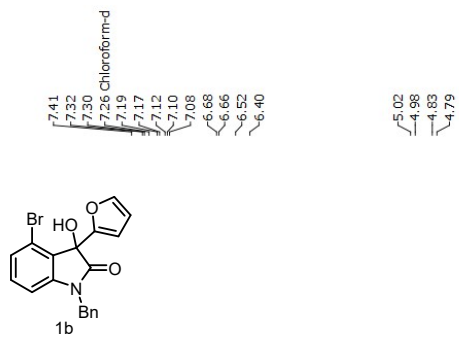

<sup>1</sup>H NMR, CDCl<sub>3</sub>, 400 MHz

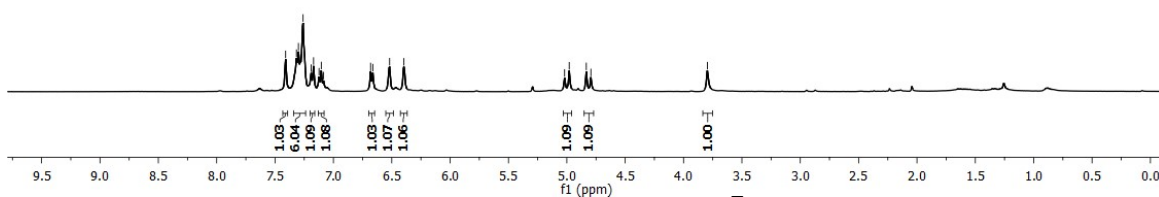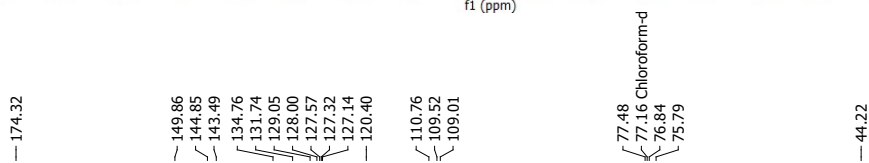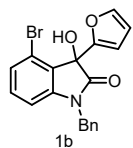

<sup>13</sup>C NMR, CDCl<sub>3</sub>, 100 MHz

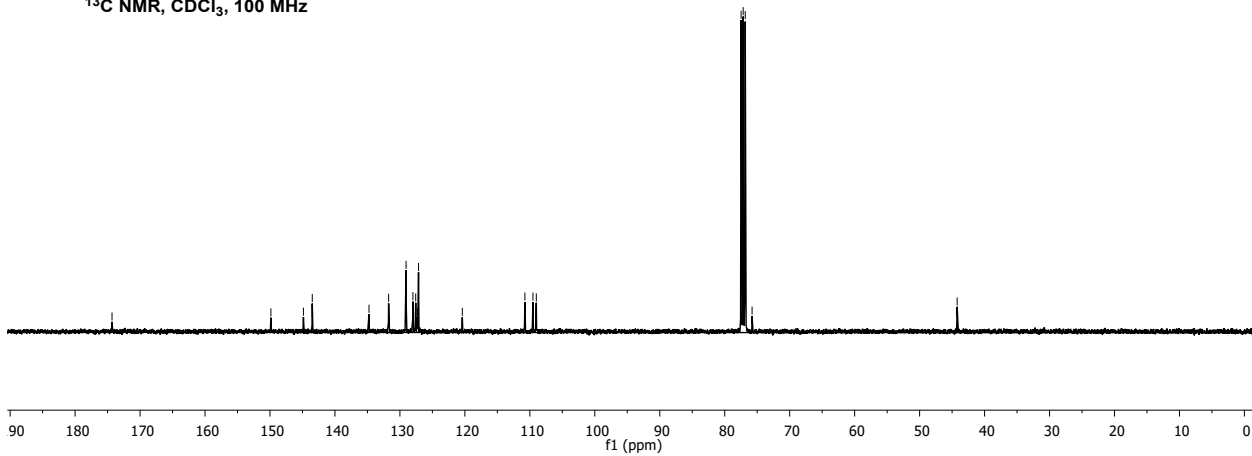

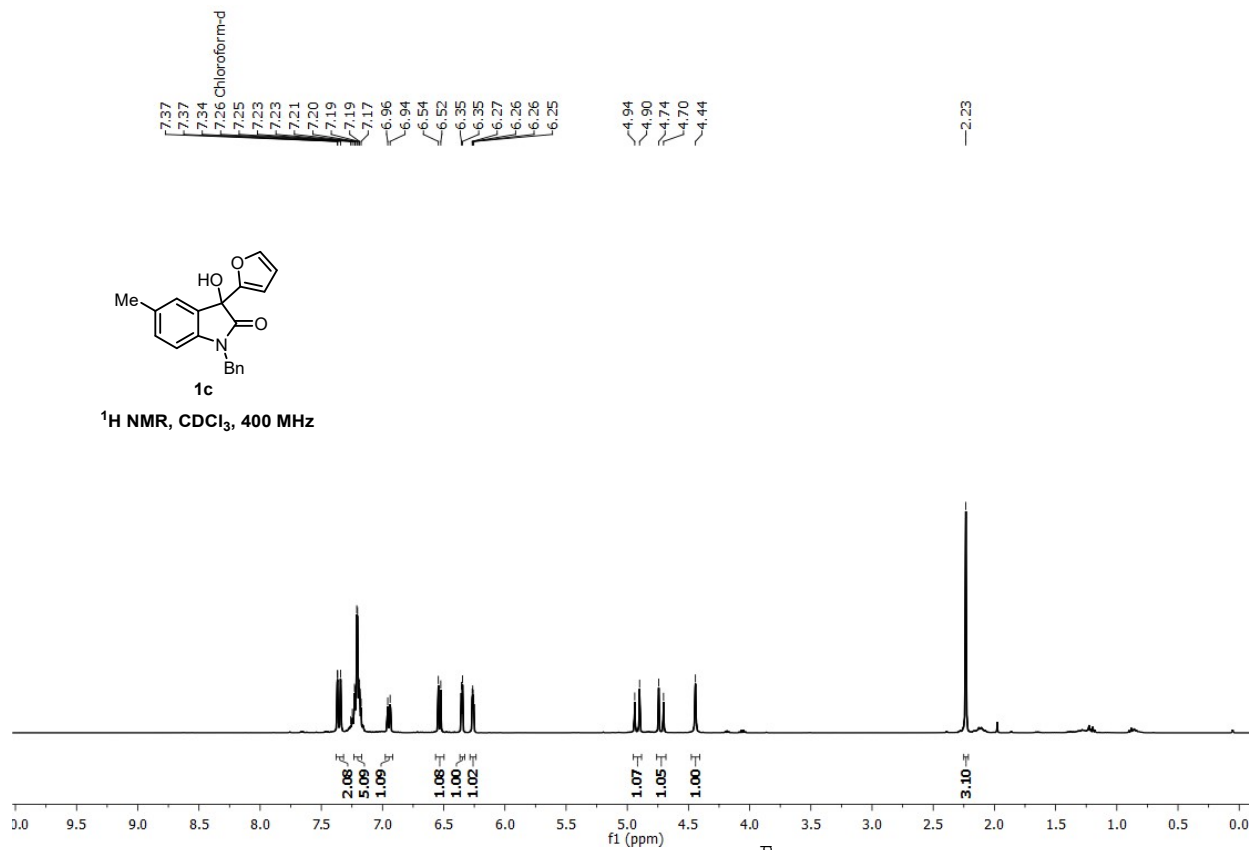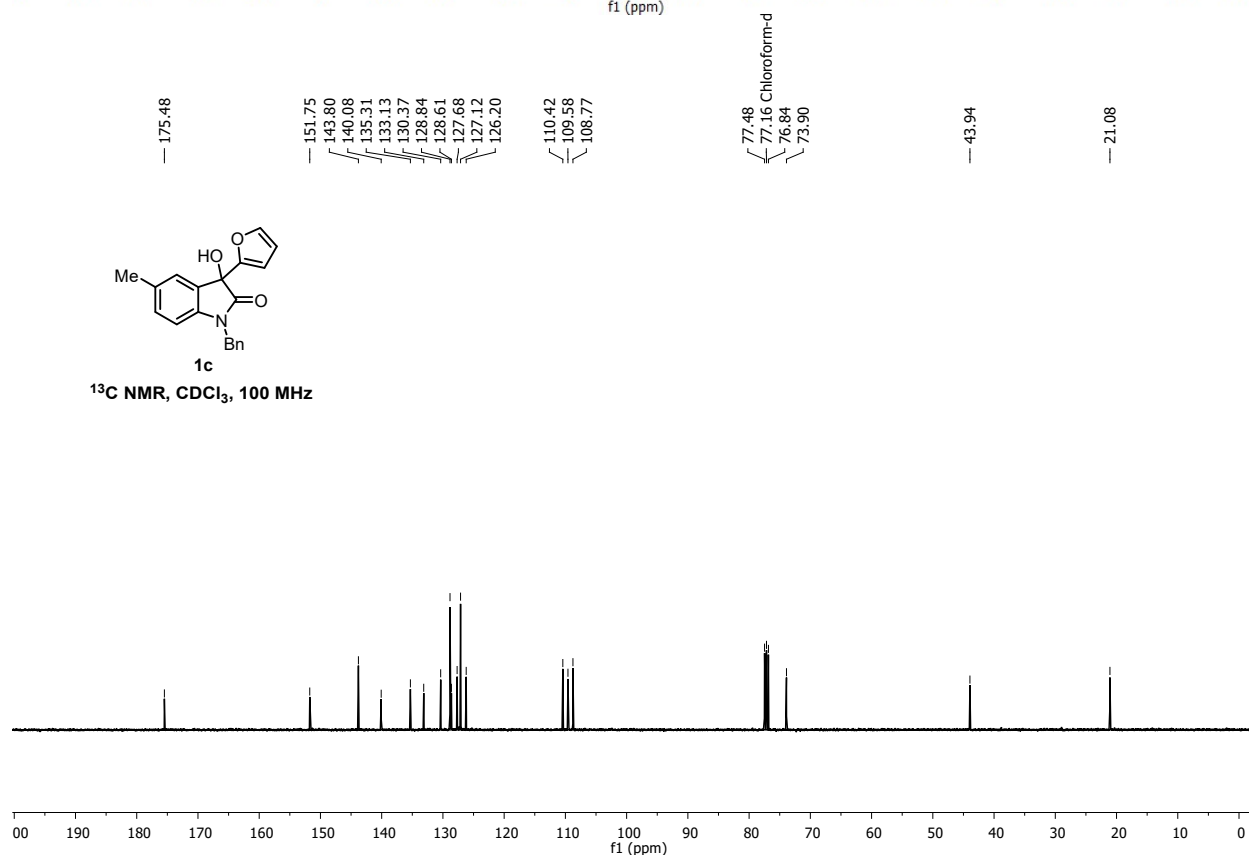

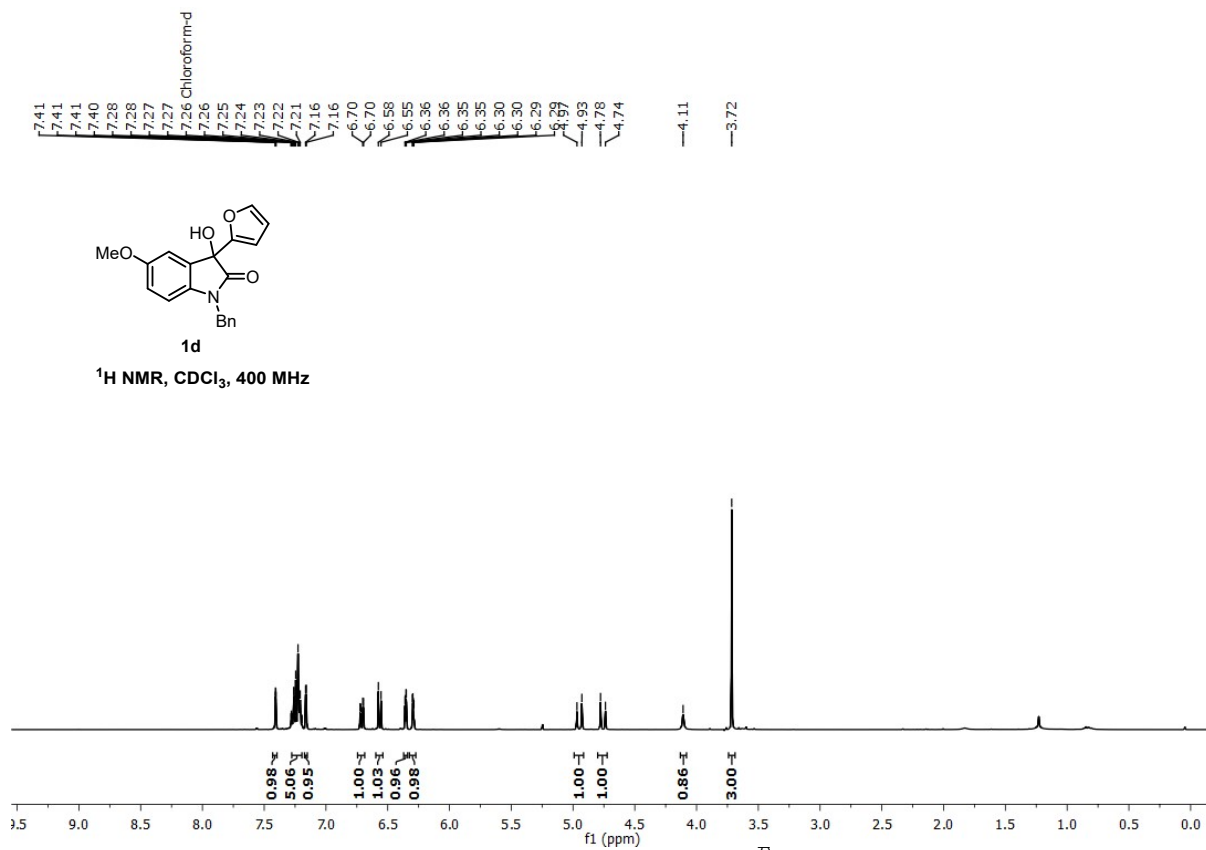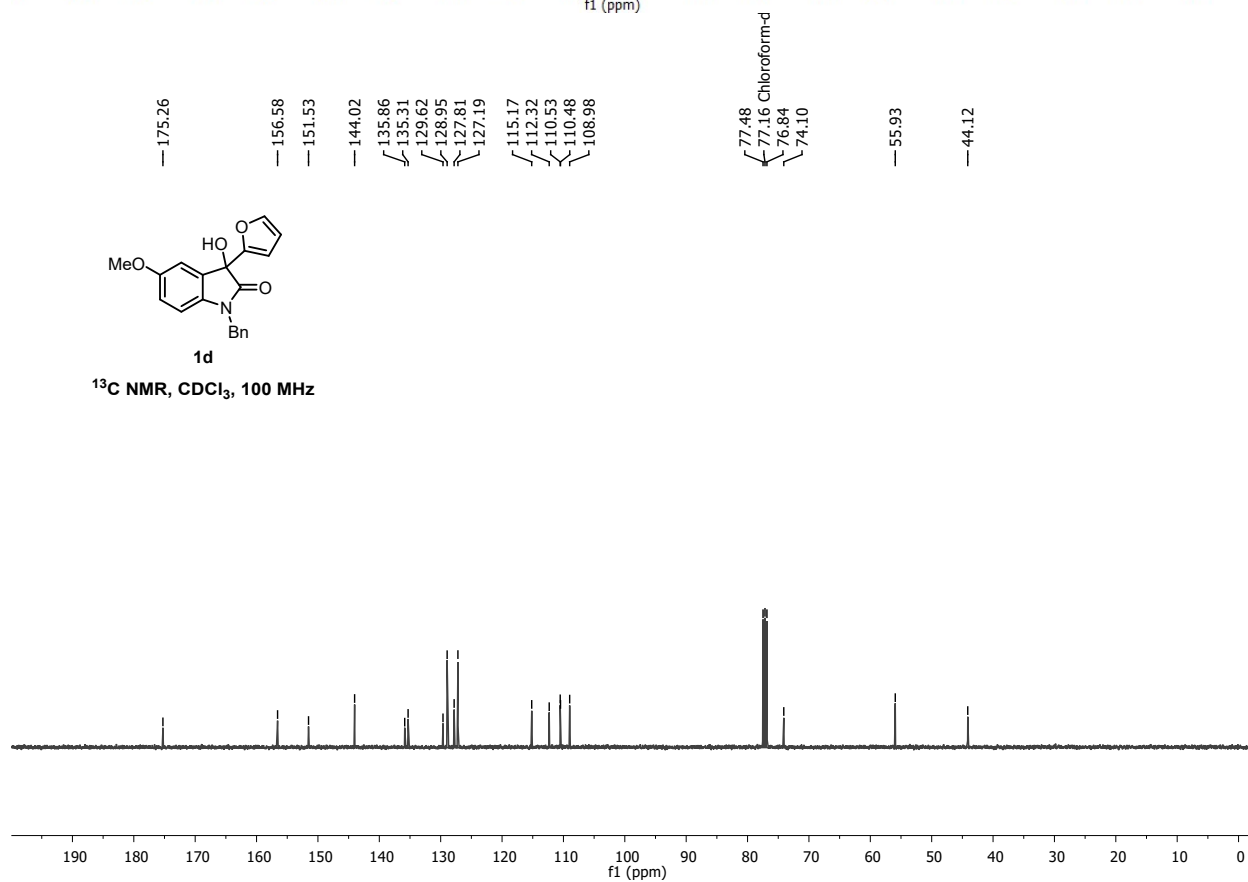

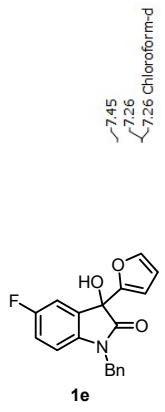

<sup>1</sup>H NMR, CDCl<sub>3</sub>, 400 MHz

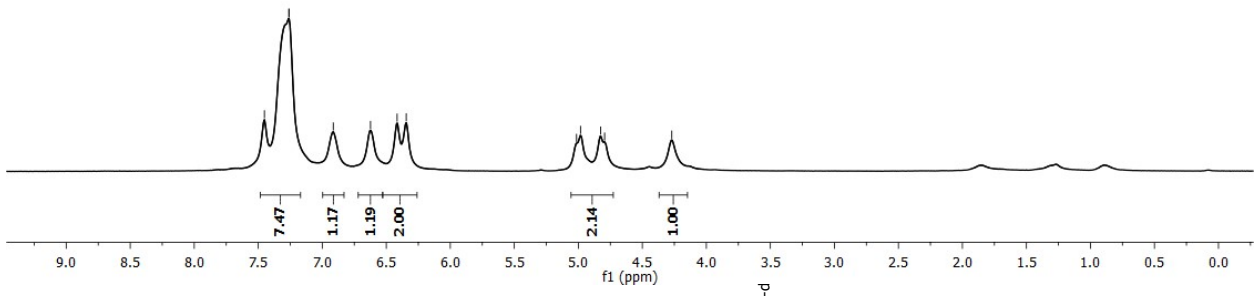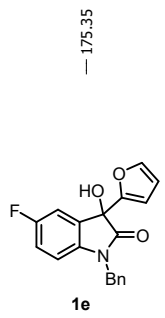

<sup>13</sup>C NMR, CDCl<sub>3</sub>, 100 MHz

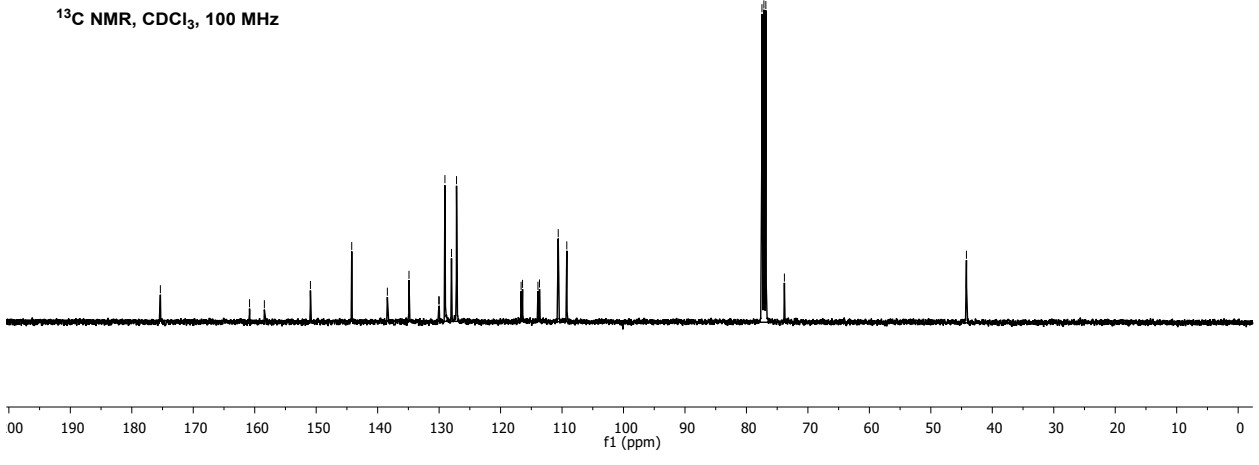



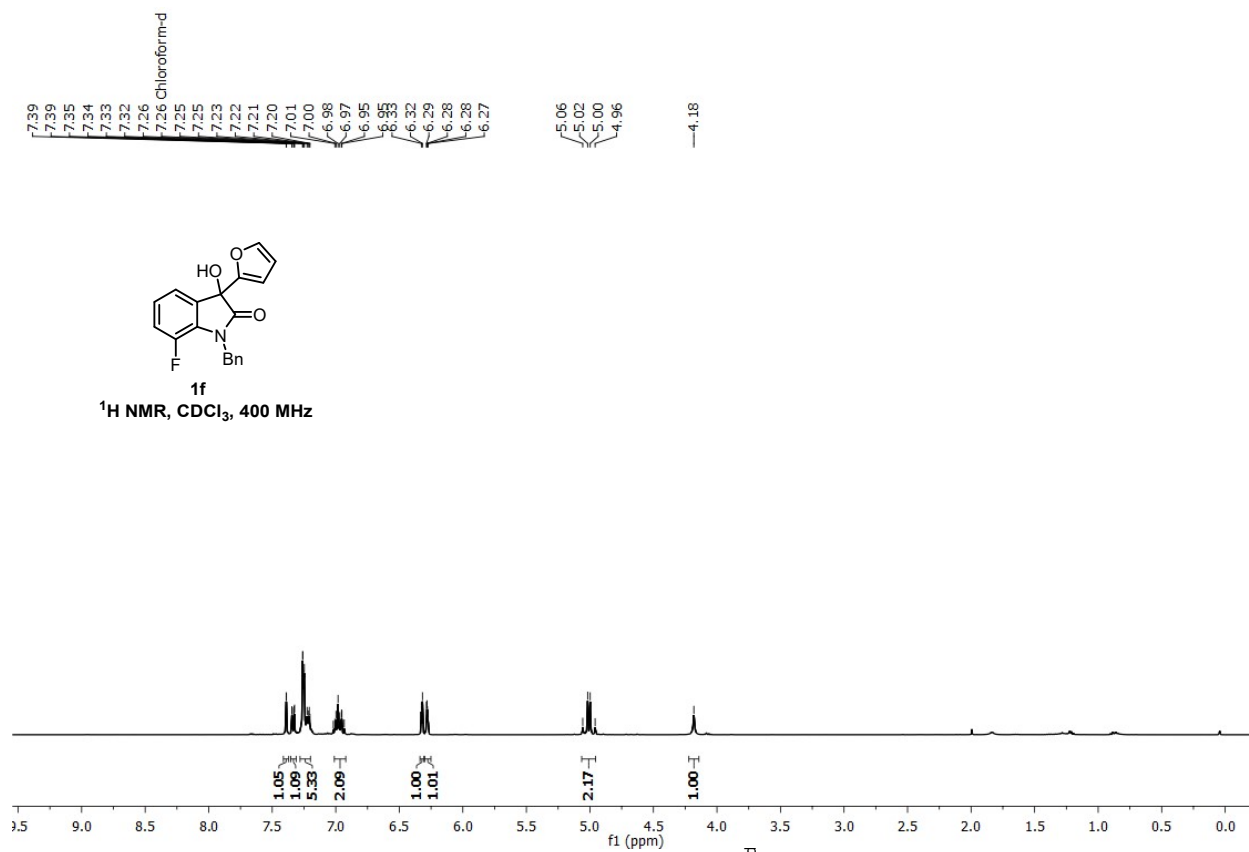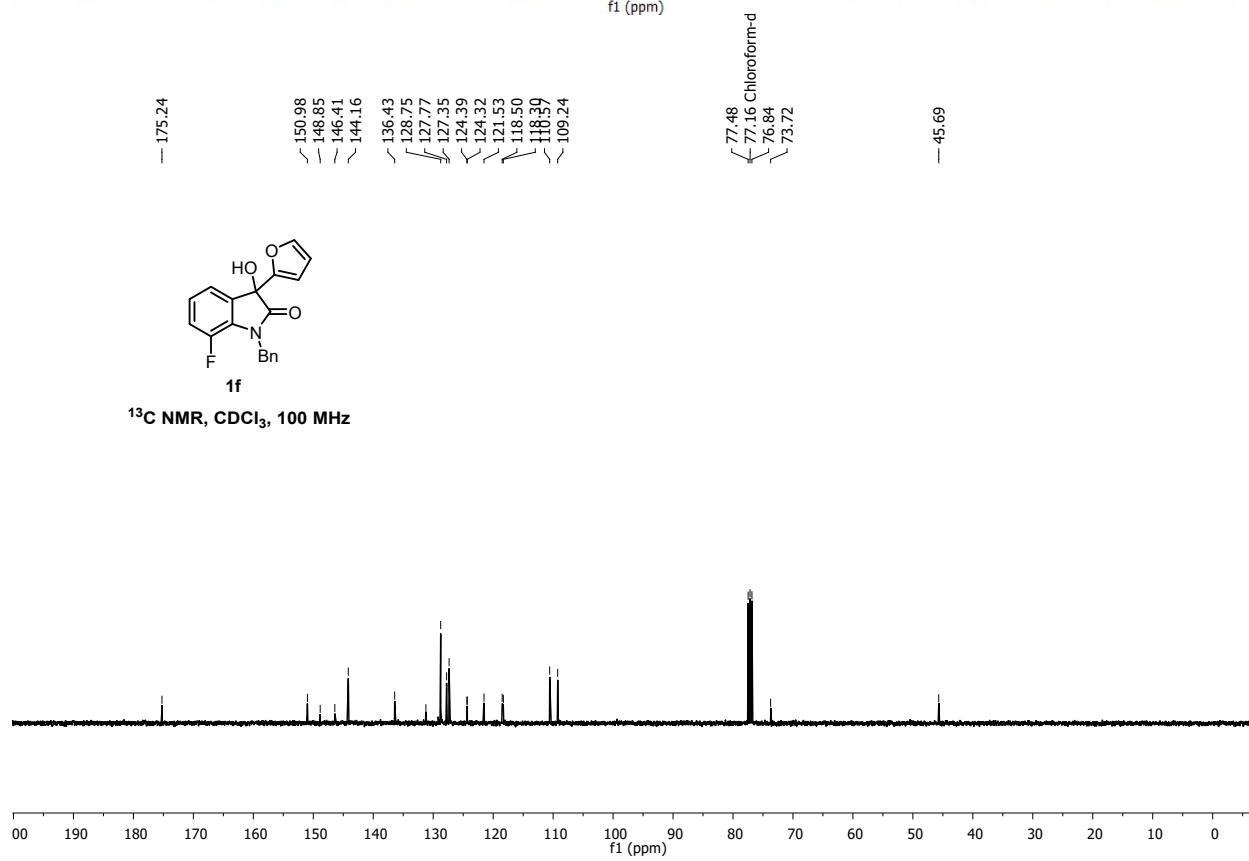

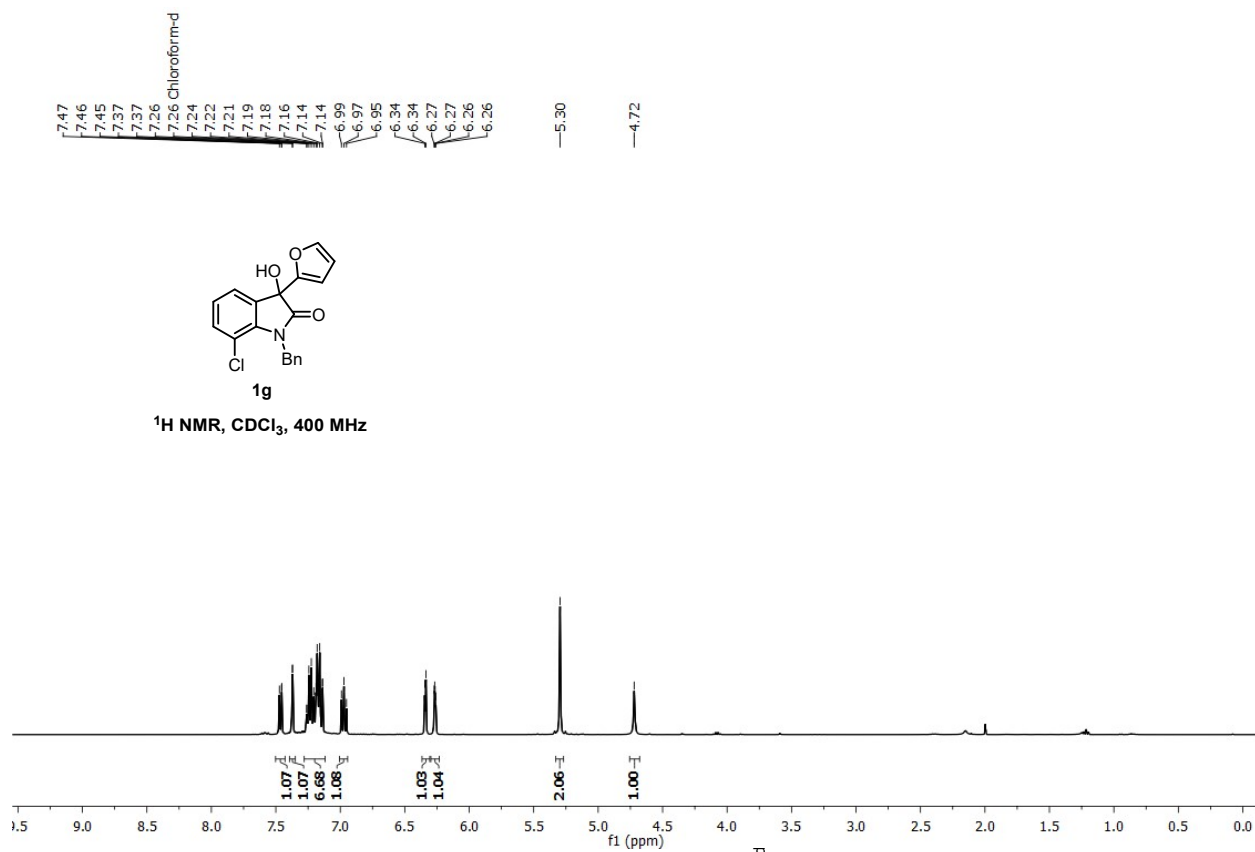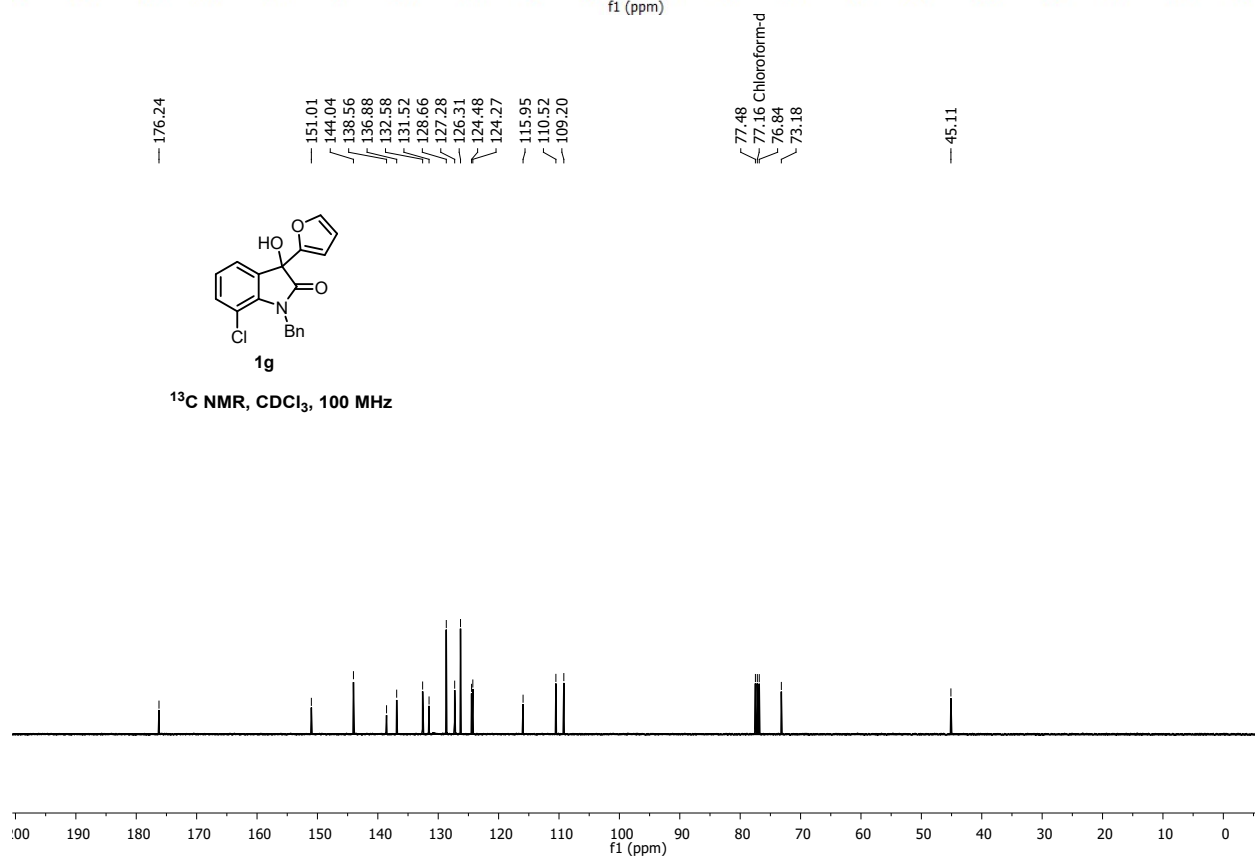

7.58  
7.56  
7.42  
7.39  
7.37  
7.35  
7.26 Chloroform-d  
7.15  
7.13  
7.11  
6.87  
6.85  
6.31

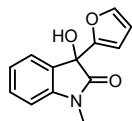

1h

<sup>1</sup>H NMR, CDCl<sub>3</sub>, 400 MHz

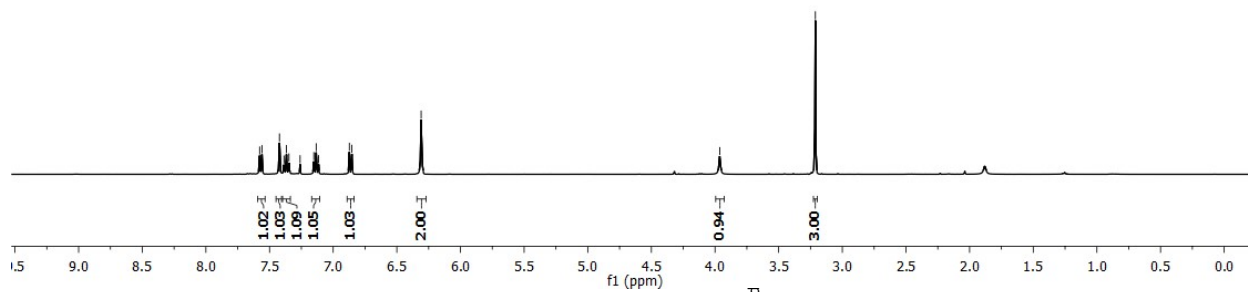

175.26  
151.44  
143.99  
143.60  
130.40  
128.39  
125.52  
123.51  
110.45  
109.05  
108.82  
77.48  
77.16 Chloroform-d  
76.84  
73.58  
26.61

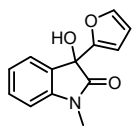

1h

<sup>13</sup>C NMR, CDCl<sub>3</sub>, 100 MHz

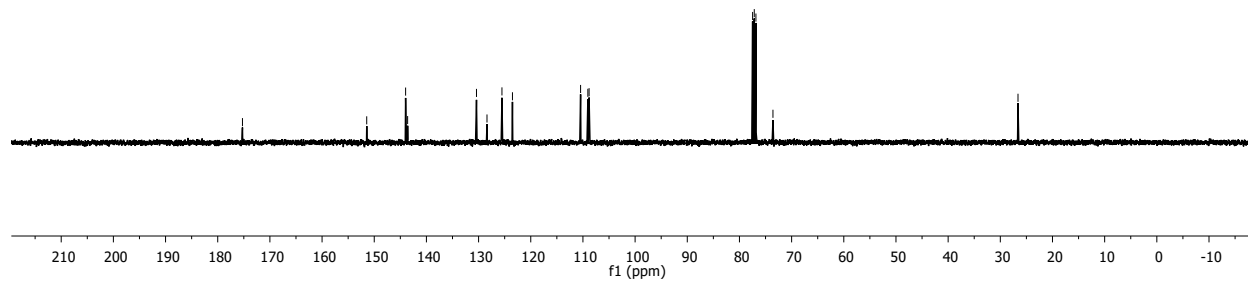

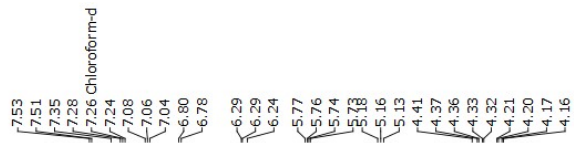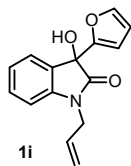

<sup>1</sup>H NMR, CDCl<sub>3</sub>, 400 MHz

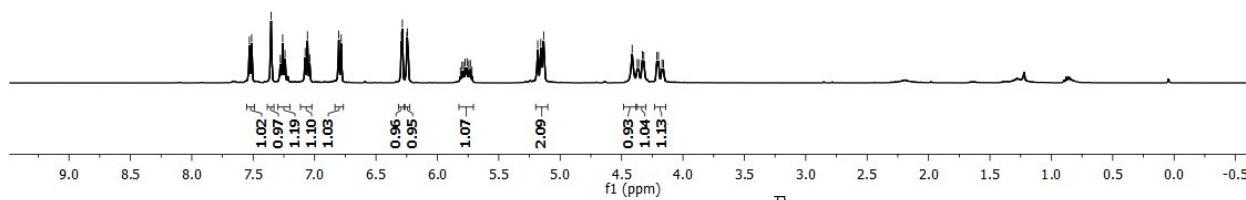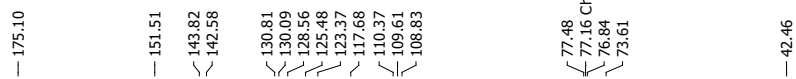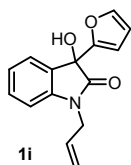

<sup>13</sup>C NMR, CDCl<sub>3</sub>, 100 MHz

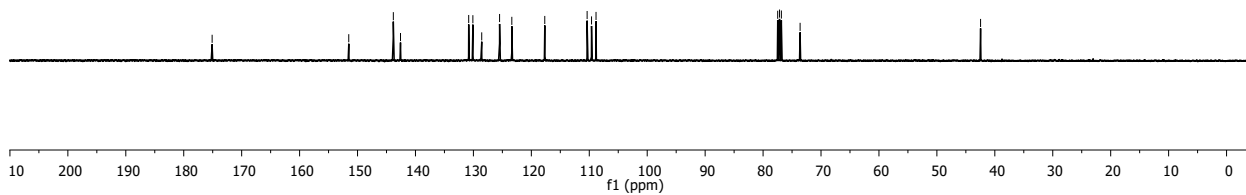



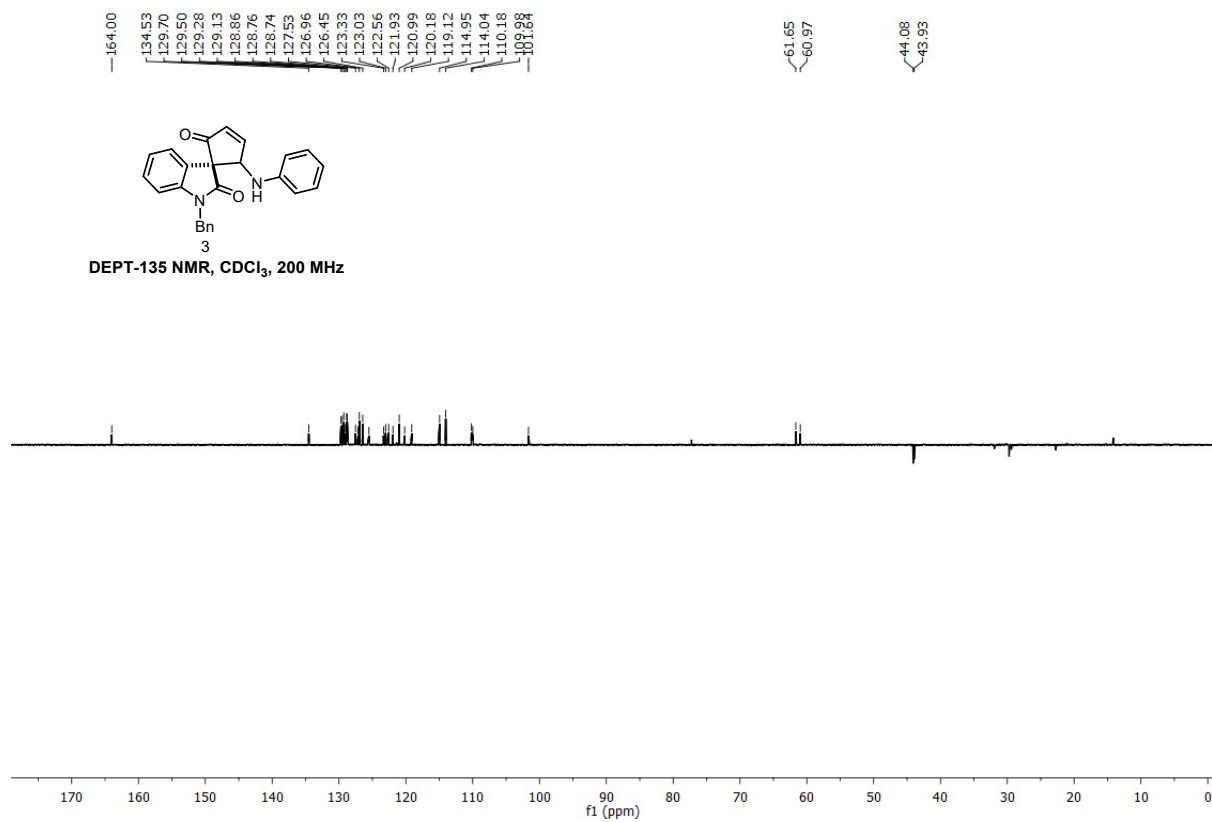

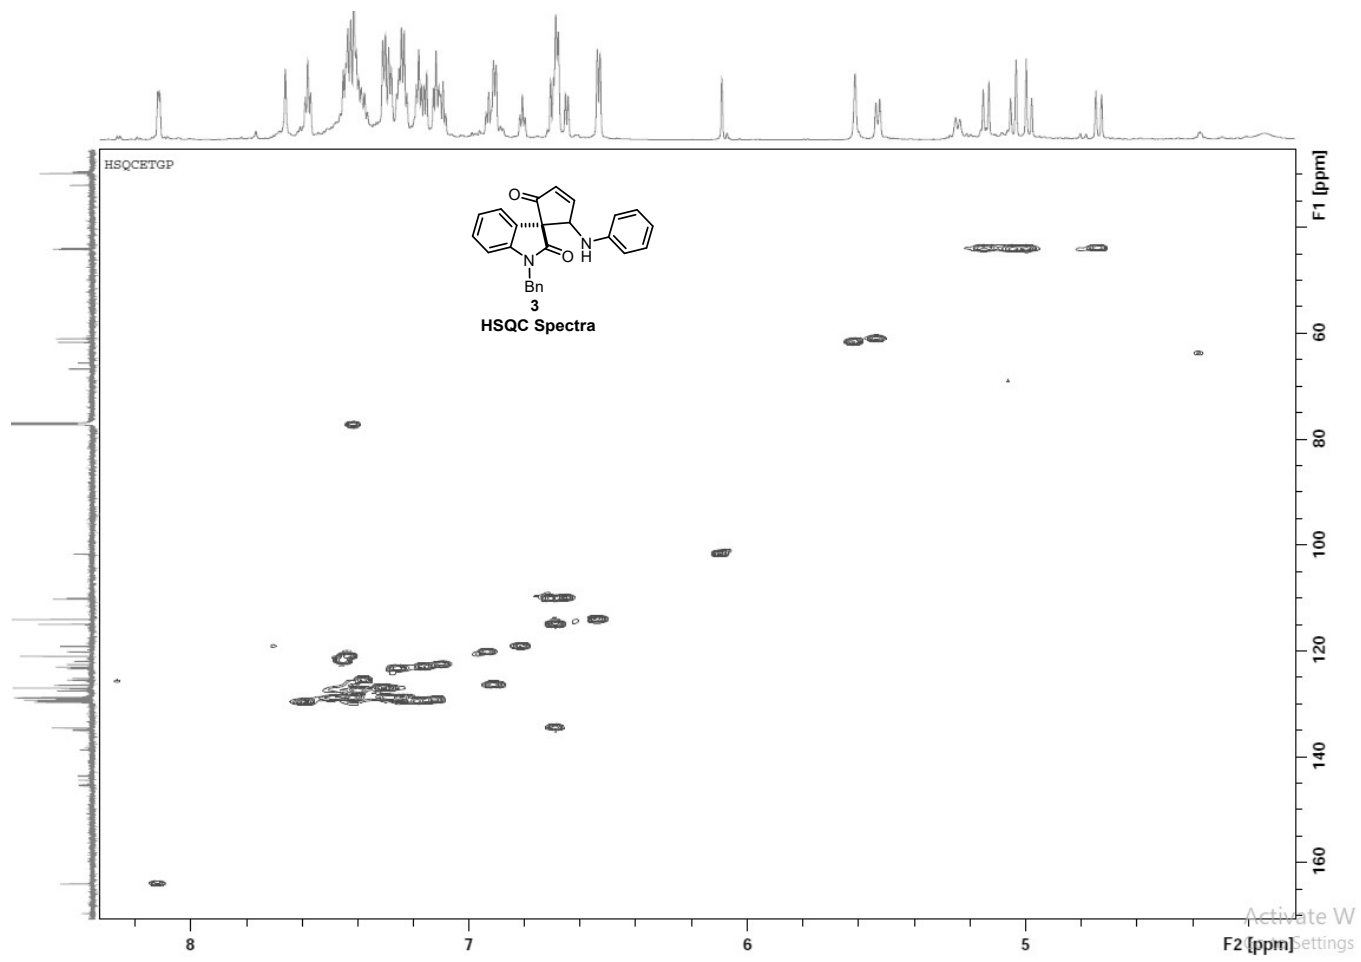

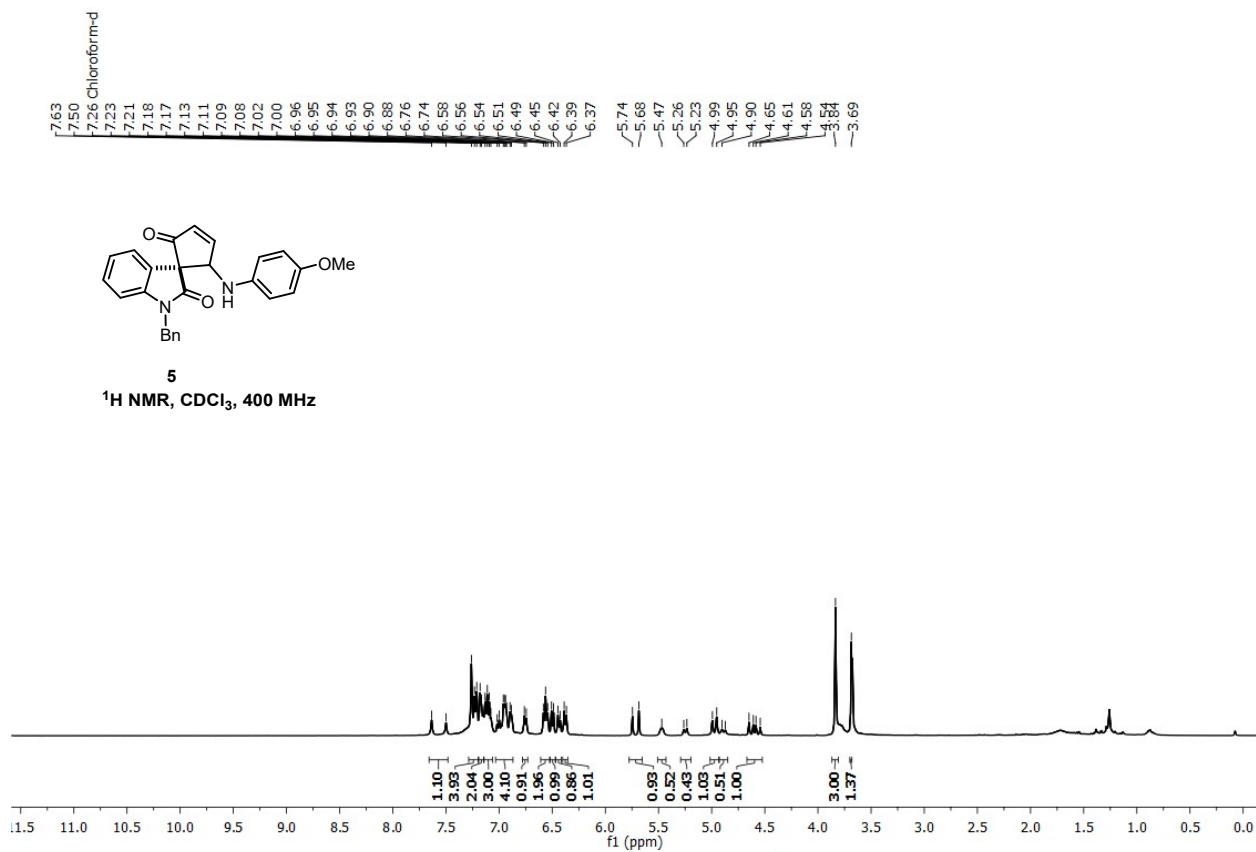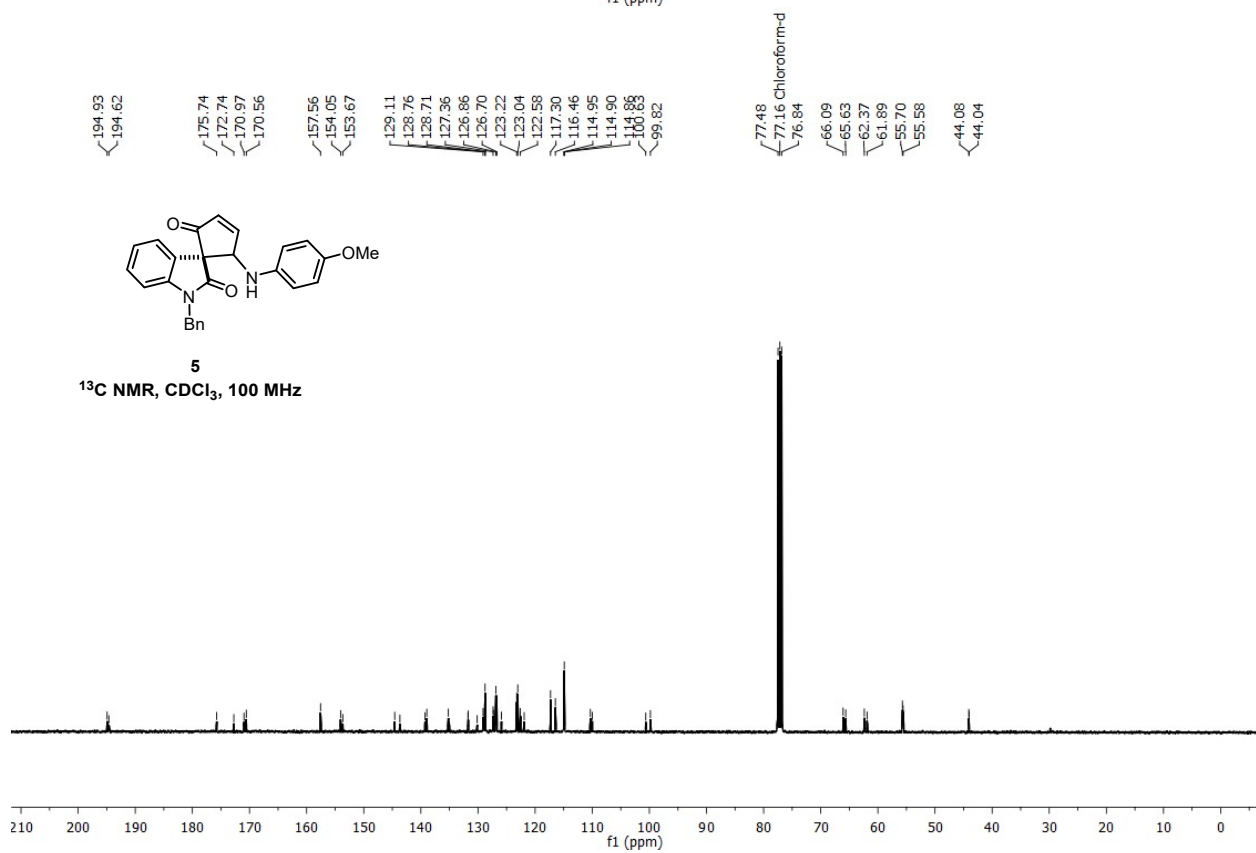



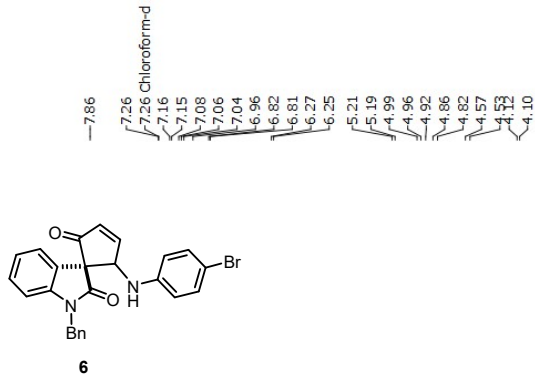

<sup>1</sup>H NMR, CDCl<sub>3</sub>, 400 MHz

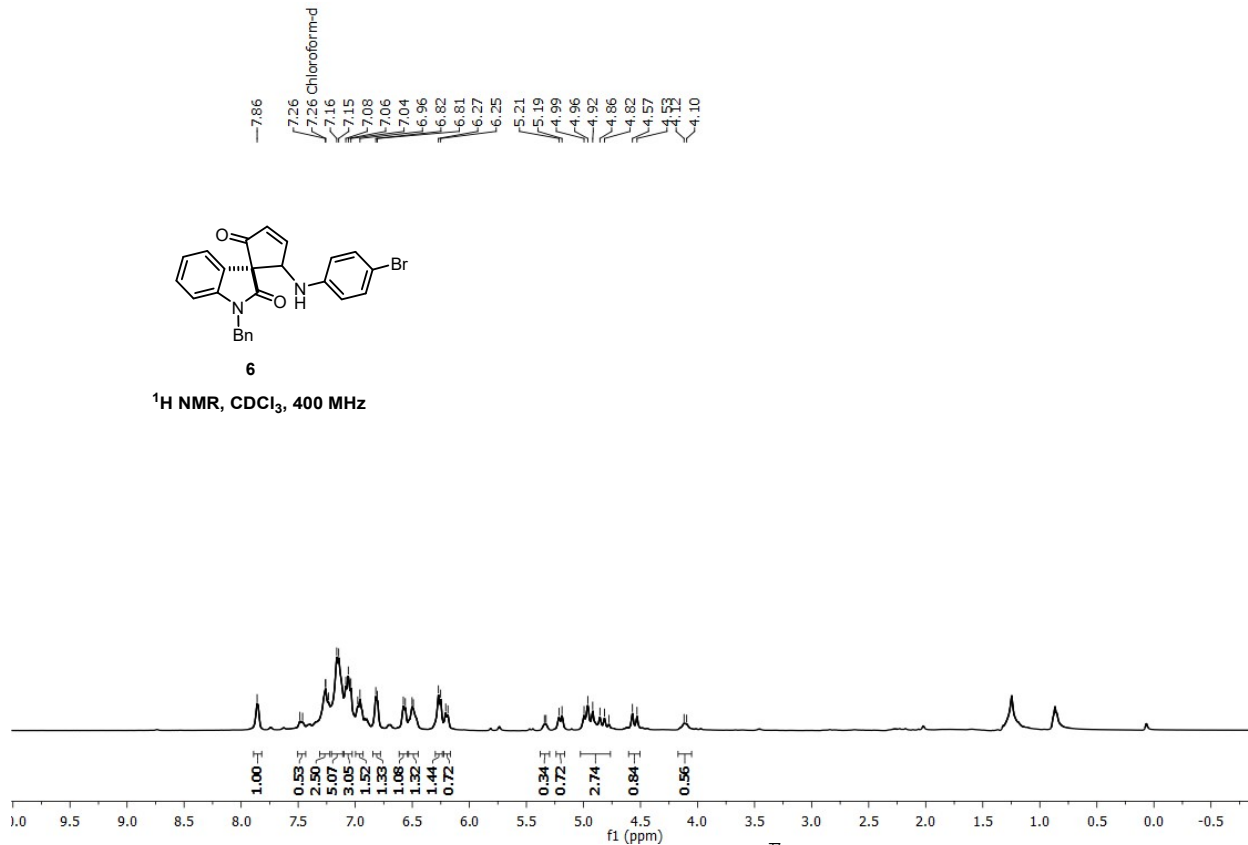

200.29  
 199.99  
 174.29  
 171.37  
 163.63  
 144.81  
 144.49  
 144.38  
 143.65  
 134.71  
 134.65  
 132.18  
 132.07  
 129.27  
 128.97  
 128.88  
 128.80  
 127.60  
 127.13  
 126.61  
 123.56  
 122.04  
 115.76  
 115.54  
 110.88  
 110.23  
 77.48  
 77.16 Chloroform-d  
 76.84  
 66.62  
 66.32  
 62.53  
 61.55  
 44.18  
 44.13

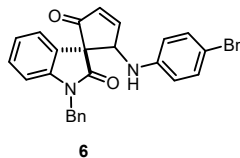

<sup>13</sup>C NMR, CDCl<sub>3</sub>, 100 MHz

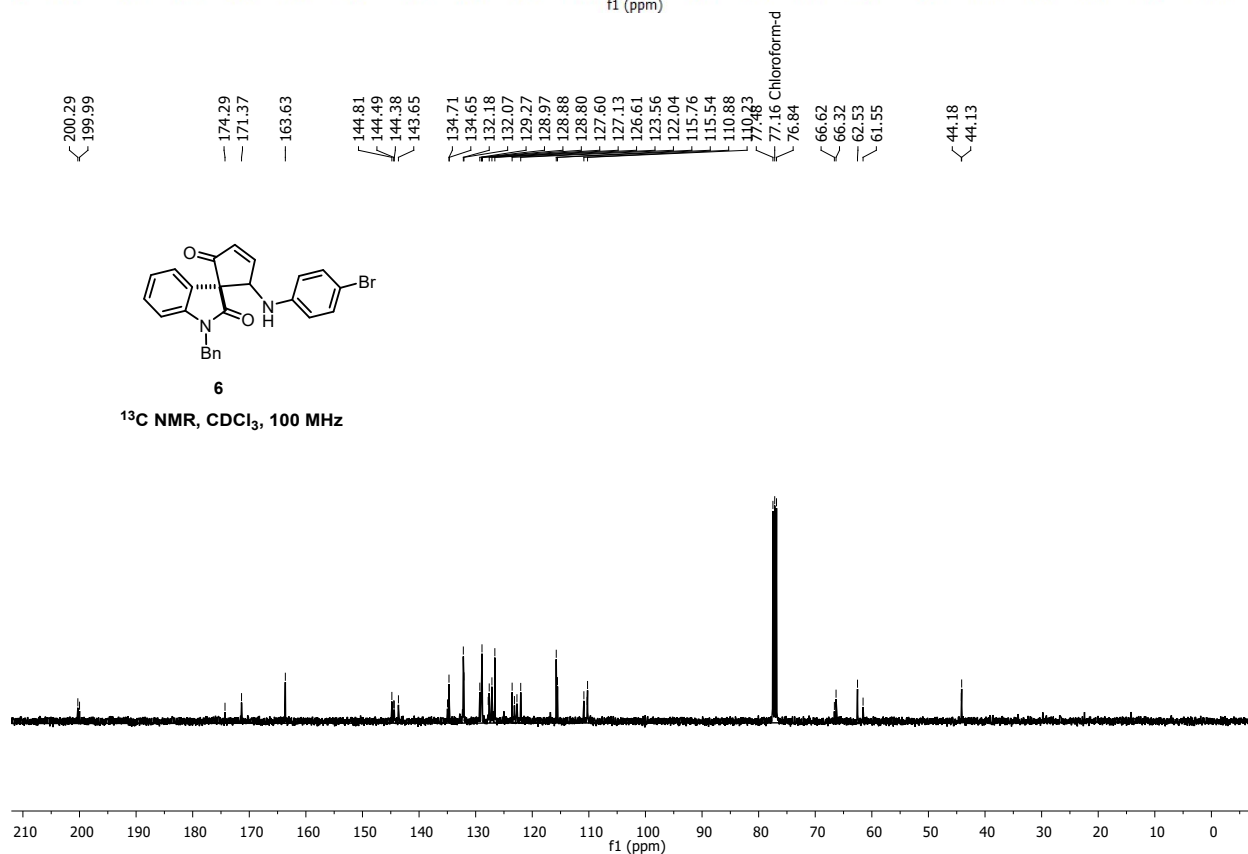

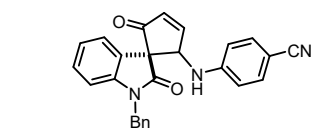

8.27  
8.26  
8.25  
8.25  
8.13  
8.12  
7.53  
7.51  
7.37  
7.36  
7.28  
7.26  
7.14  
7.13  
7.11  
7.08  
7.06  
6.92  
6.88  
5.48  
5.22  
5.20  
4.94  
4.93  
4.90  
4.65  
4.61

7  
<sup>1</sup>H NMR, DMSO-d<sub>6</sub>, 400 MHz

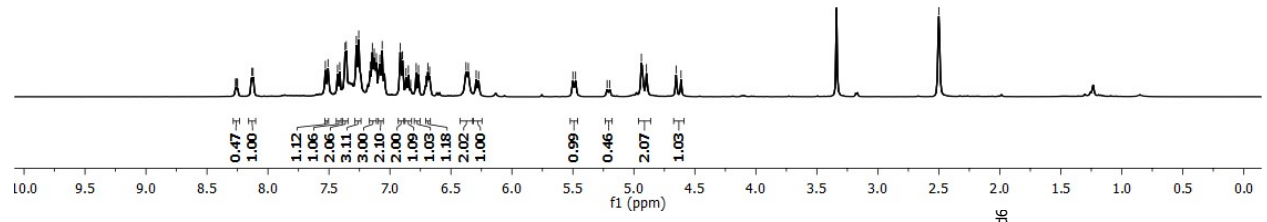

—2,50 Dimethyl Sulfoxide-d6

201.09  
200.89  
173.75  
170.35  
165.89  
165.53  
150.54  
150.24  
143.78  
143.32  
135.47  
133.41  
133.27  
128.62  
128.40  
128.28  
127.51  
126.56  
123.00  
122.96  
109.42  
97.09

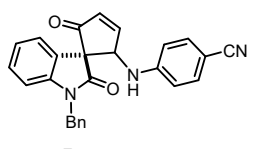

7  
<sup>13</sup>C NMR, DMSO-d<sub>6</sub>, 100 MHz

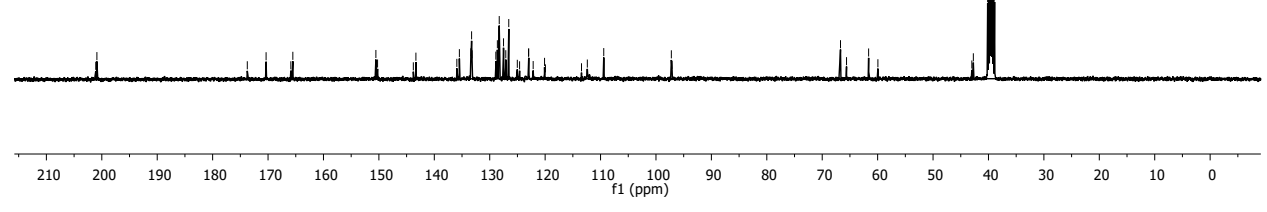

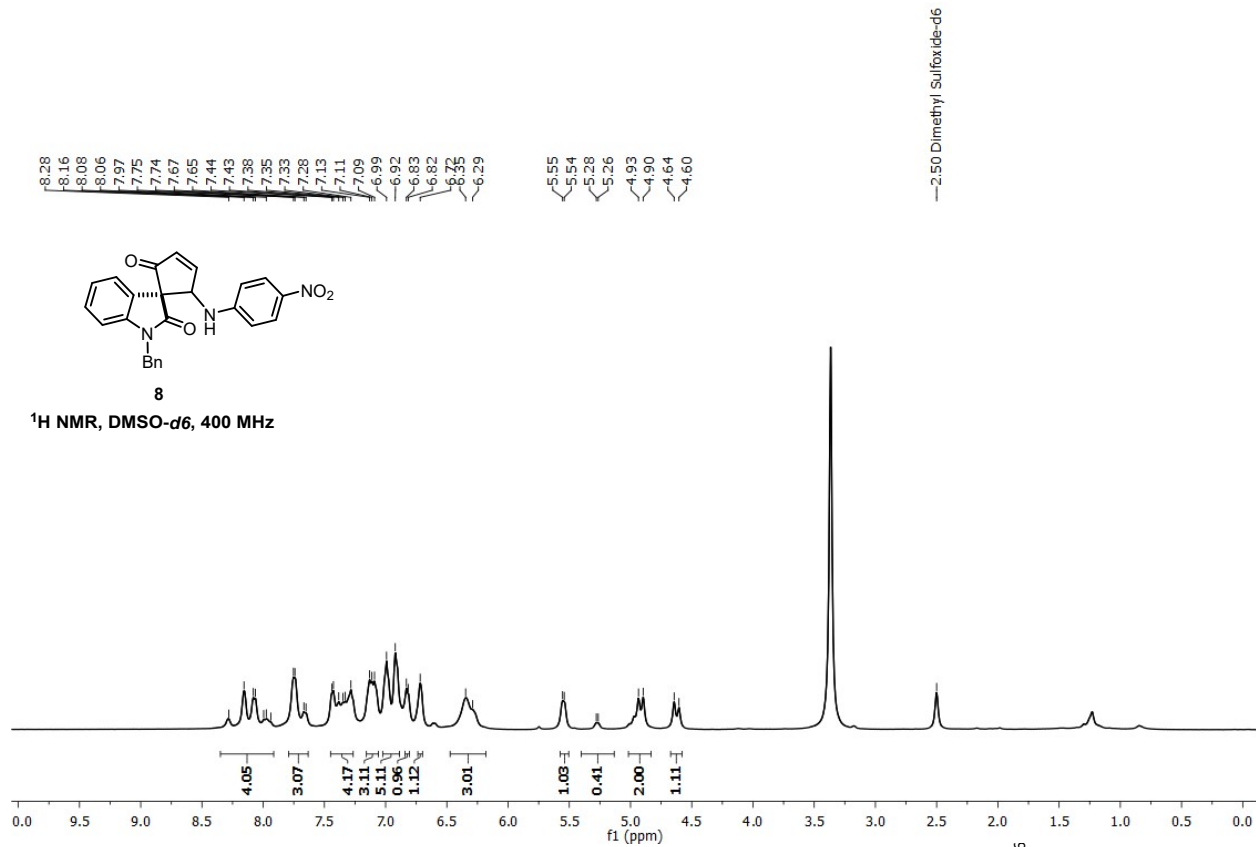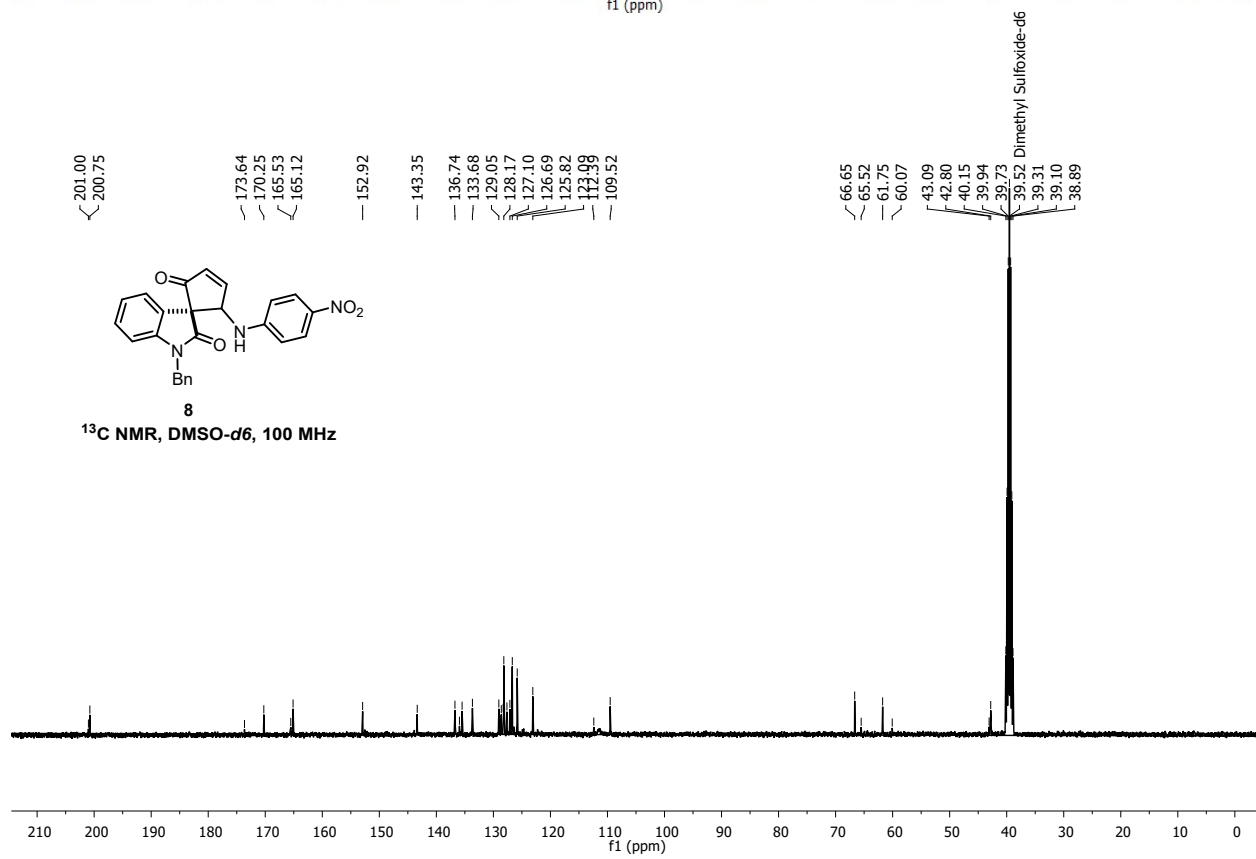

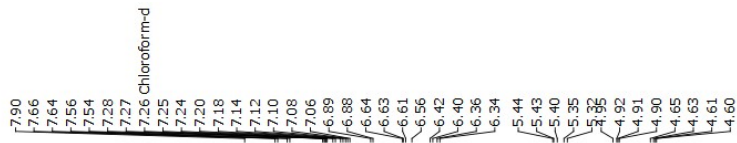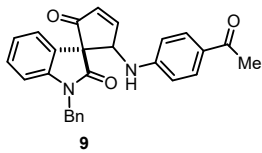

<sup>1</sup>H NMR, CDCl<sub>3</sub>, 400 MHz

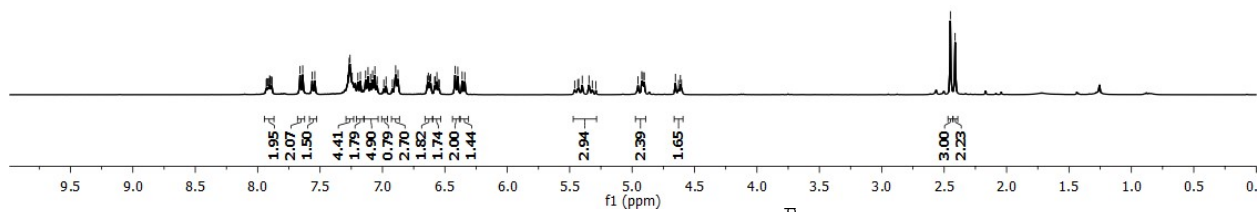

2.45  
2.41

199.96  
199.88  
196.49  
196.47

174.10  
171.34  
162.94  
162.92

149.97  
149.70  
144.33  
143.71

130.80  
130.67  
128.95  
128.80  
127.33  
126.67  
126.66  
112.84  
112.38  
110.26

77.48  
77.16 Chloroform-d  
76.84

66.47  
66.38  
61.83  
60.62

44.25  
44.12

26.19  
26.16

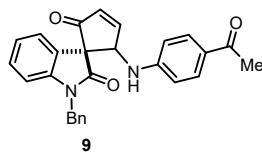

<sup>13</sup>C NMR, CDCl<sub>3</sub>, 100 MHz

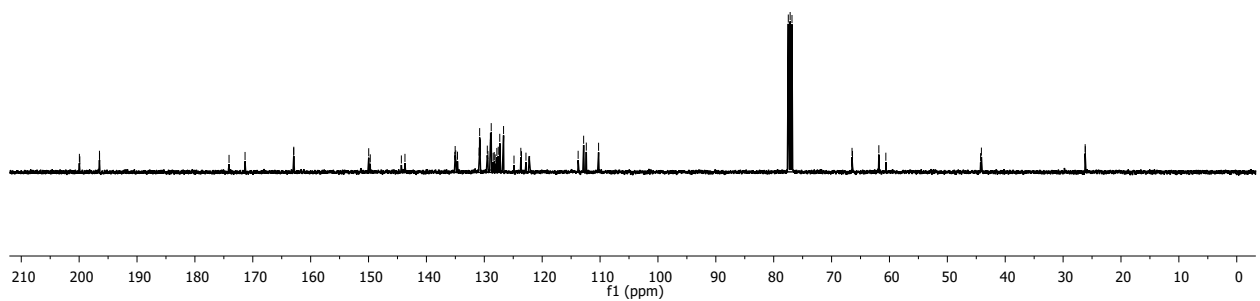

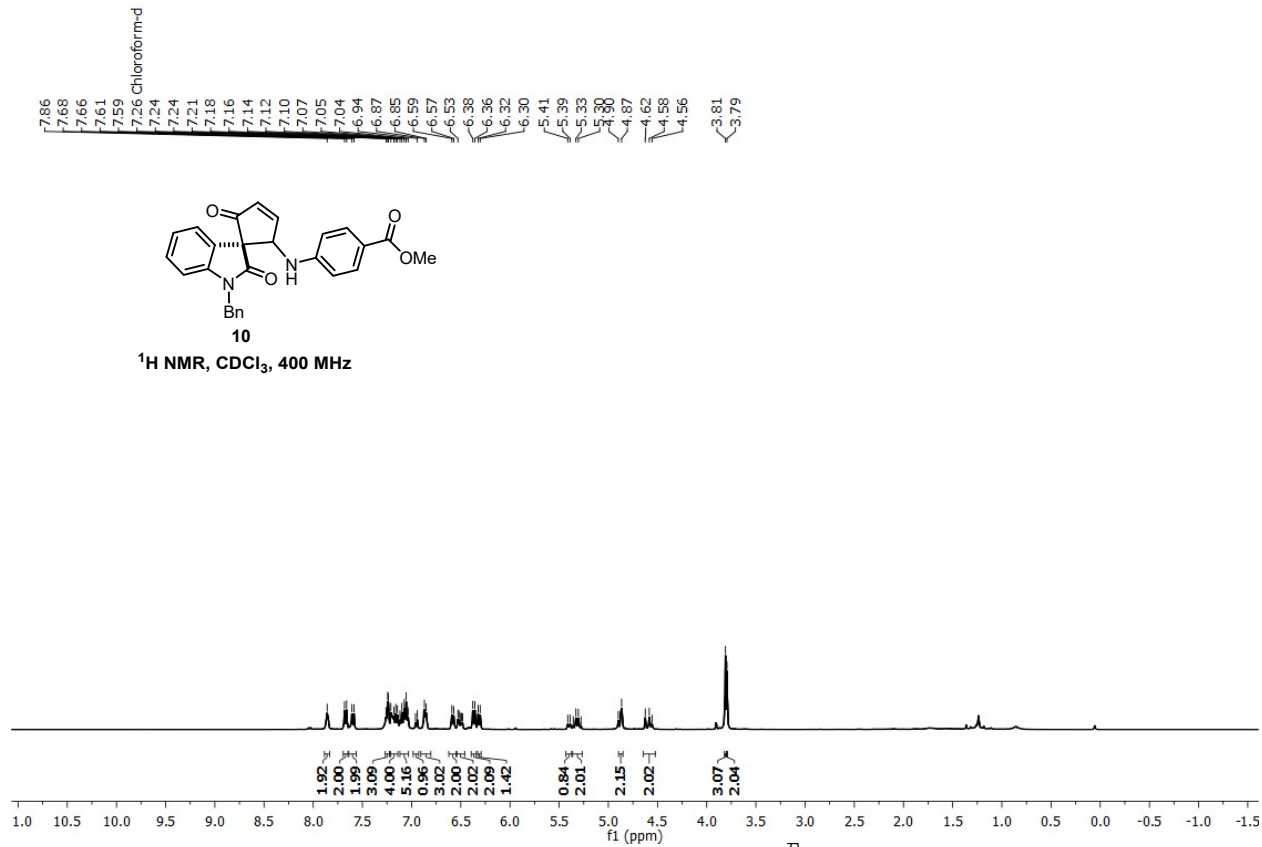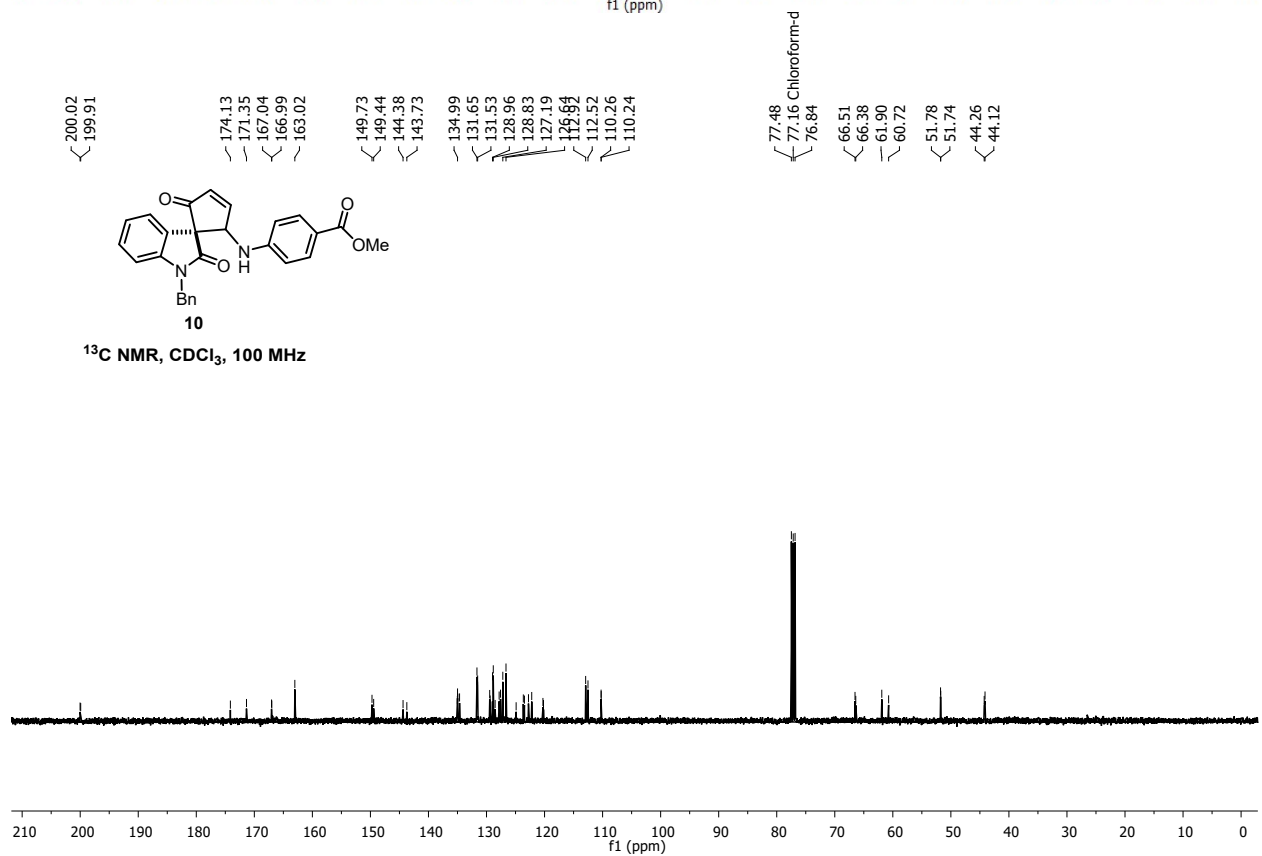

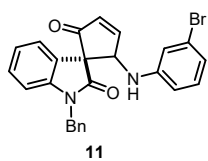

<sup>1</sup>H NMR, CDCl<sub>3</sub>, 400 MHz

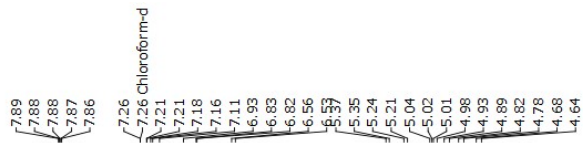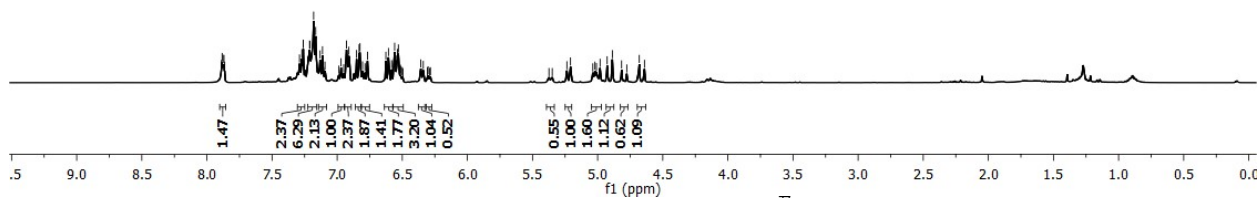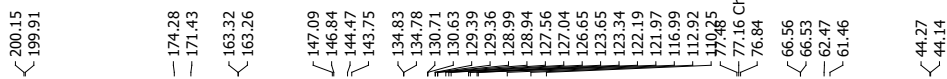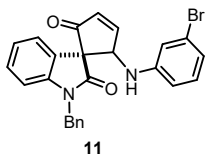

<sup>13</sup>C NMR, CDCl<sub>3</sub>, 100 MHz

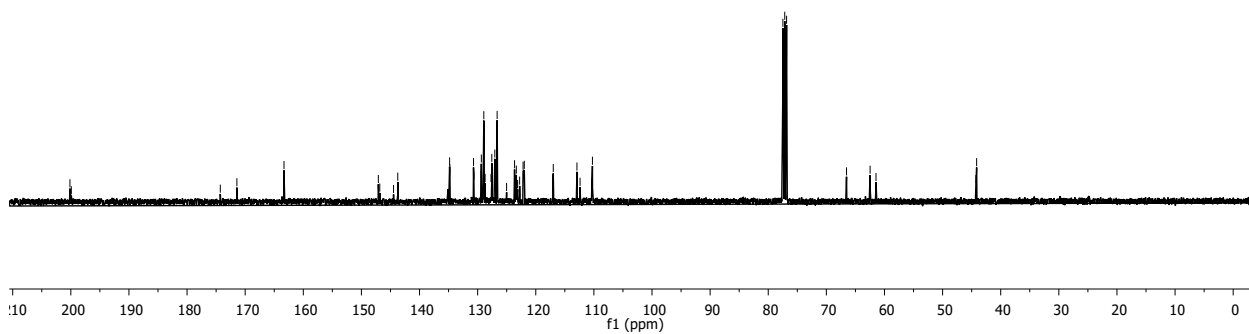

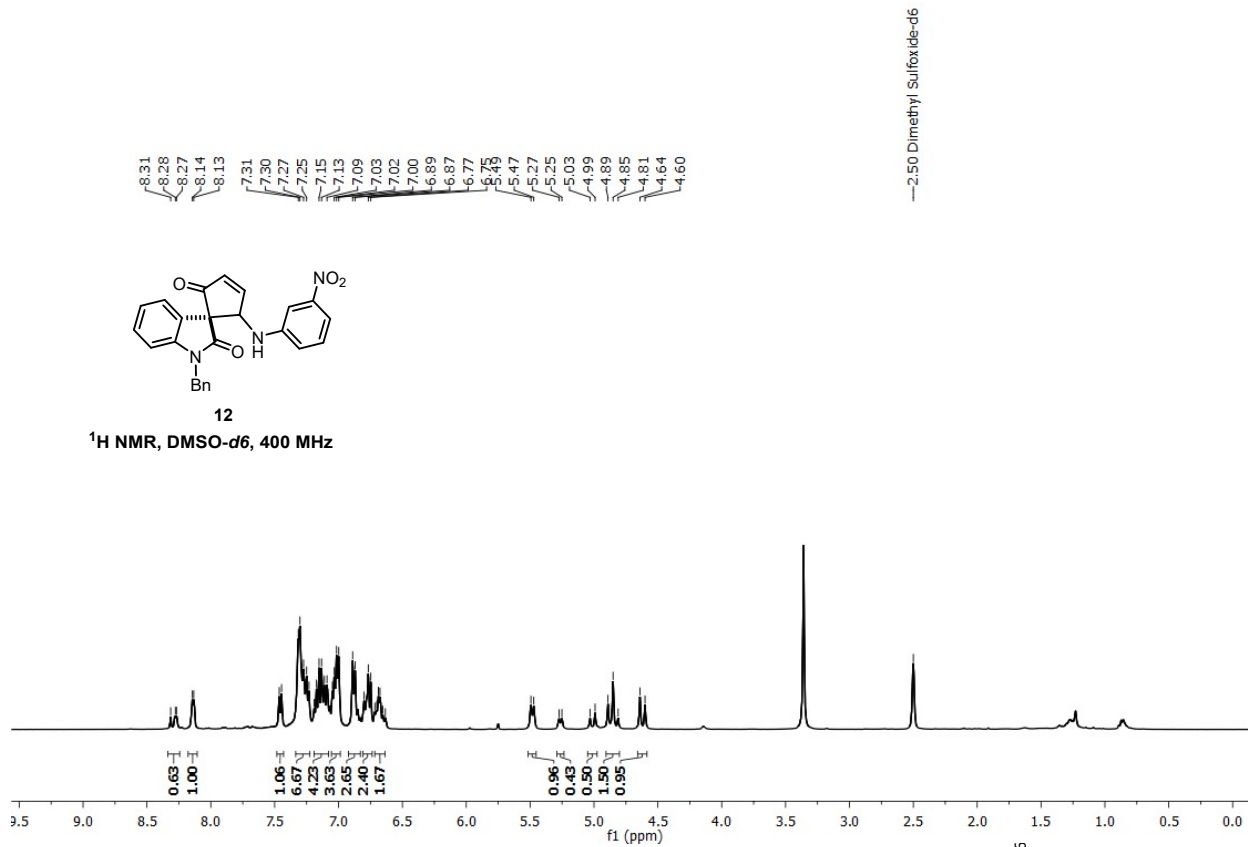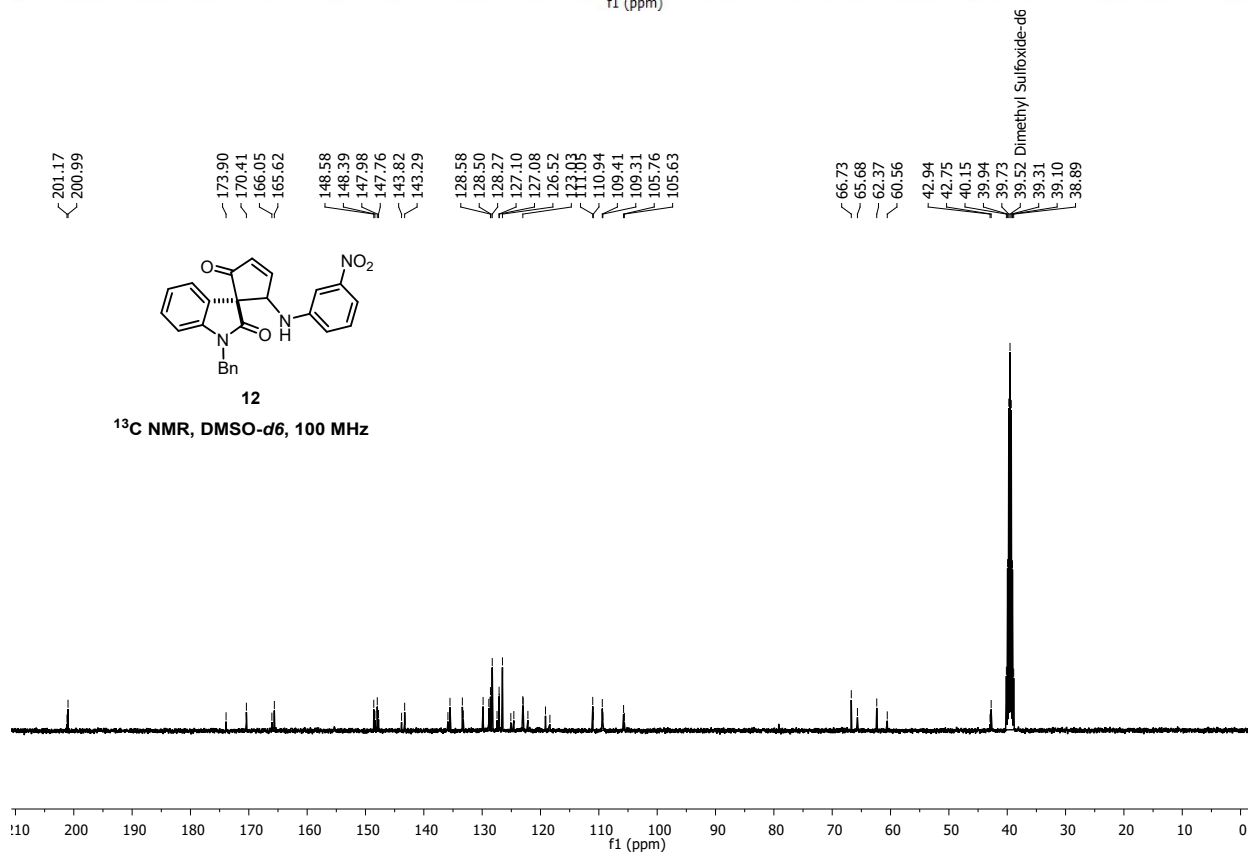

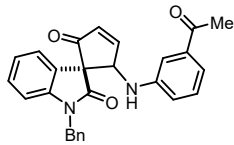

13

<sup>1</sup>H NMR, CDCl<sub>3</sub>, 400 MHz

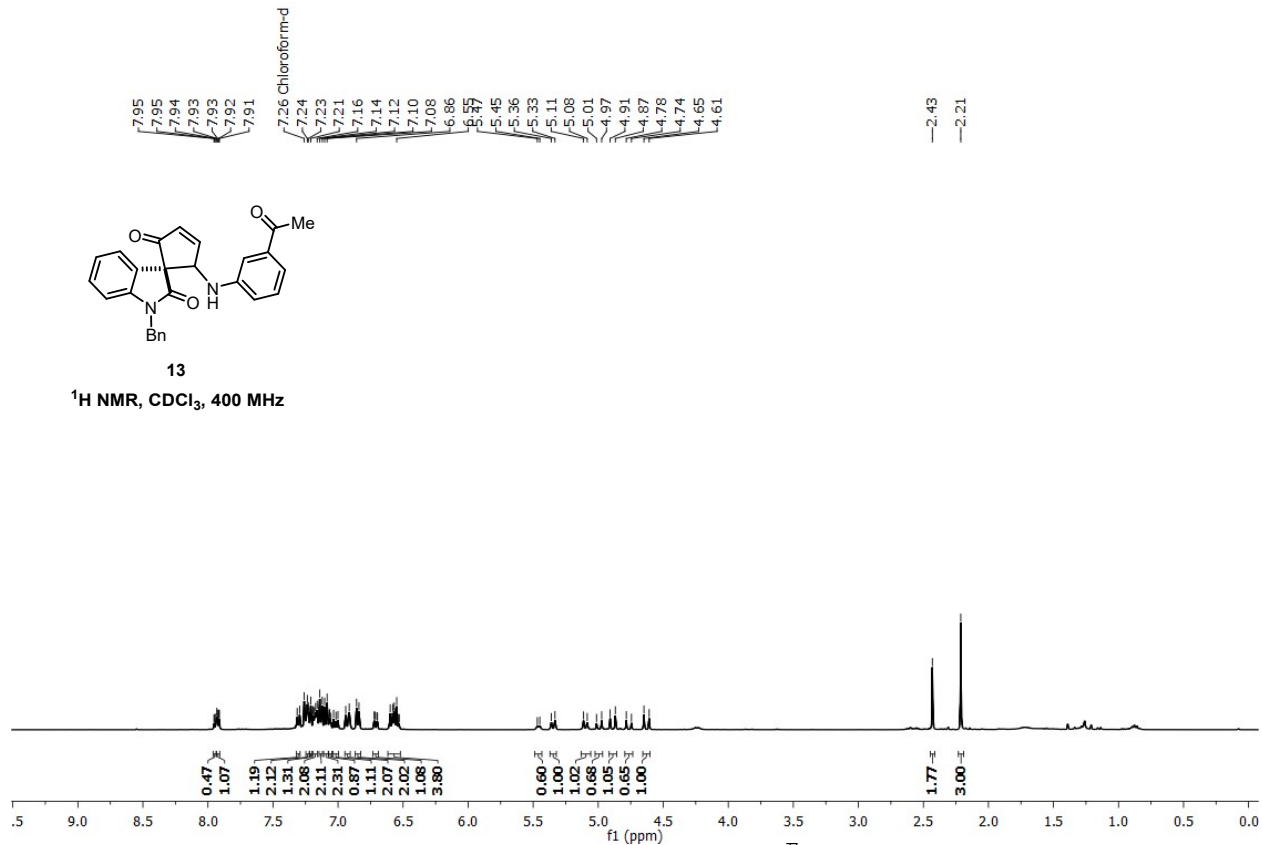

200.16, 199.88, 198.11, 198.06

174.25, 171.43, 163.49, 163.41

146.01, 138.32, 134.81, 134.75, 129.68, 129.59, 129.34, 129.32, 128.96, 128.88, 127.71, 127.57, 127.02, 126.68, 123.70, 122.25, 119.63, 119.25, 119.23, 118.18, 113.67, 112.72, 110.25, 77.48, 77.16 Chloroform-d, 76.84

66.64, 66.39, 62.46, 61.58

44.18, 44.12

26.71, 26.45

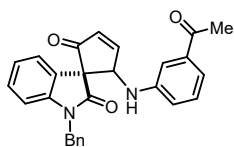

13

<sup>13</sup>C NMR, CDCl<sub>3</sub>, 100 MHz

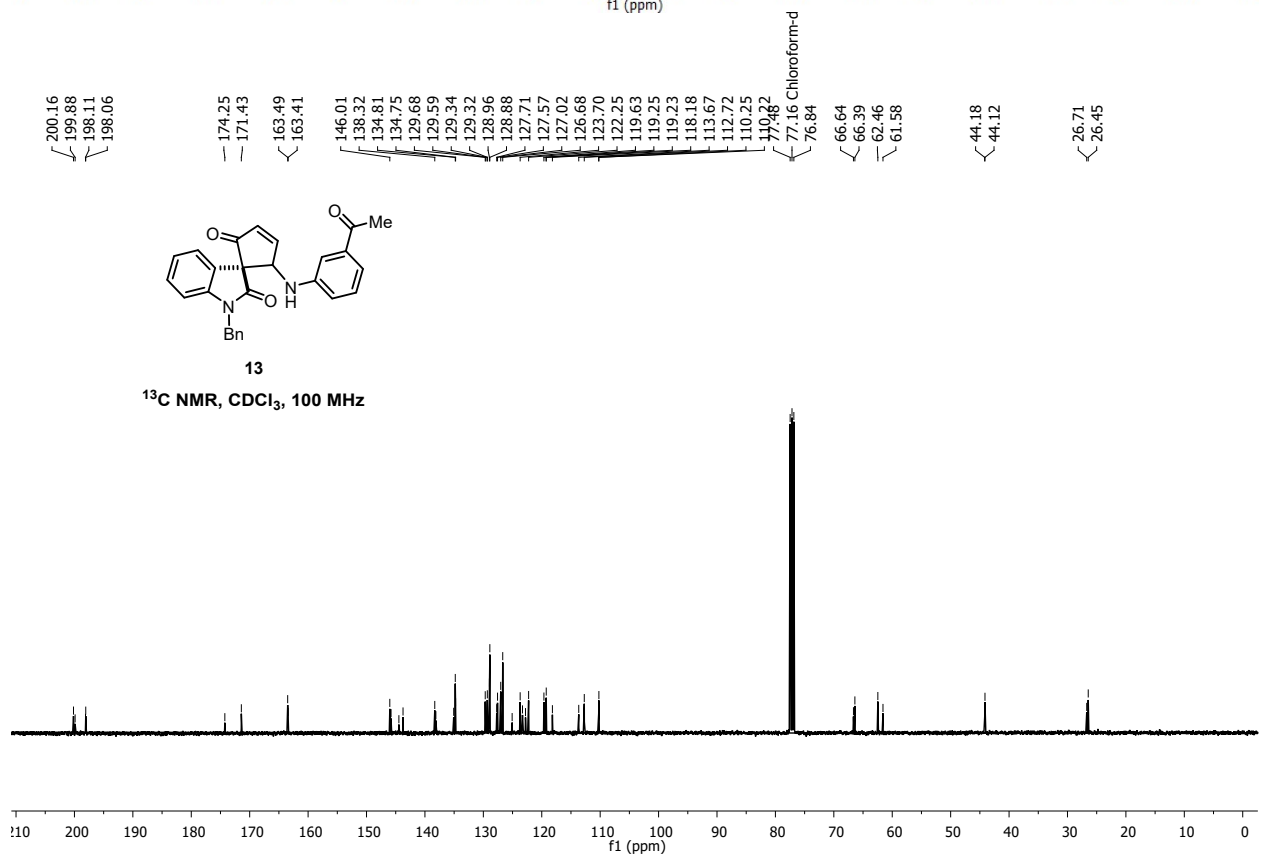



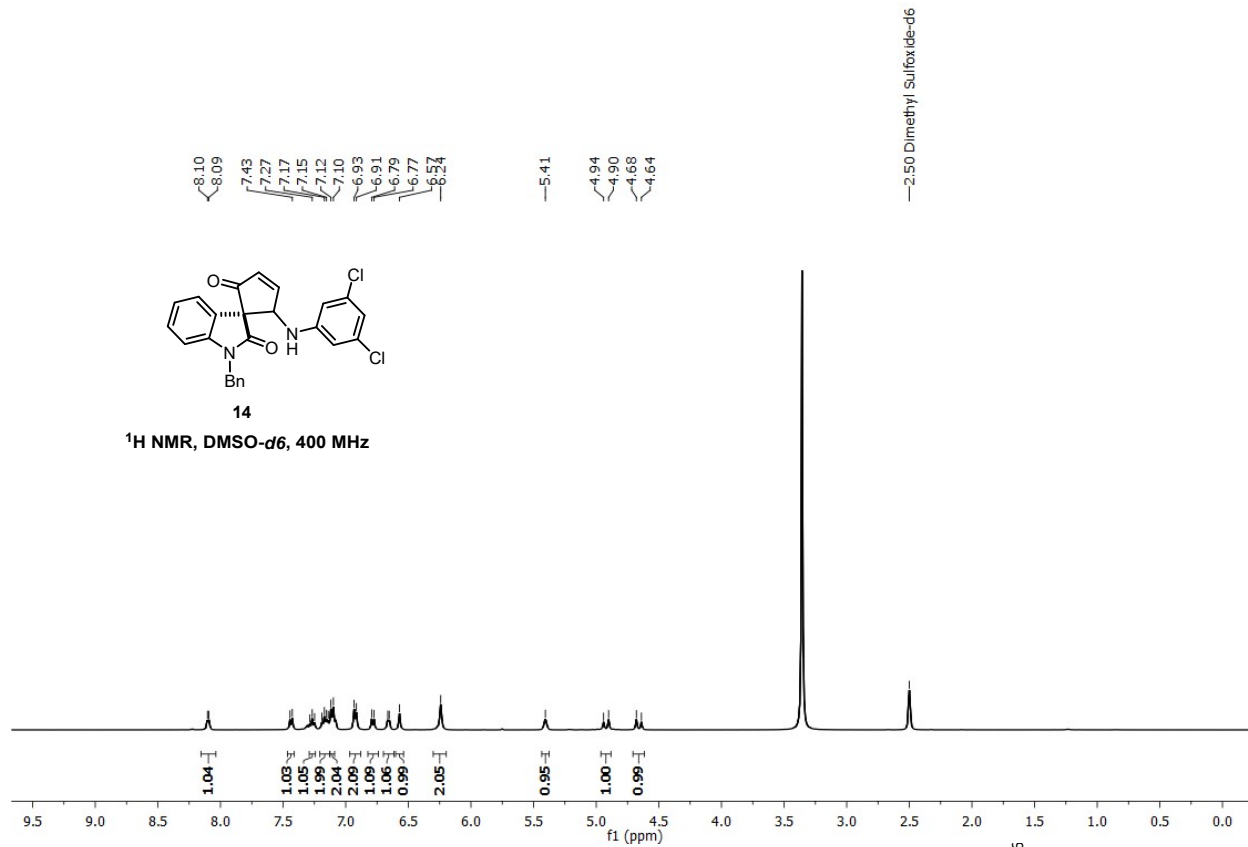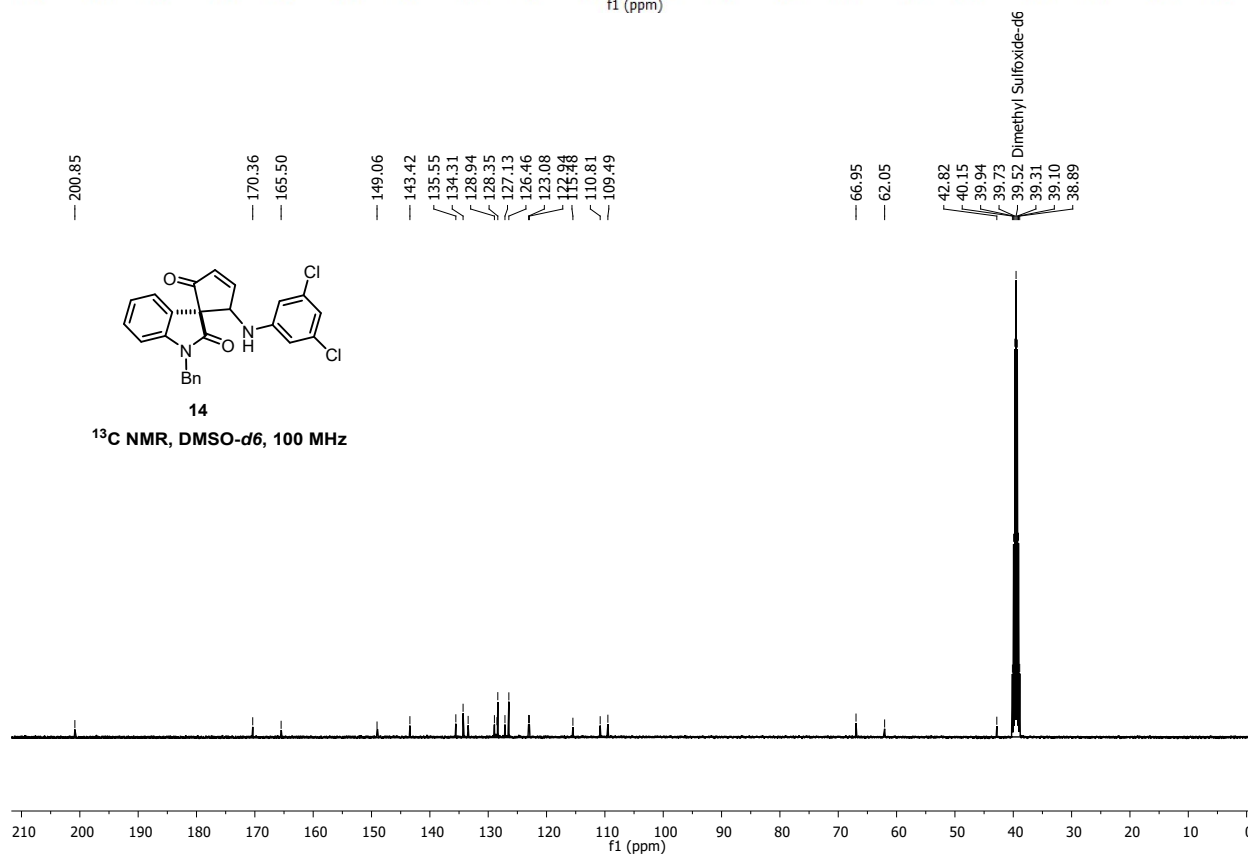

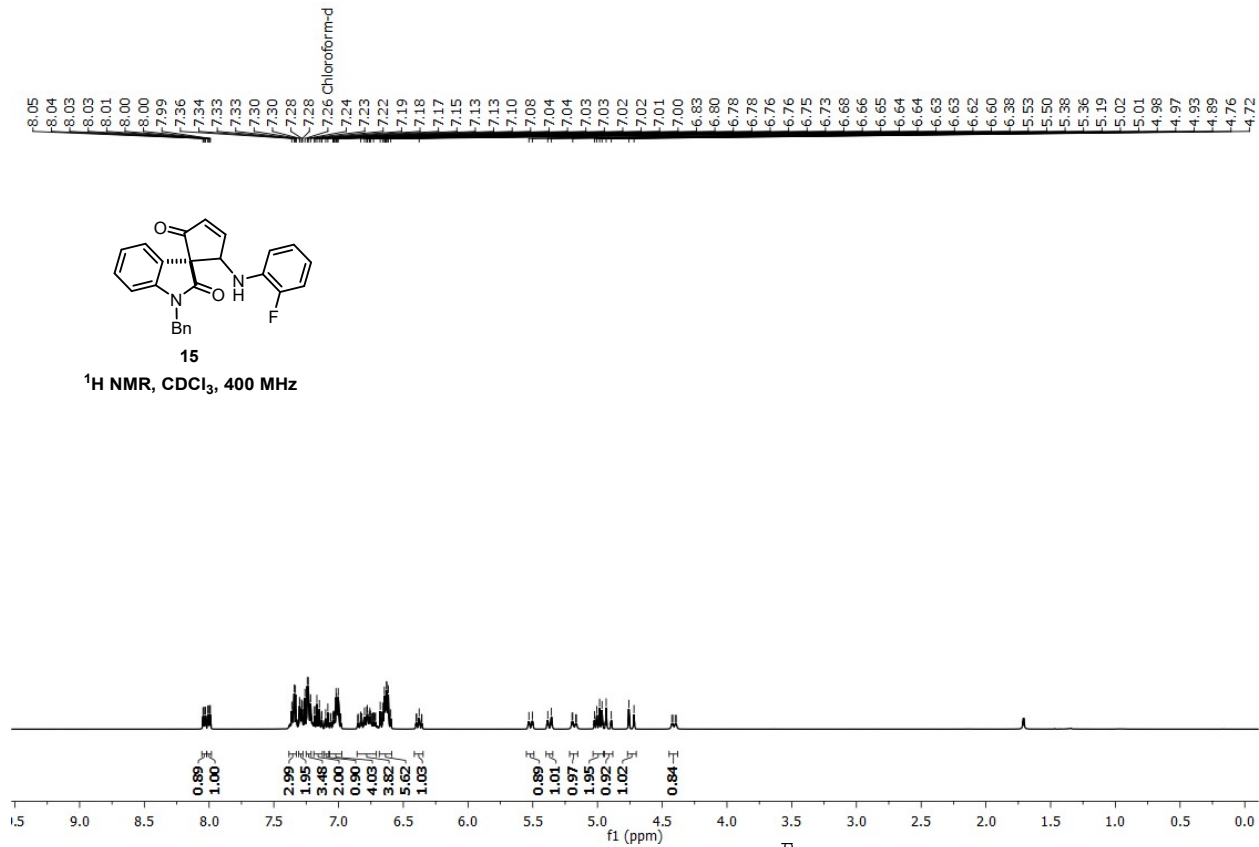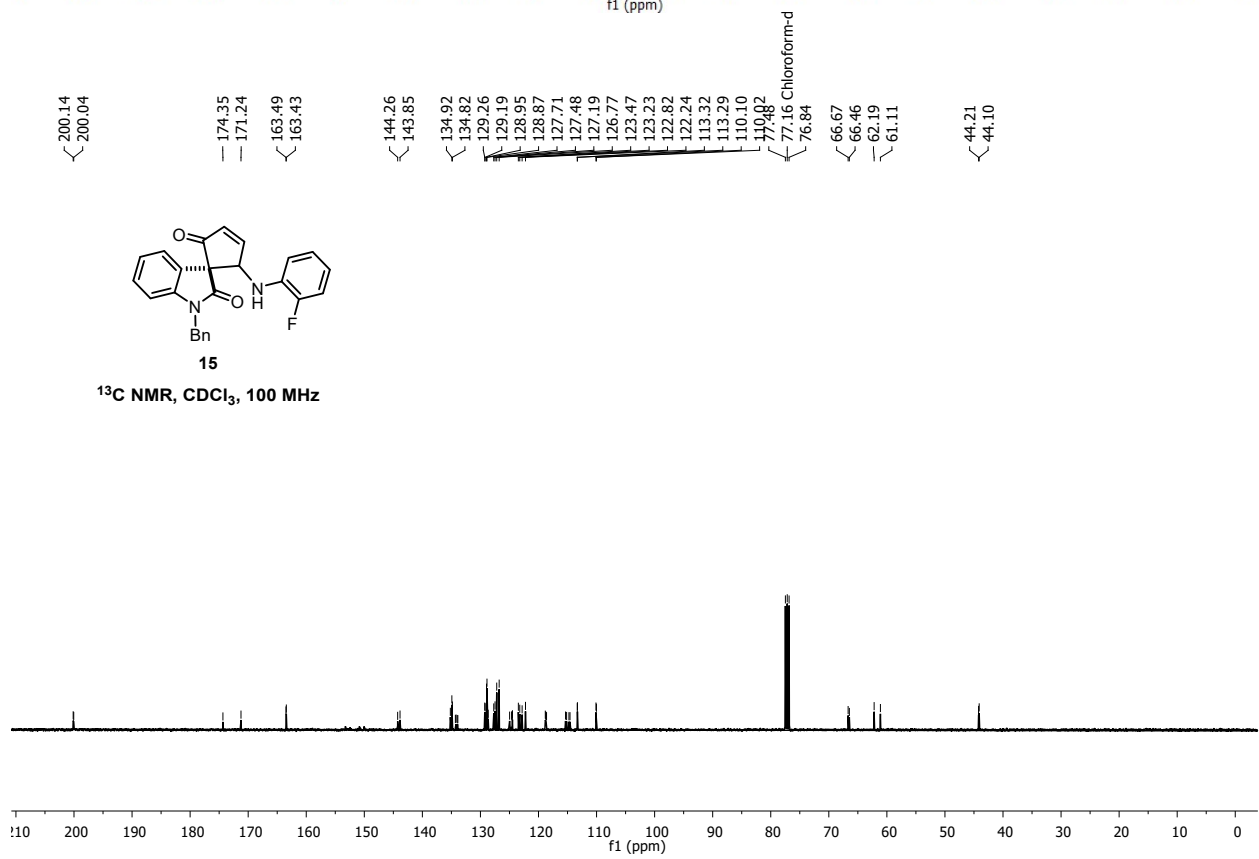



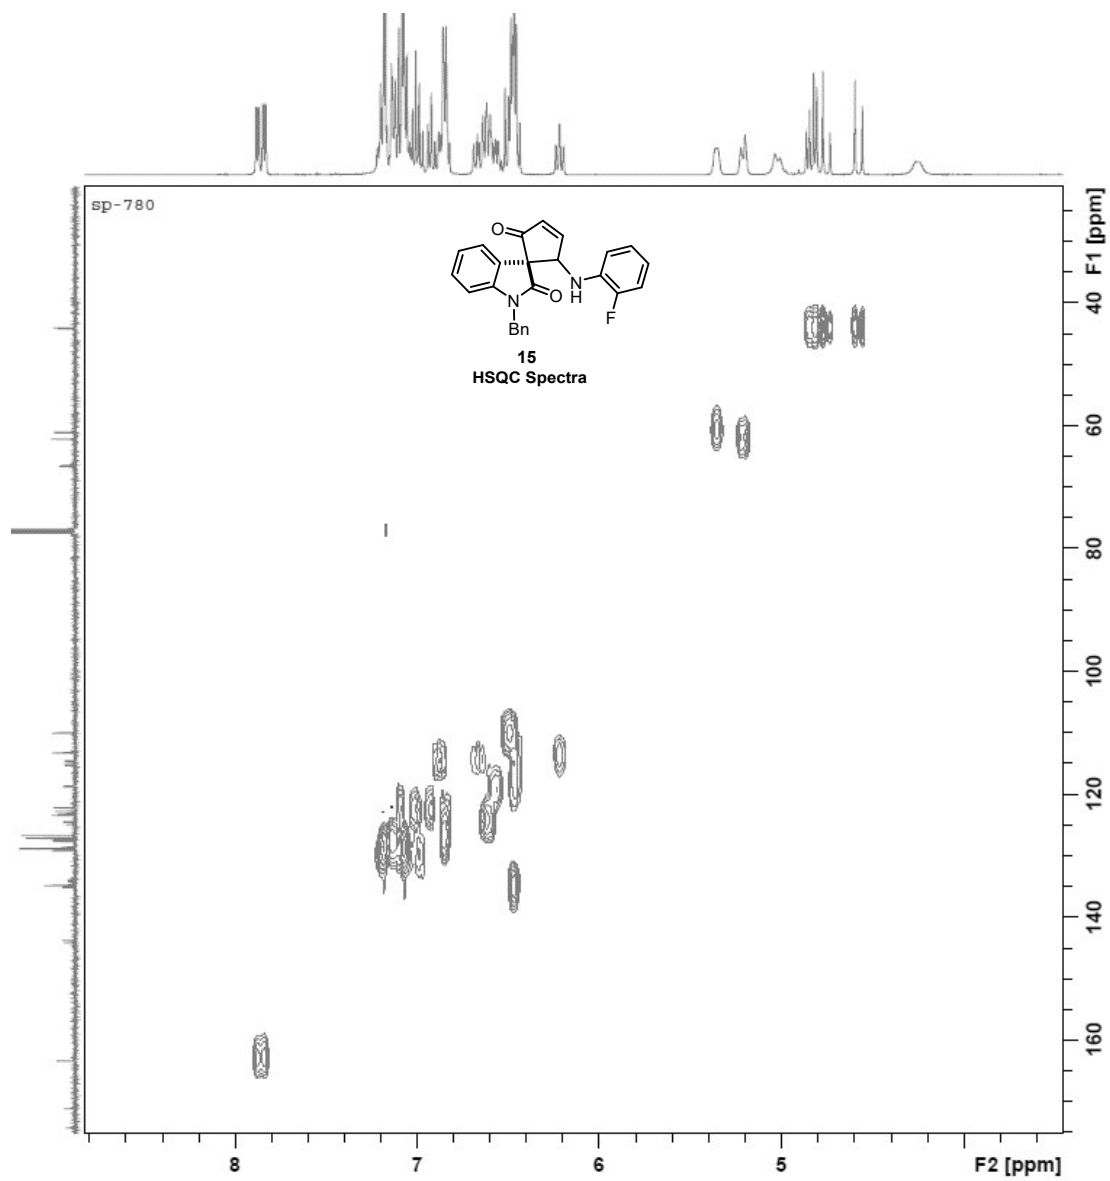

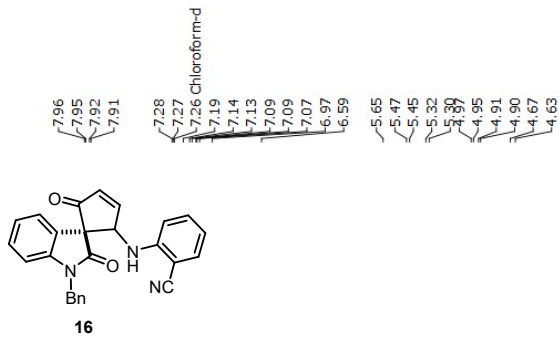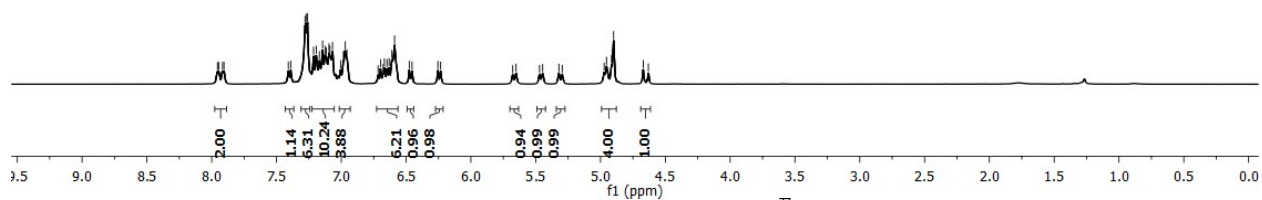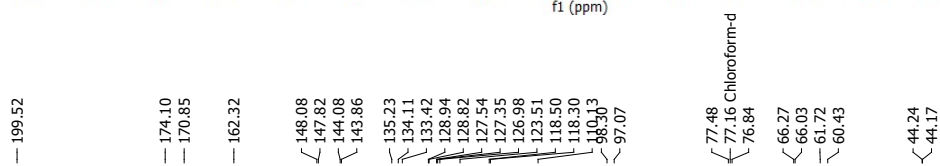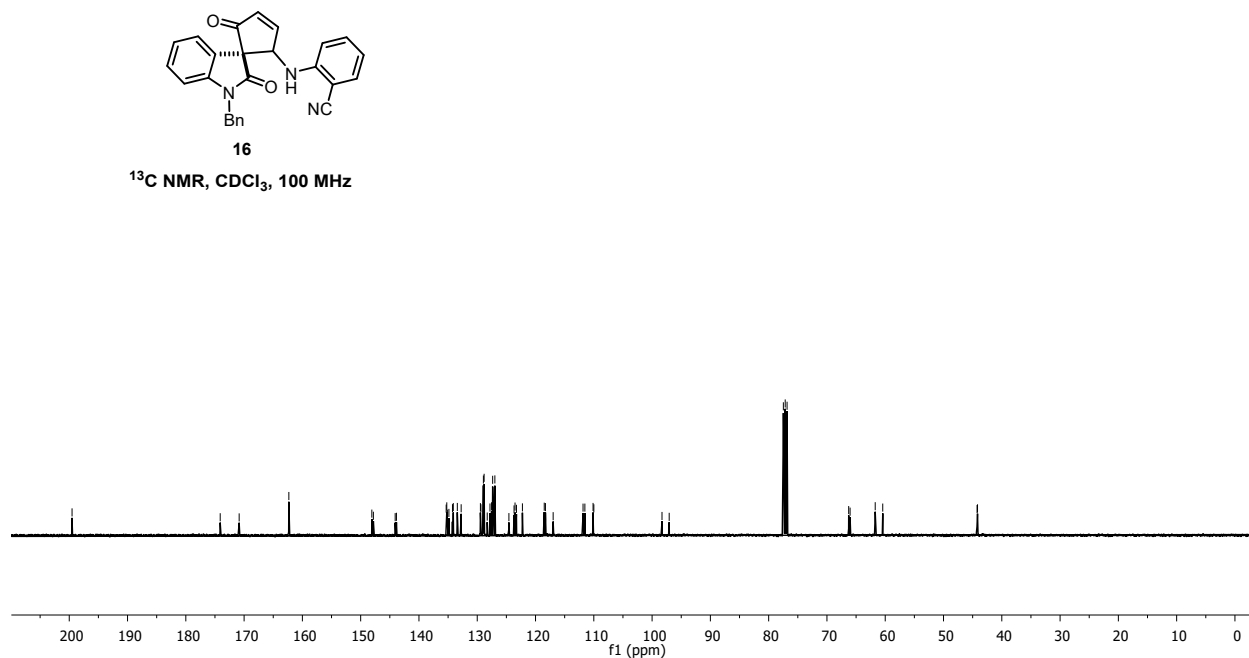

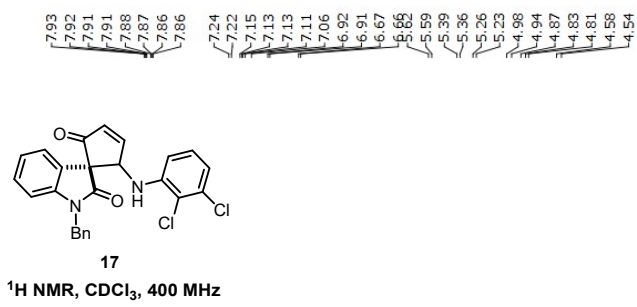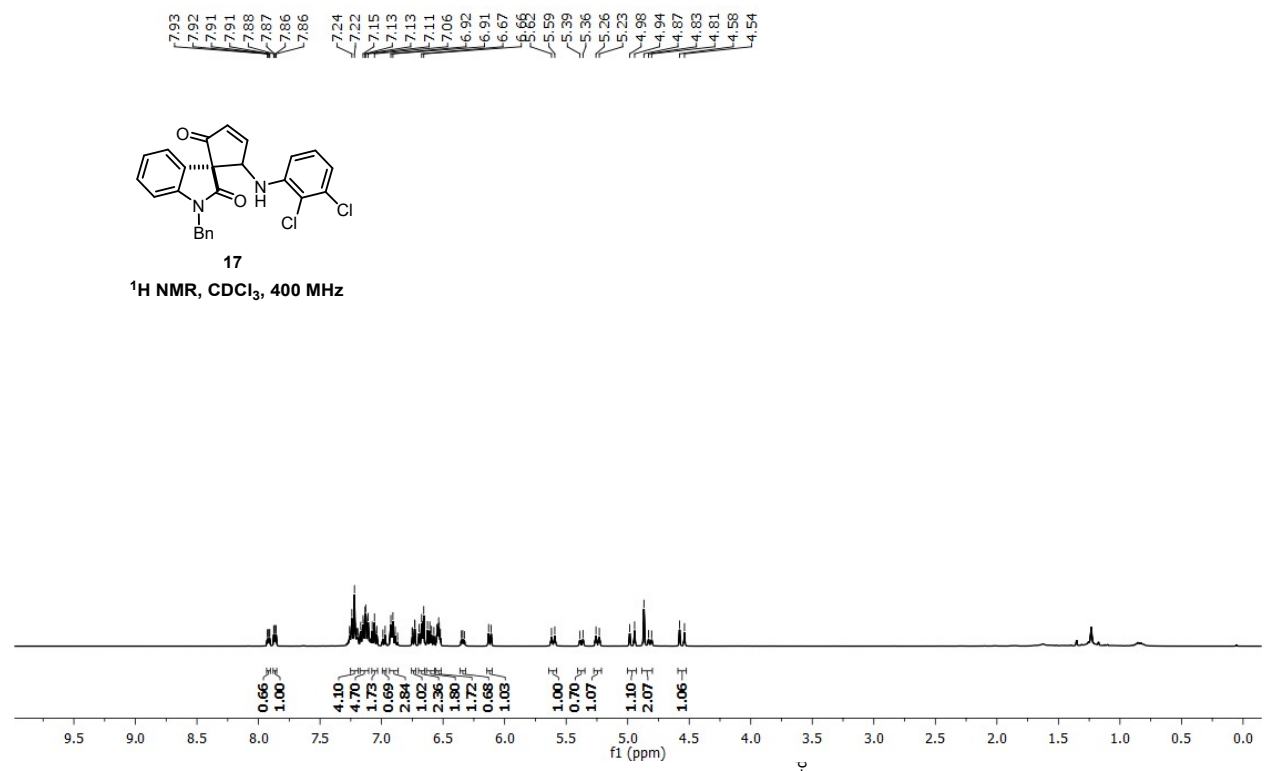

- 199.77, 199.72
- 174.15, 171.01
- 162.82, 162.74
- 144.13, 143.90, 143.40, 143.06
- 135.00, 129.42, 128.96, 128.82, 127.58, 127.29, 126.89, 119.70, 110.08, 110.00, 109.78
- 77.48, 77.16, 76.84 (Chloroform-c)
- 66.72, 66.21, 61.99, 61.01
- 44.24, 44.22

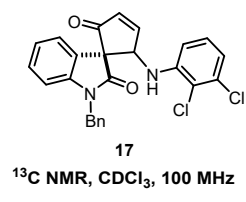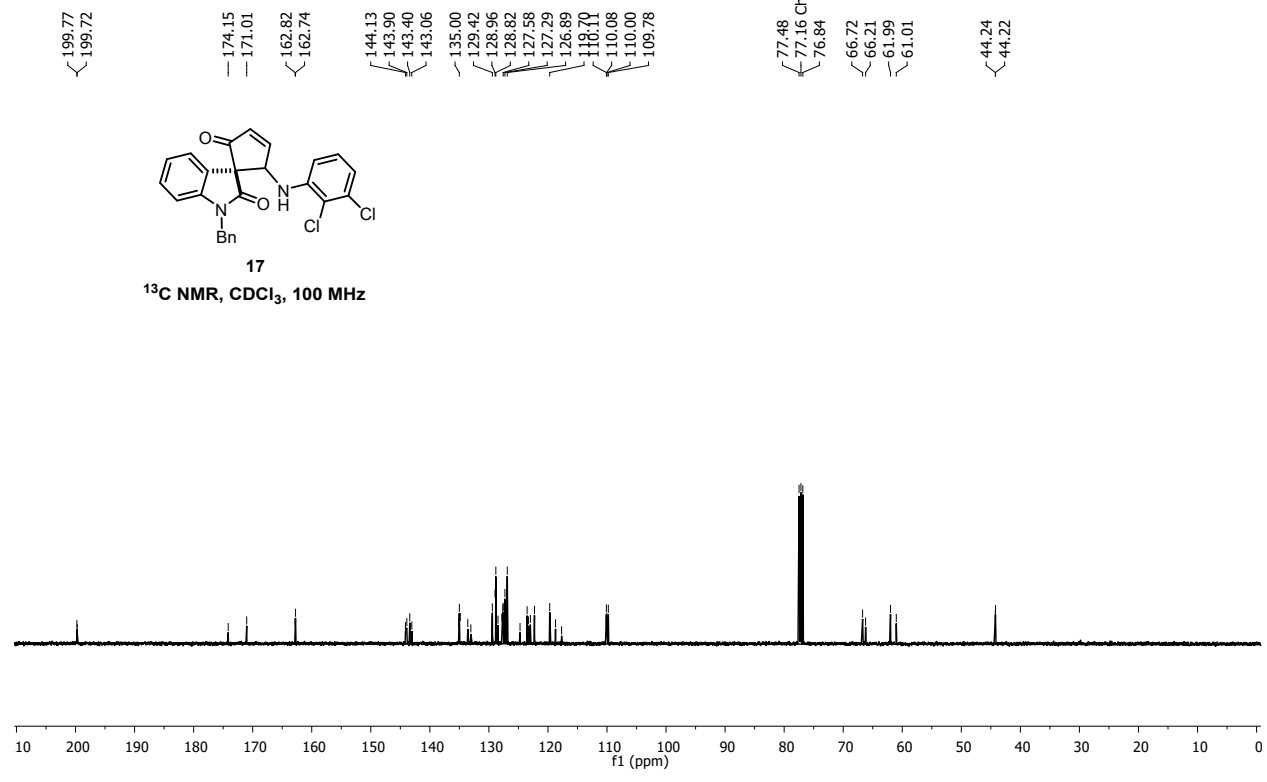

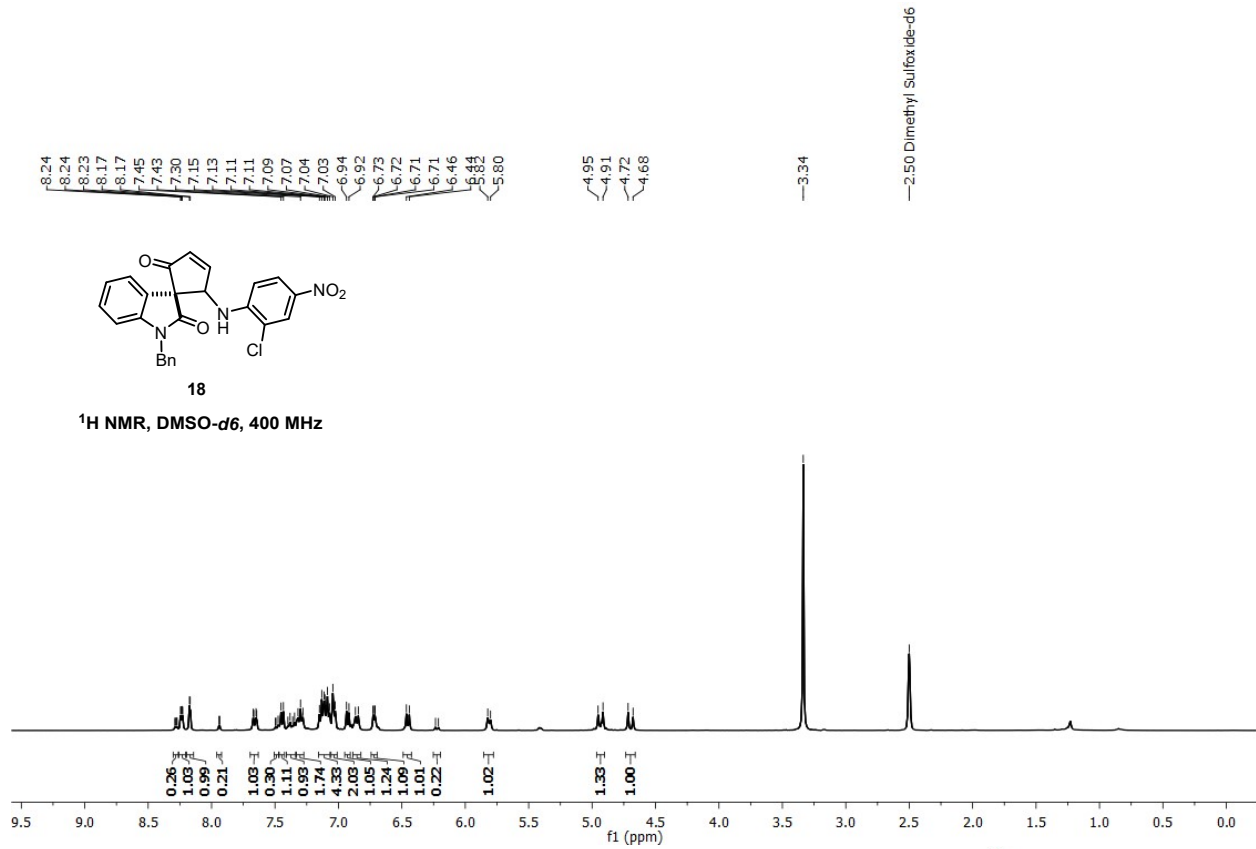

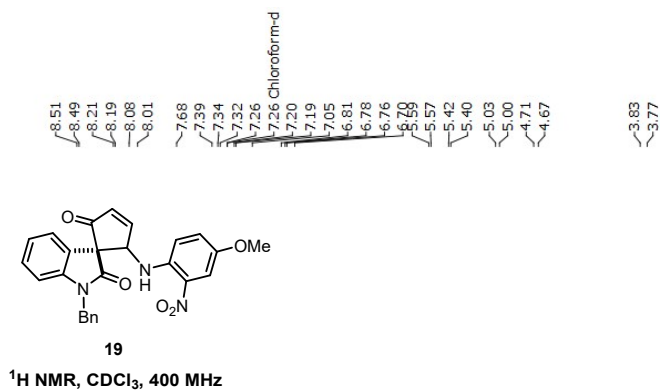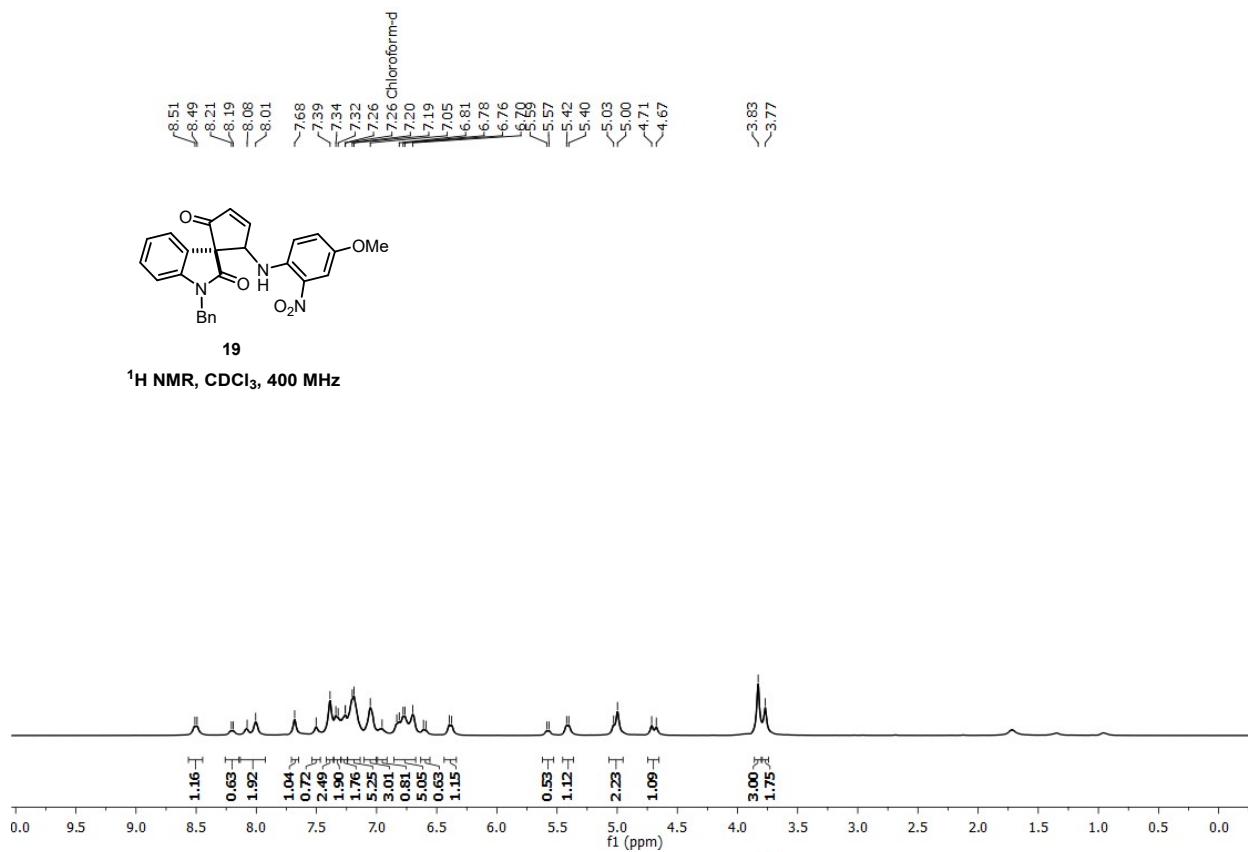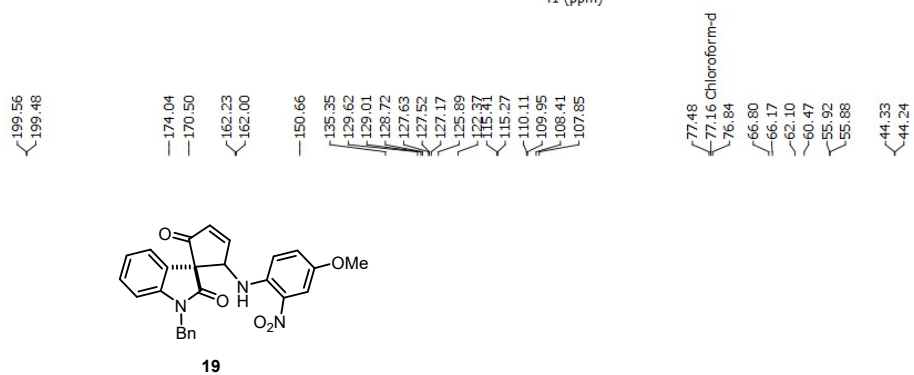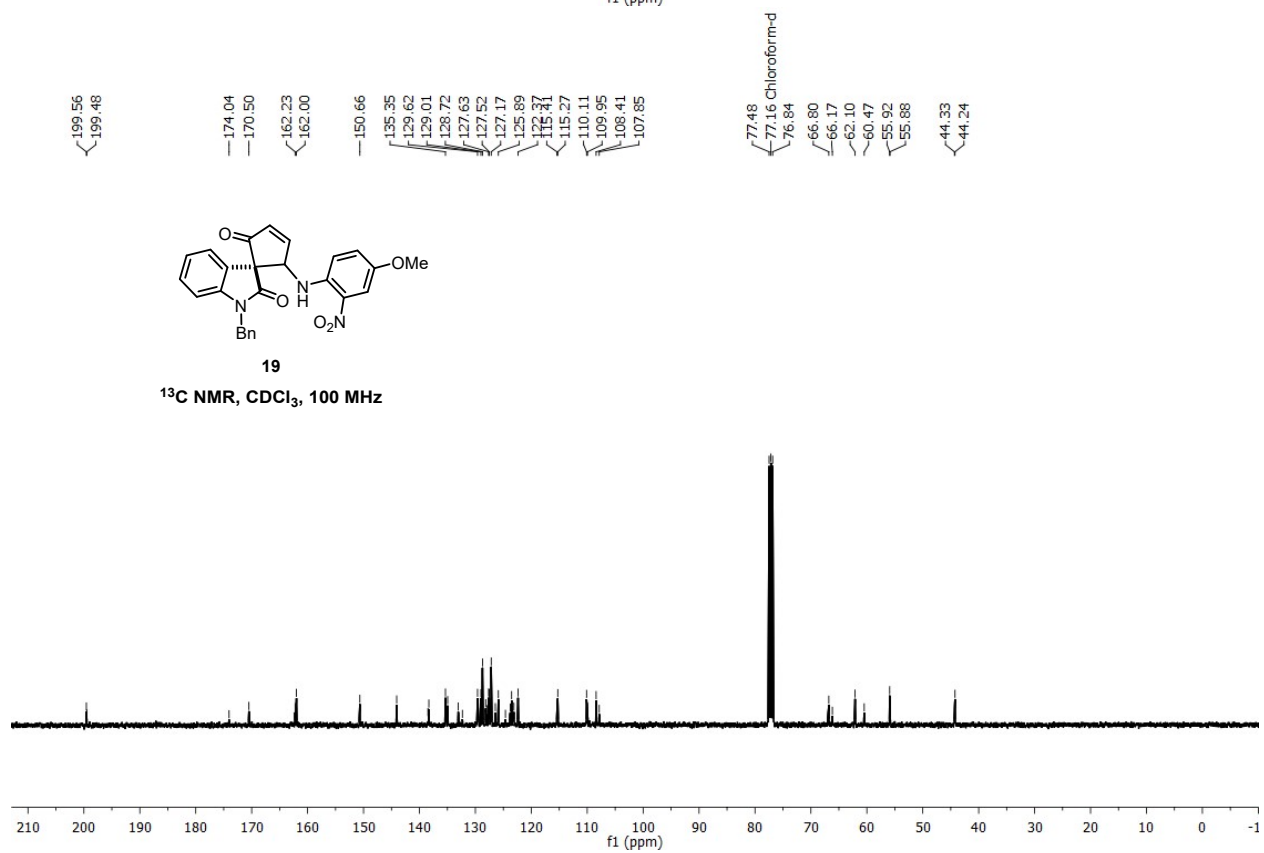



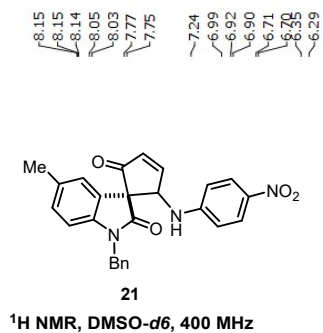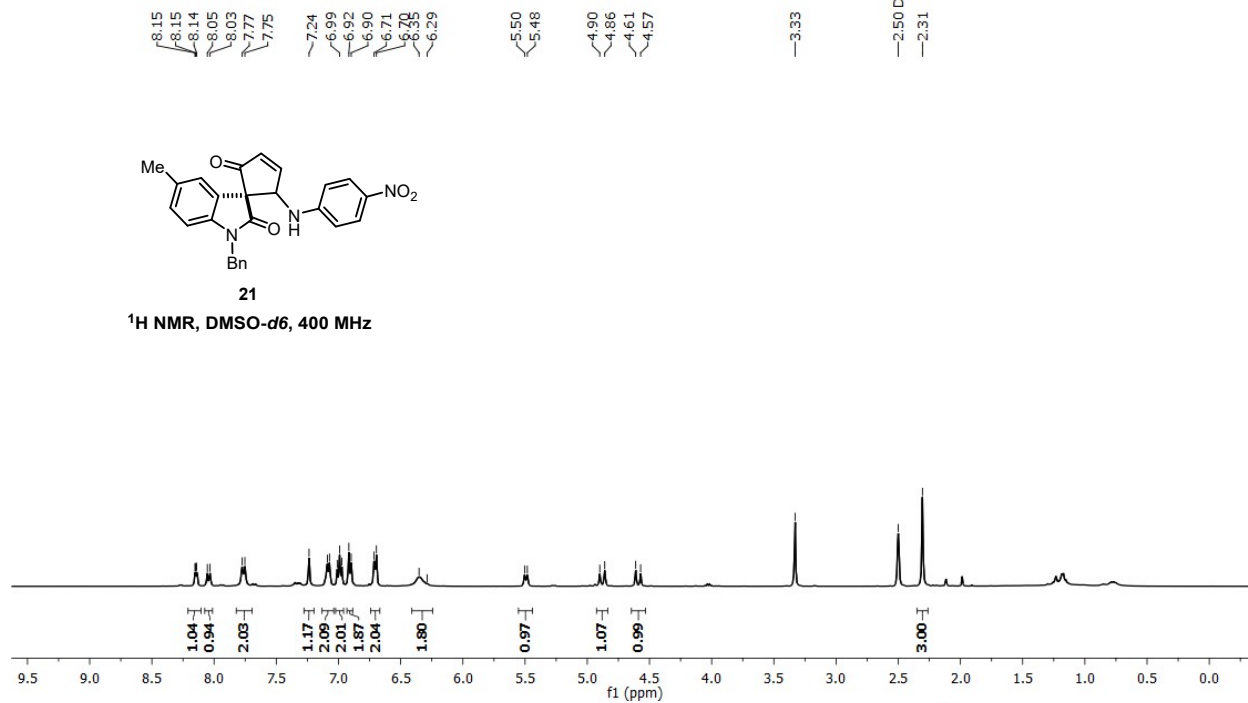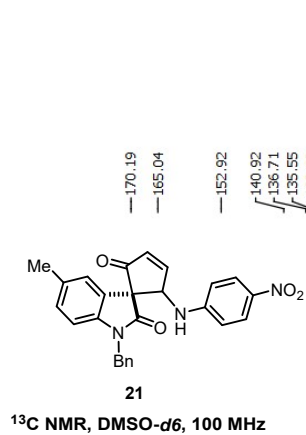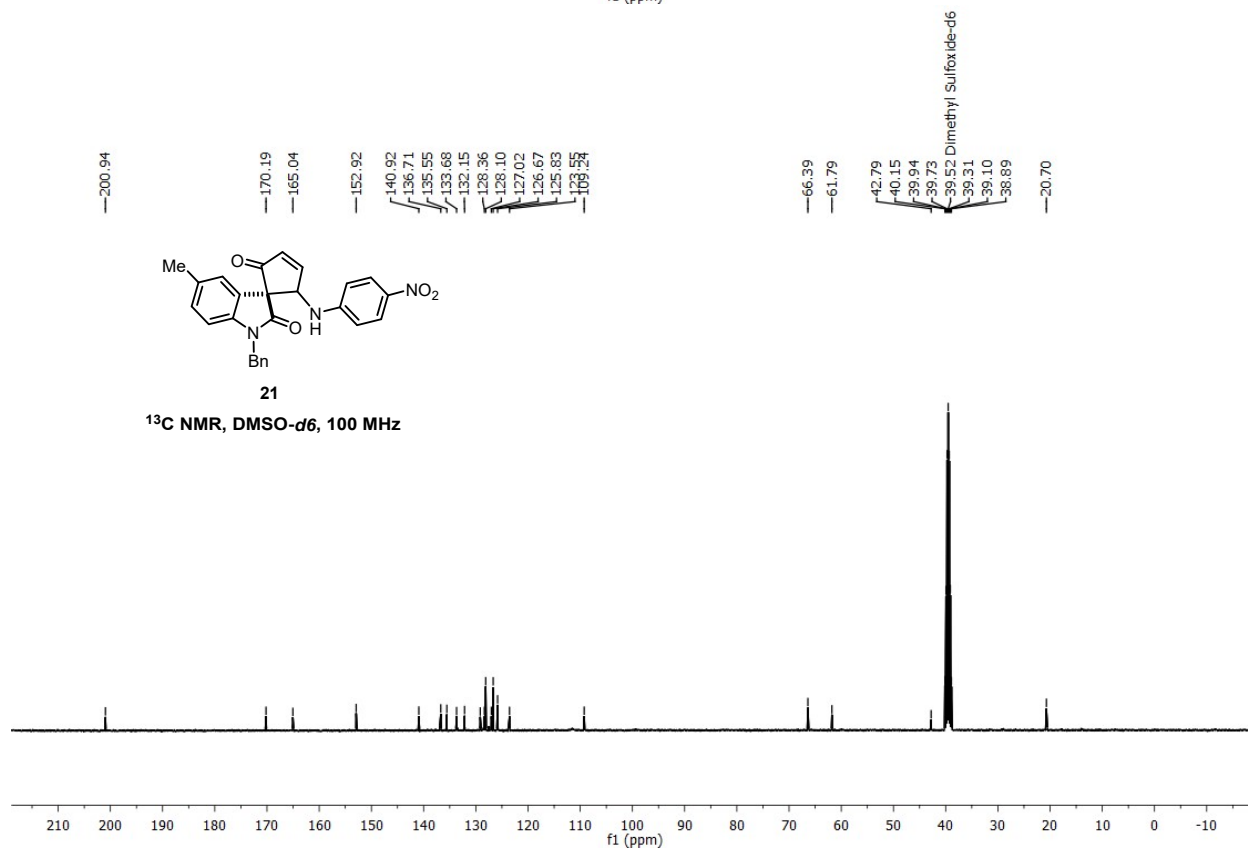

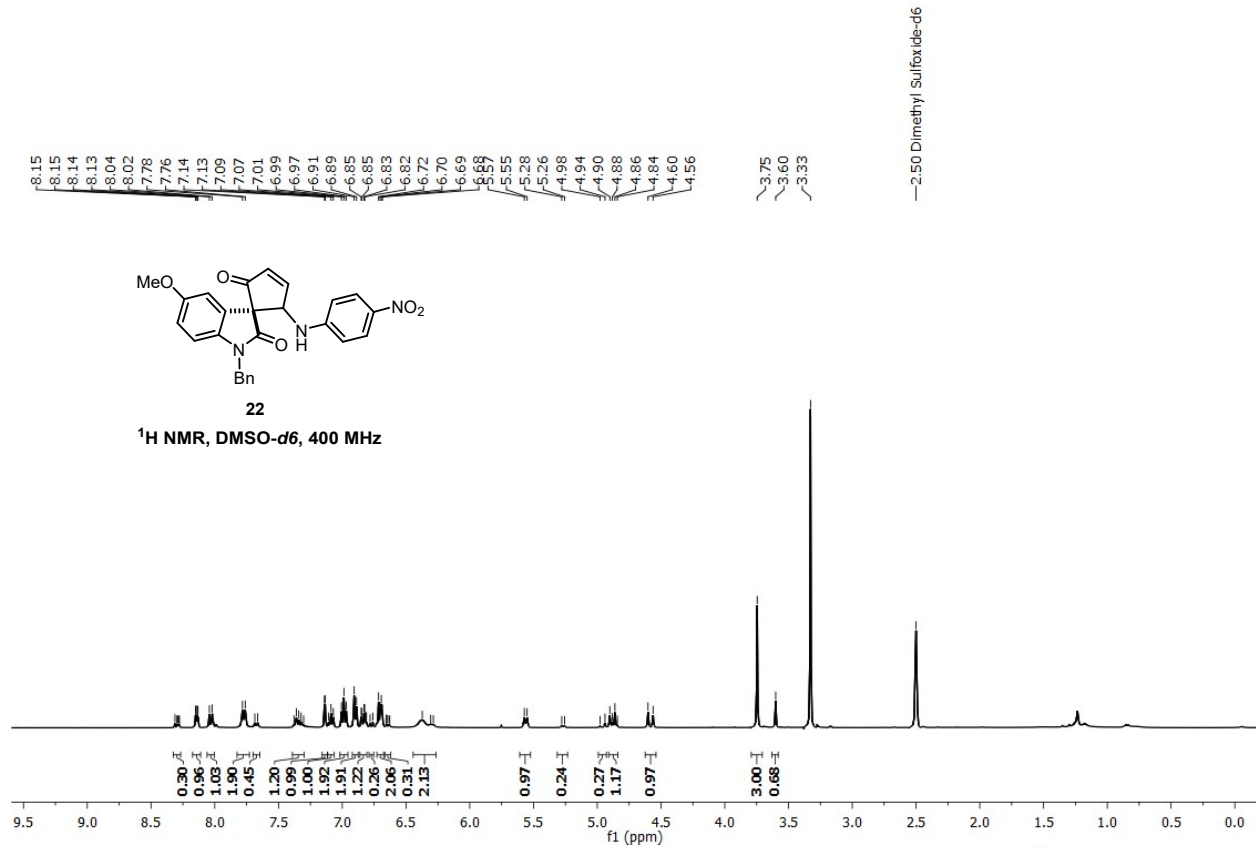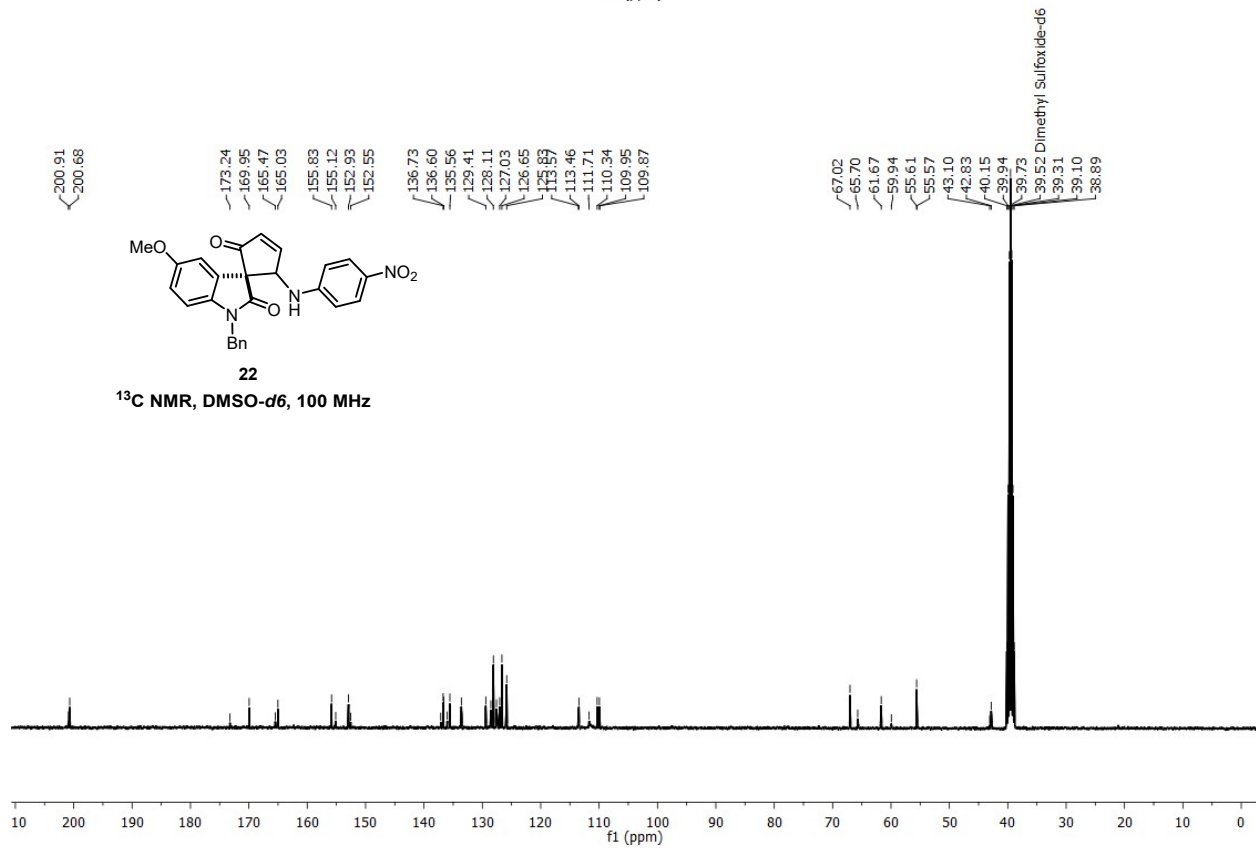

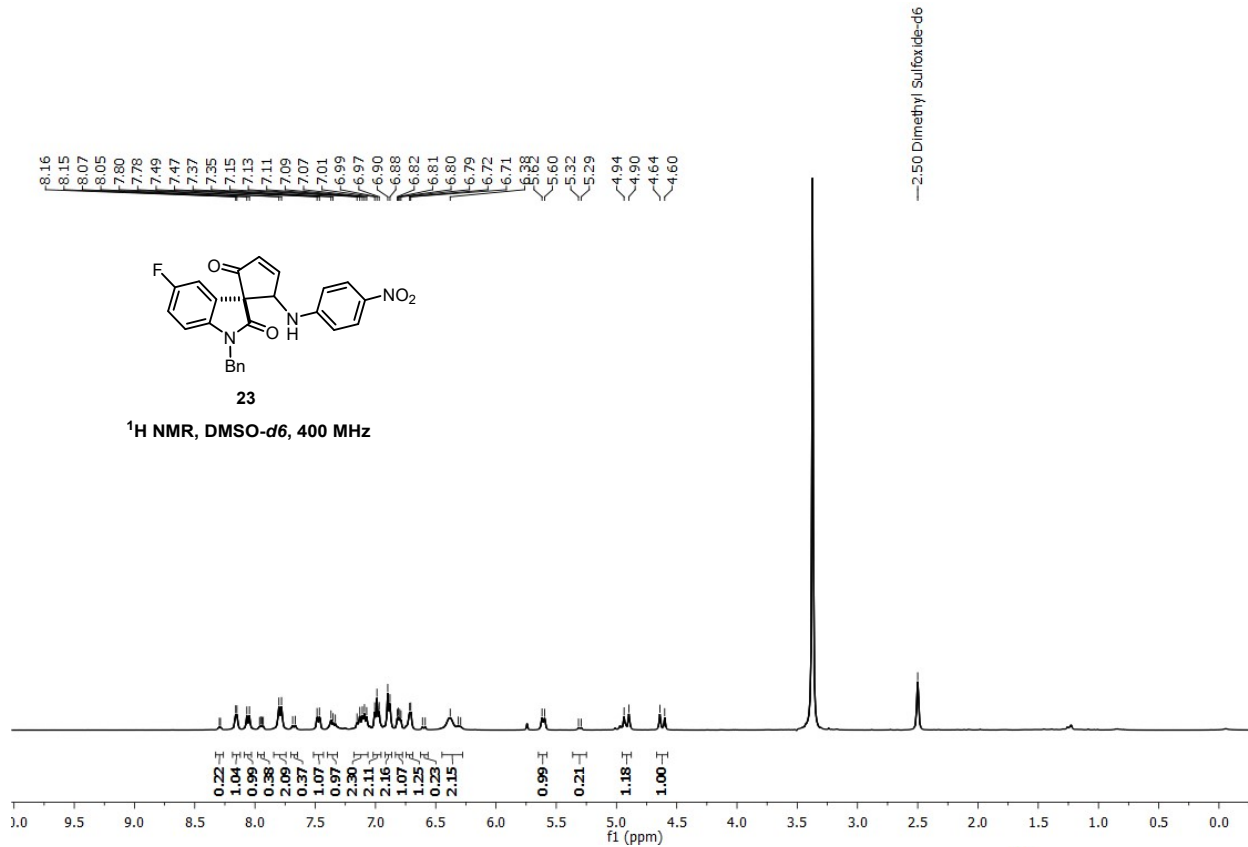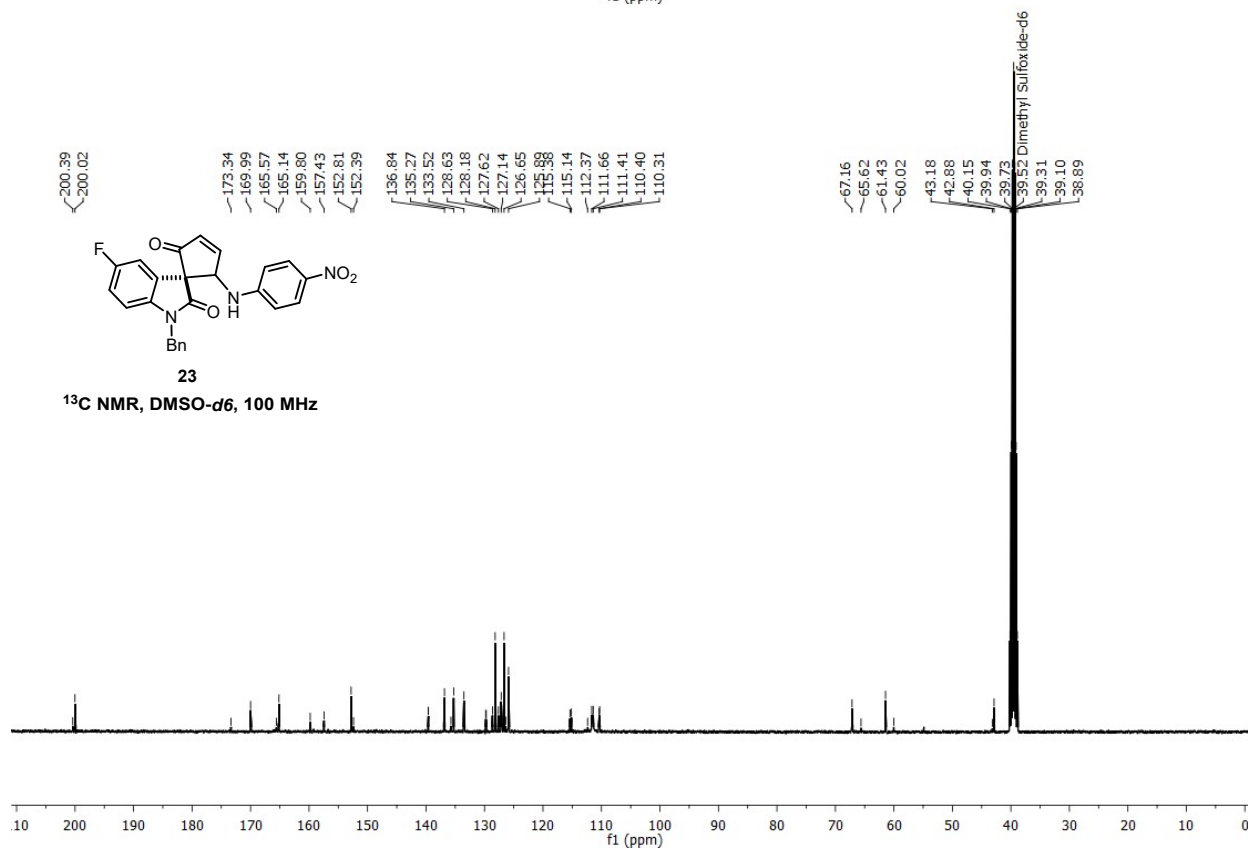

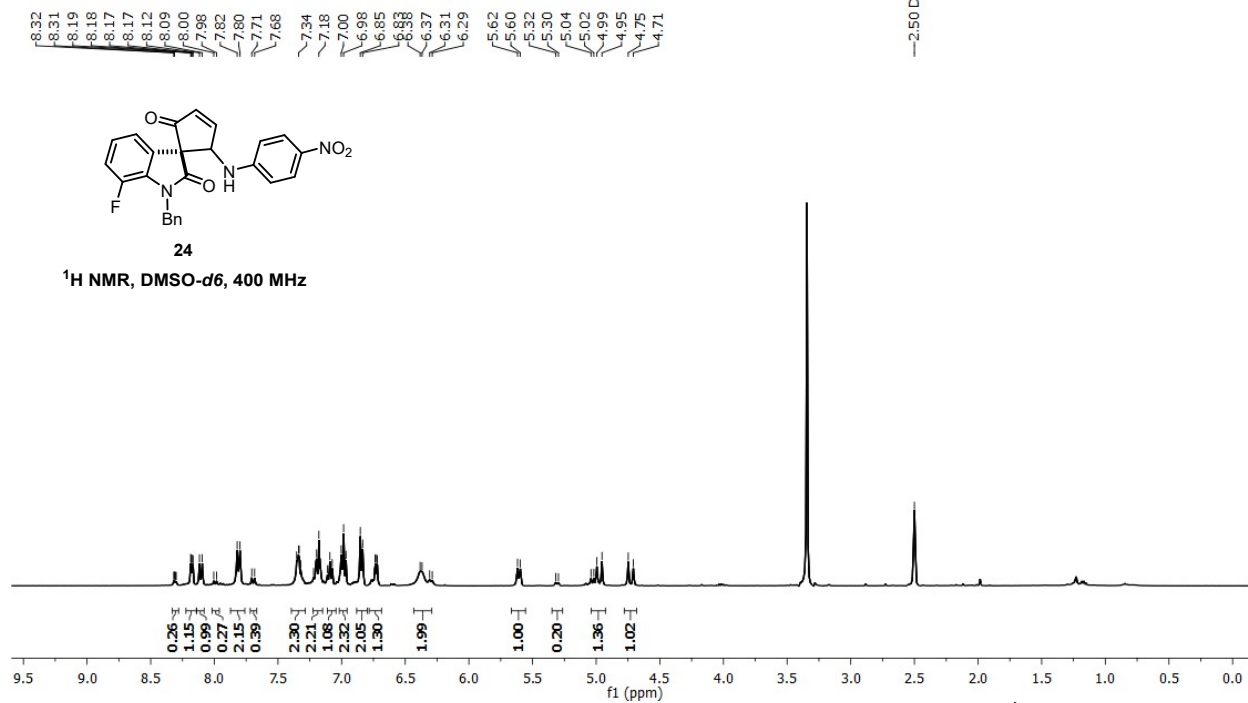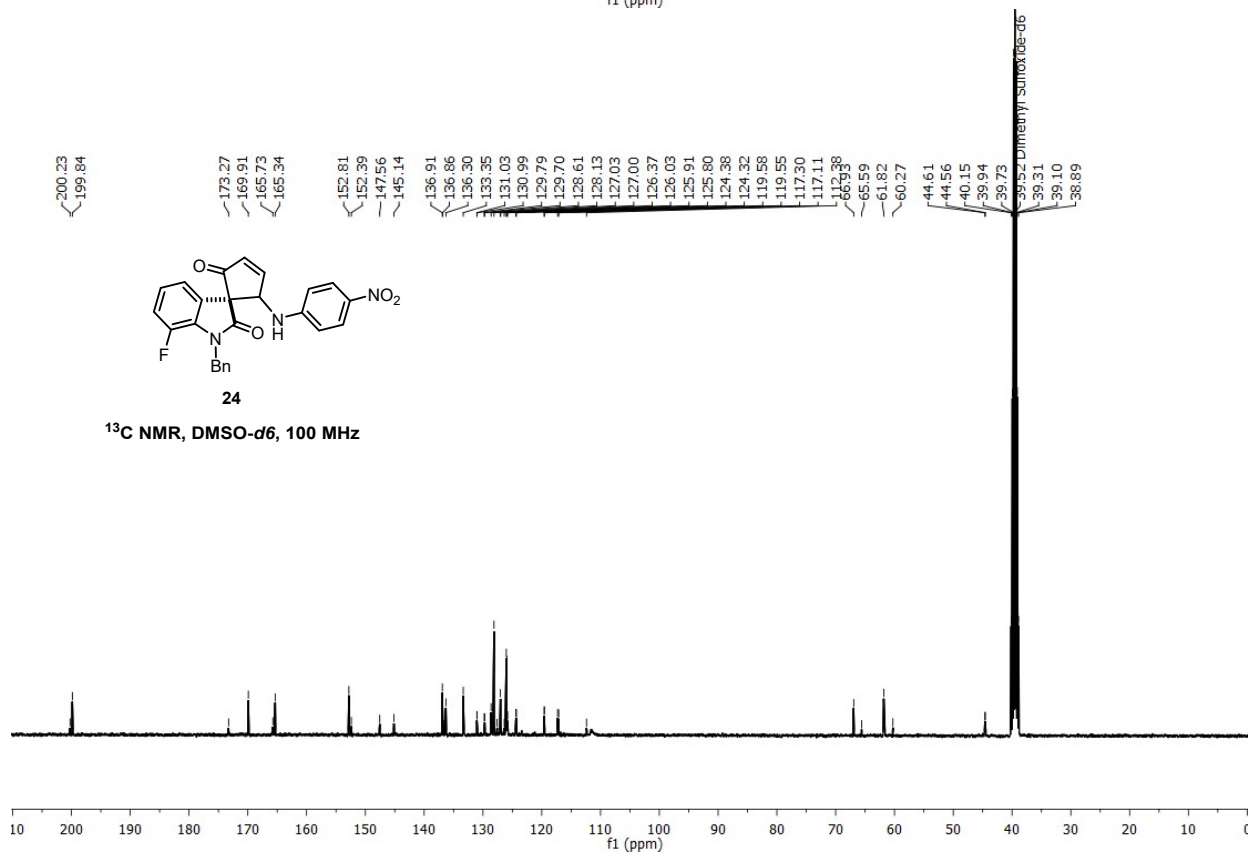

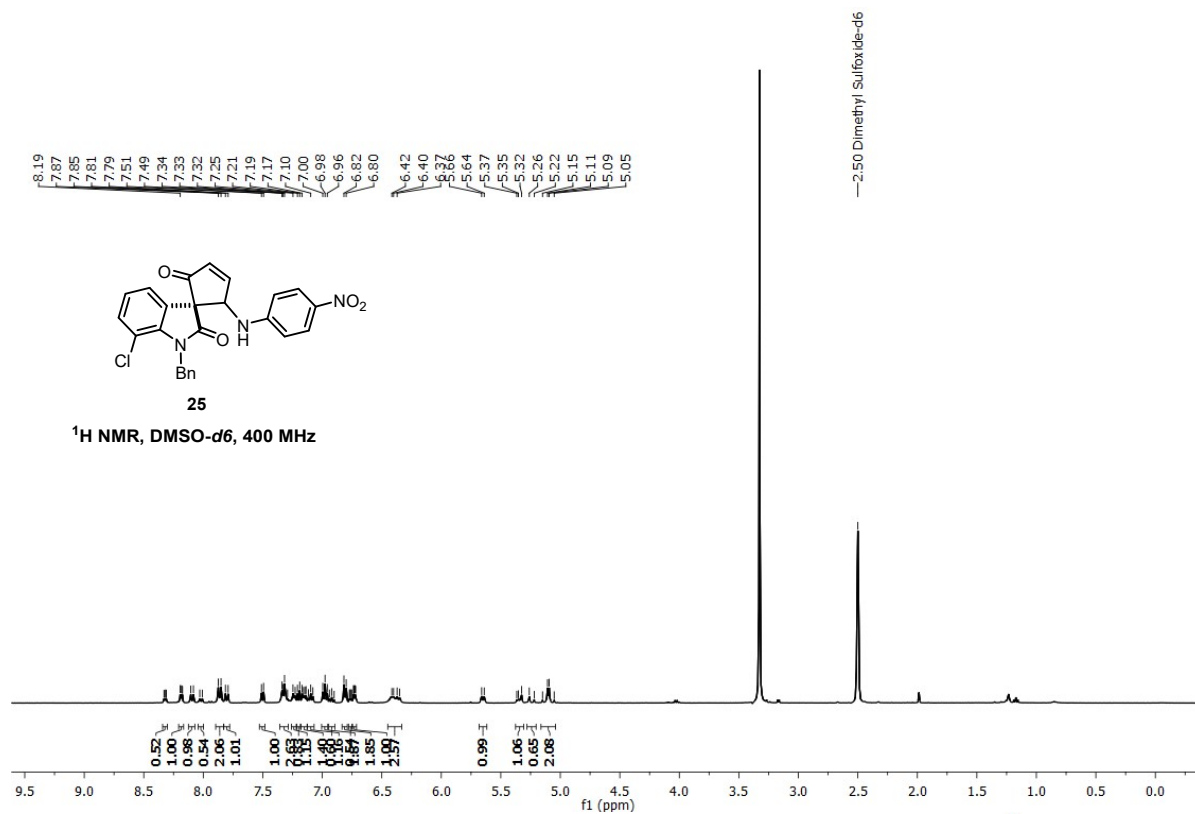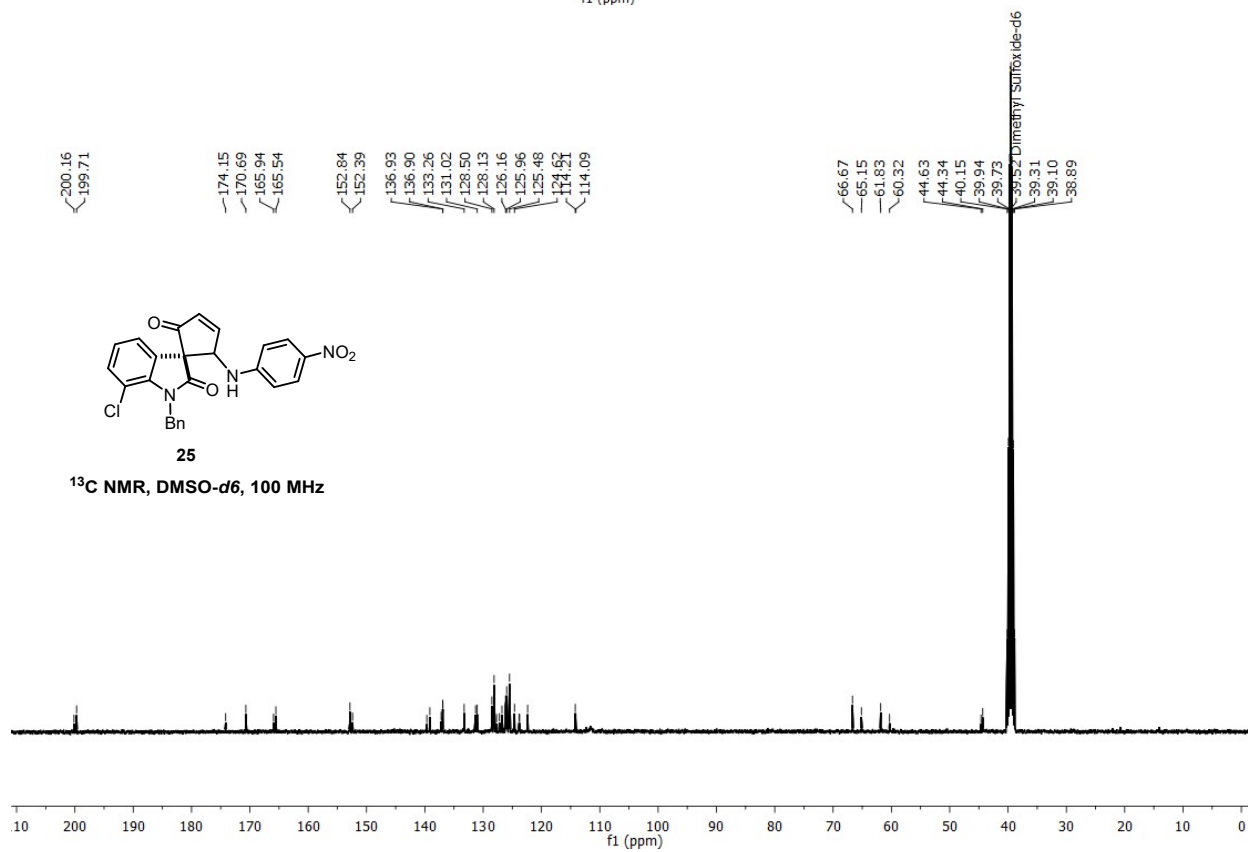

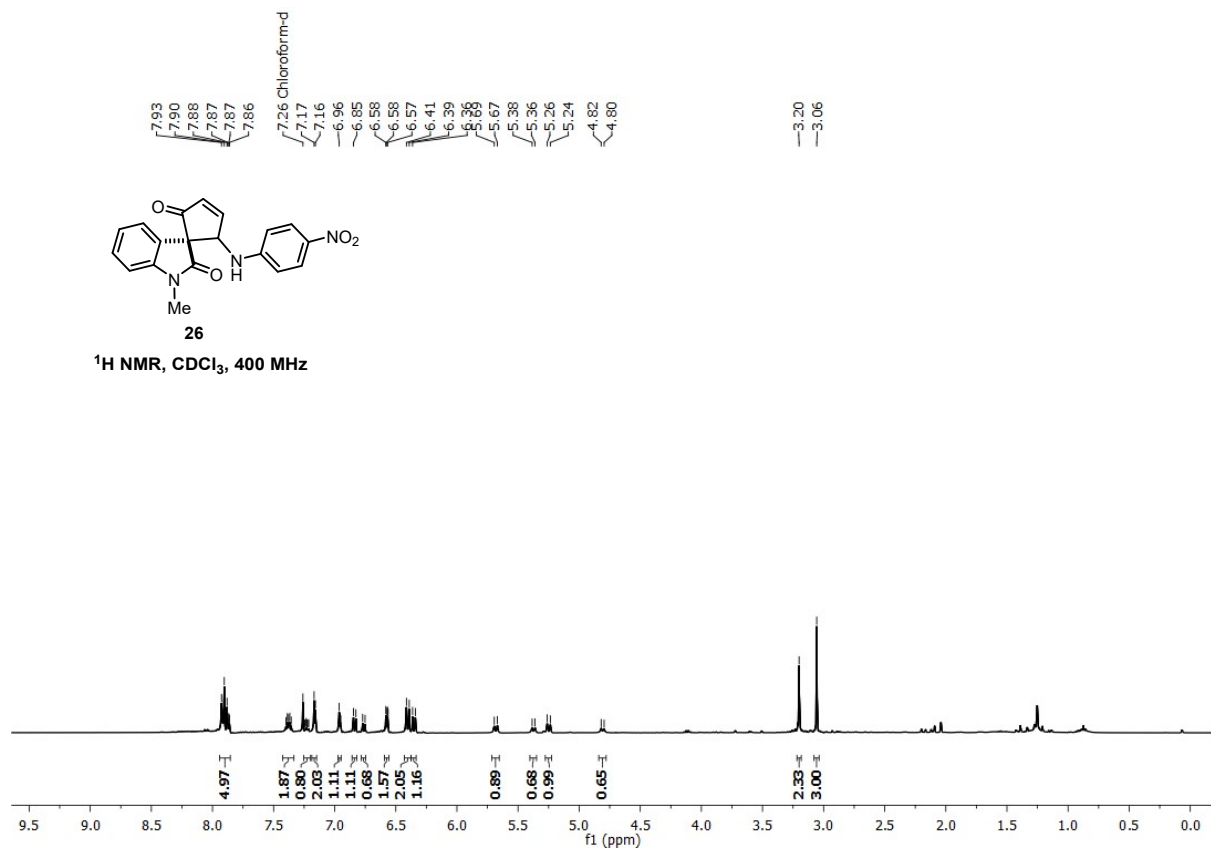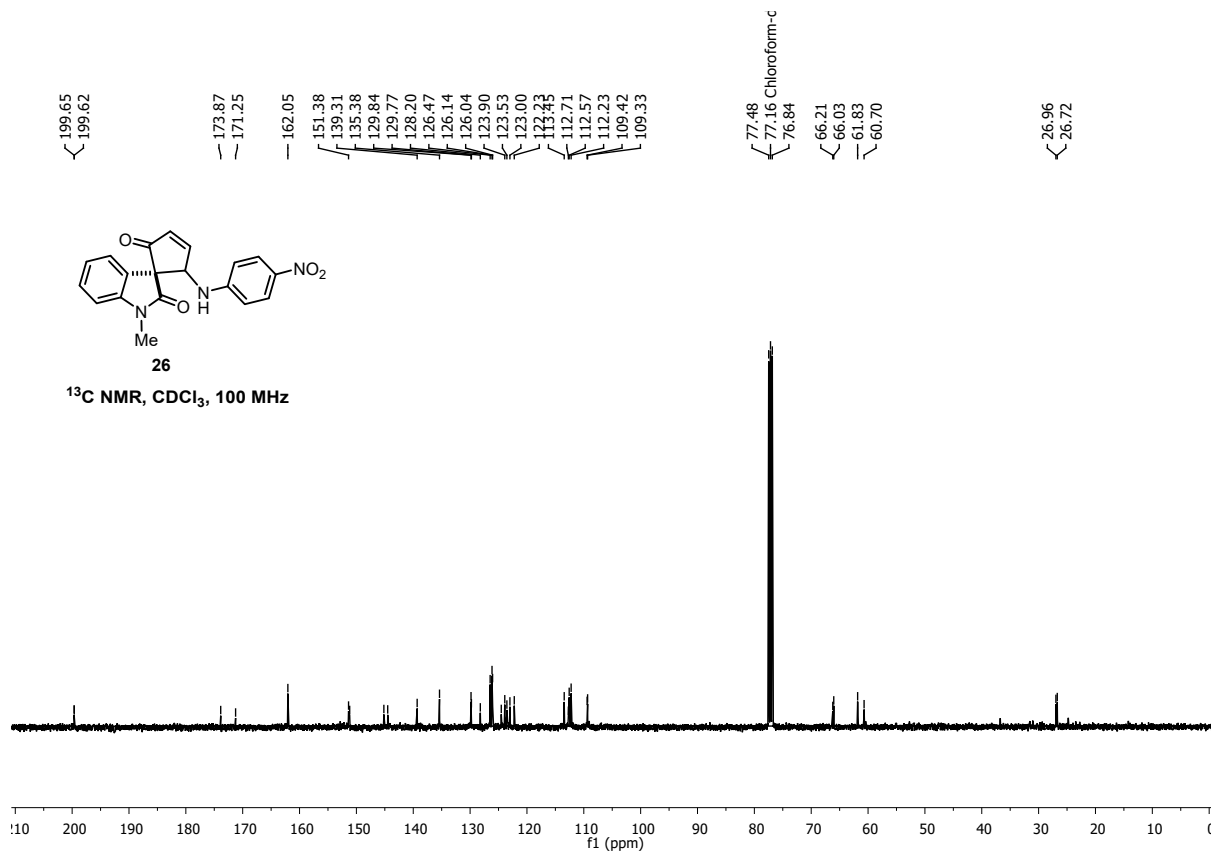

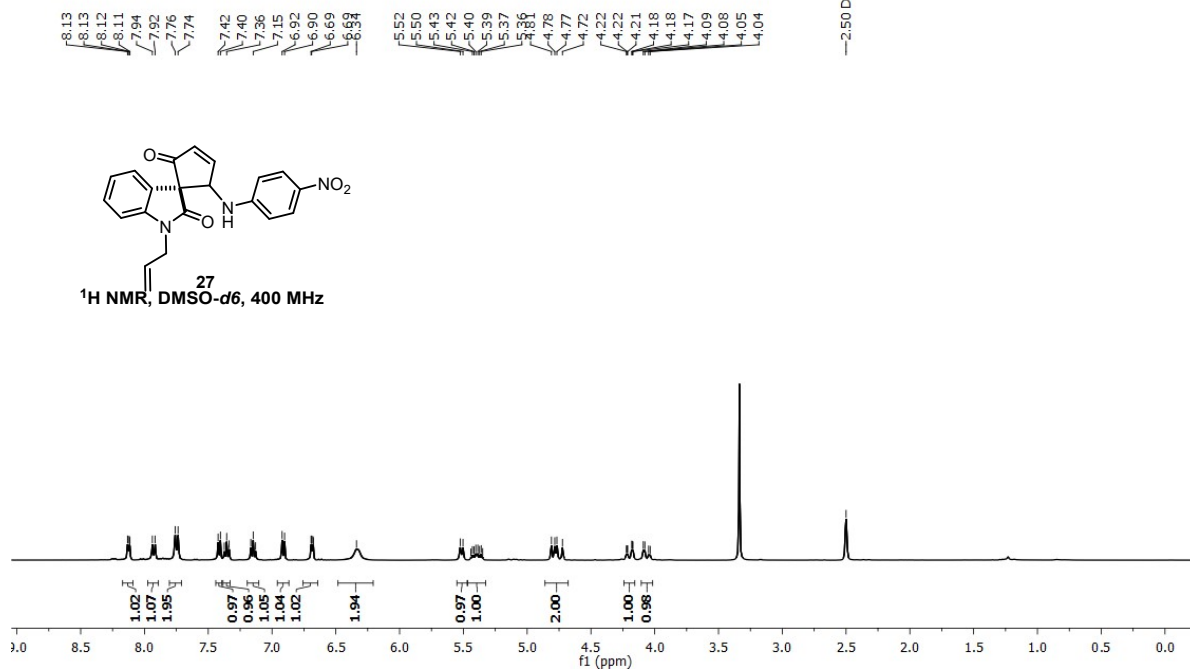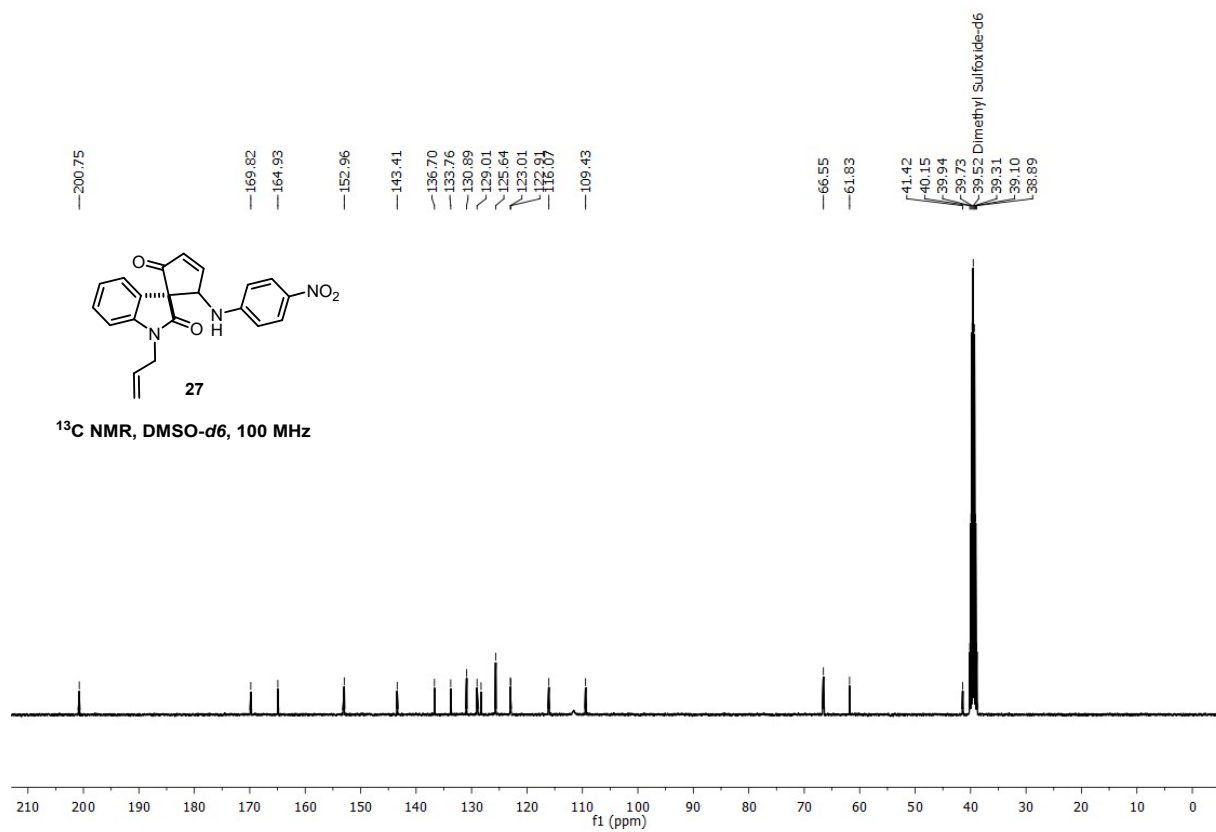

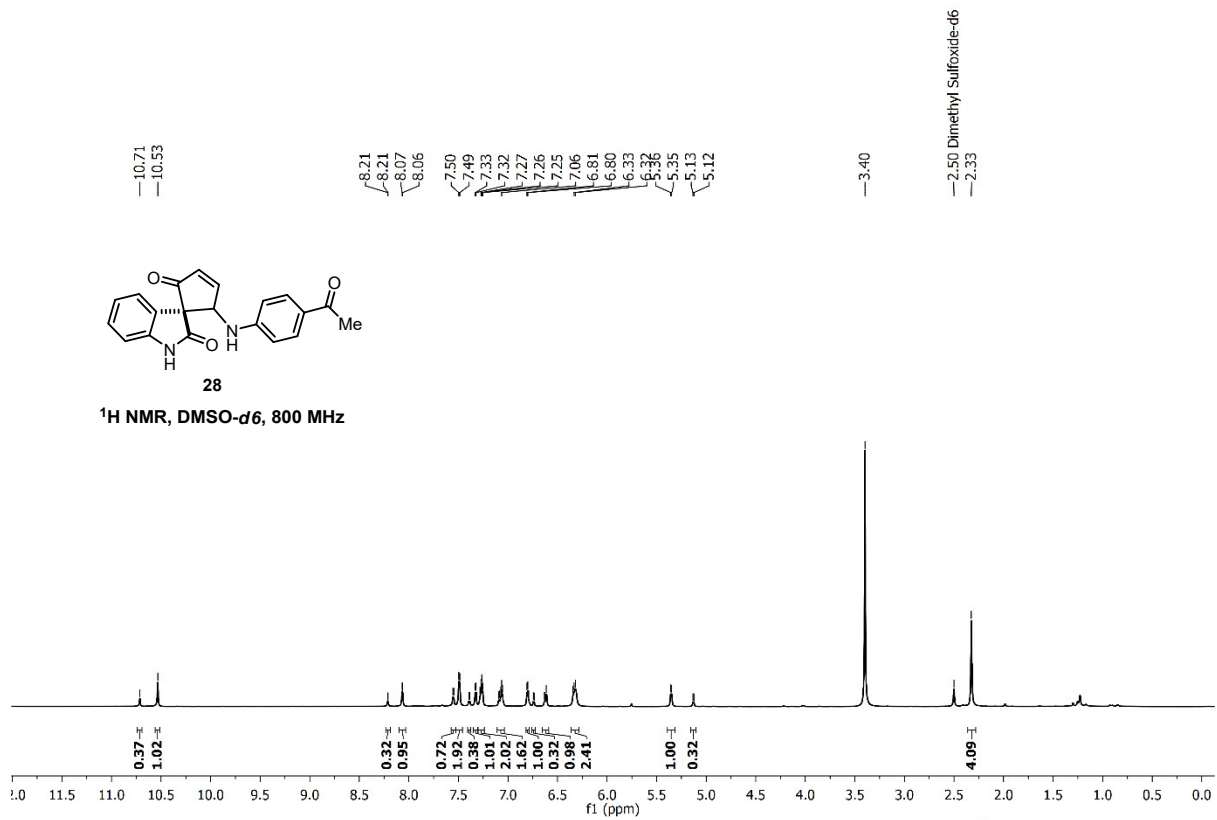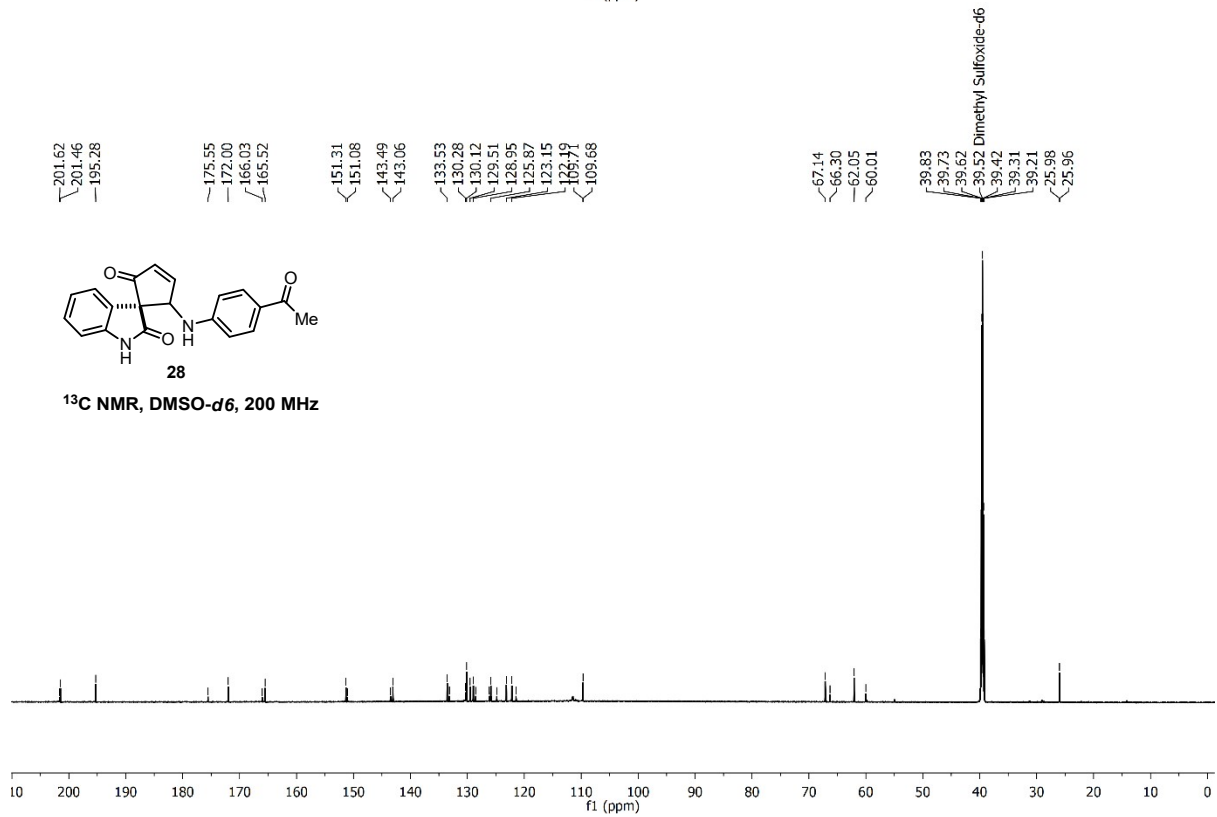



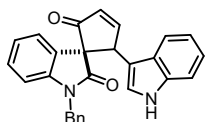

30

<sup>1</sup>H NMR, DMSO-d<sub>6</sub>, 400 MHz

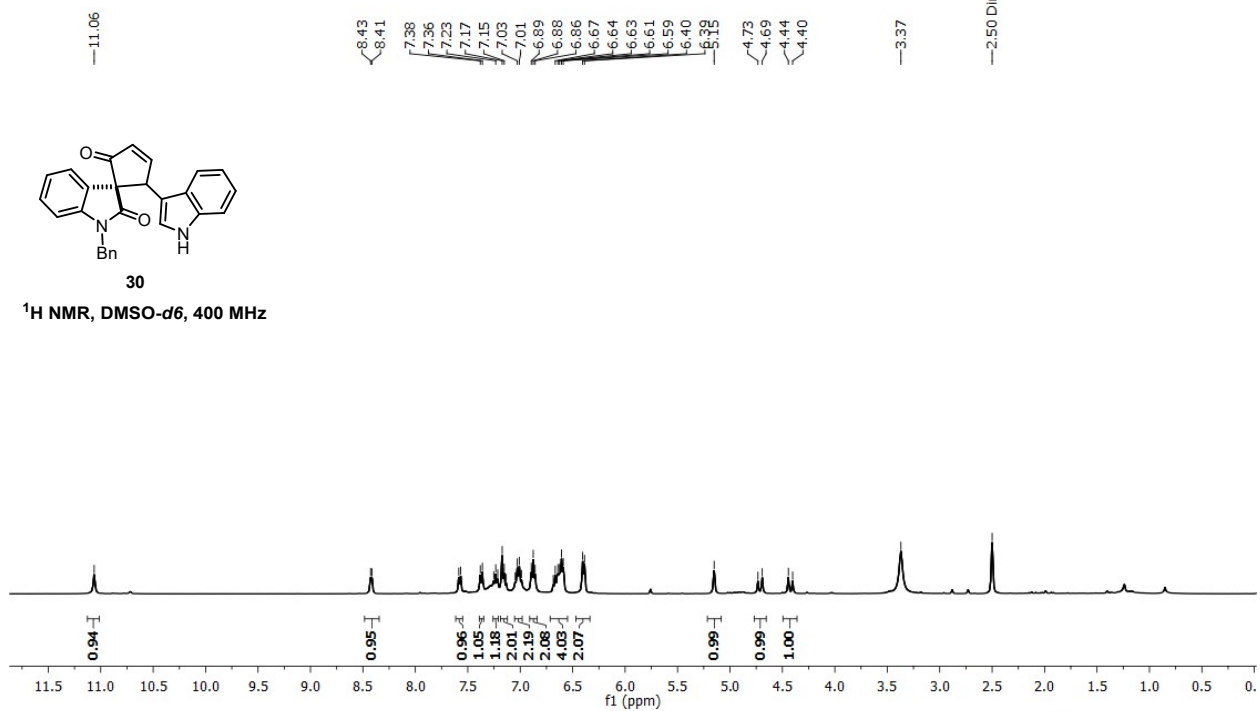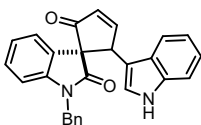

30

<sup>13</sup>C NMR, DMSO-d<sub>6</sub>, 100 MHz

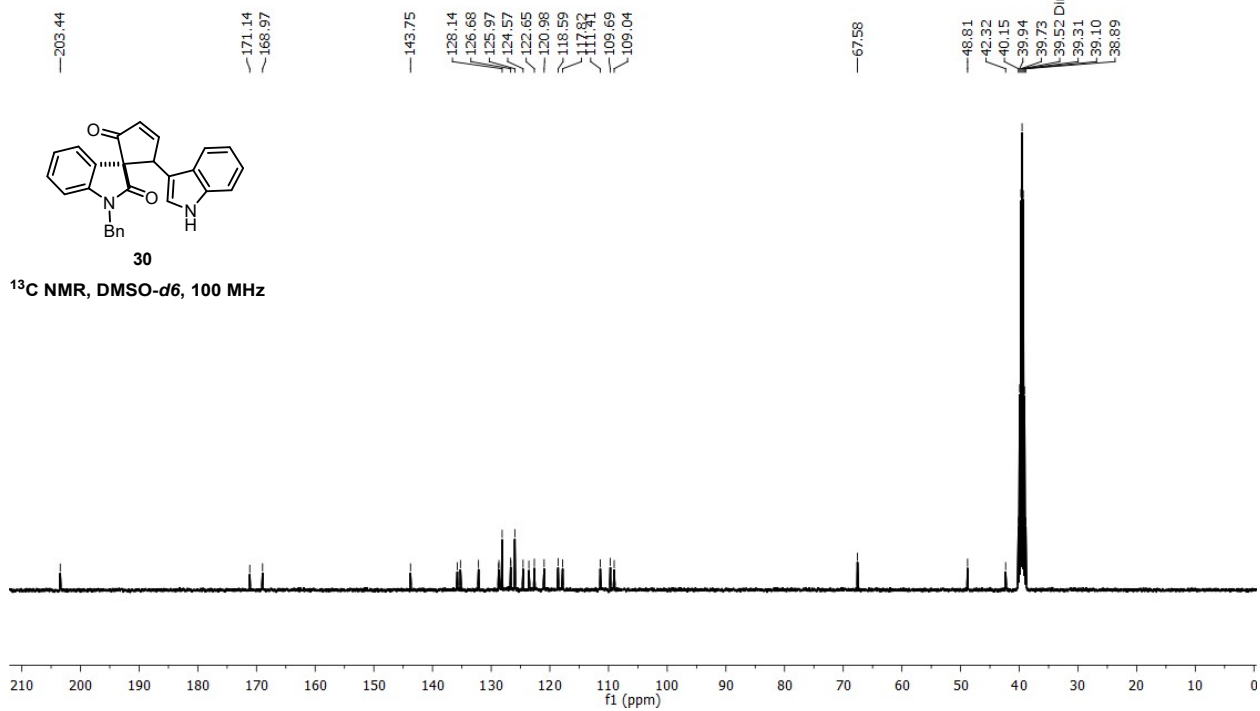

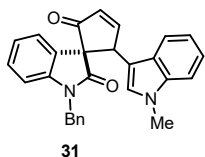

<sup>1</sup>H NMR, CDCl<sub>3</sub>, 400 MHz

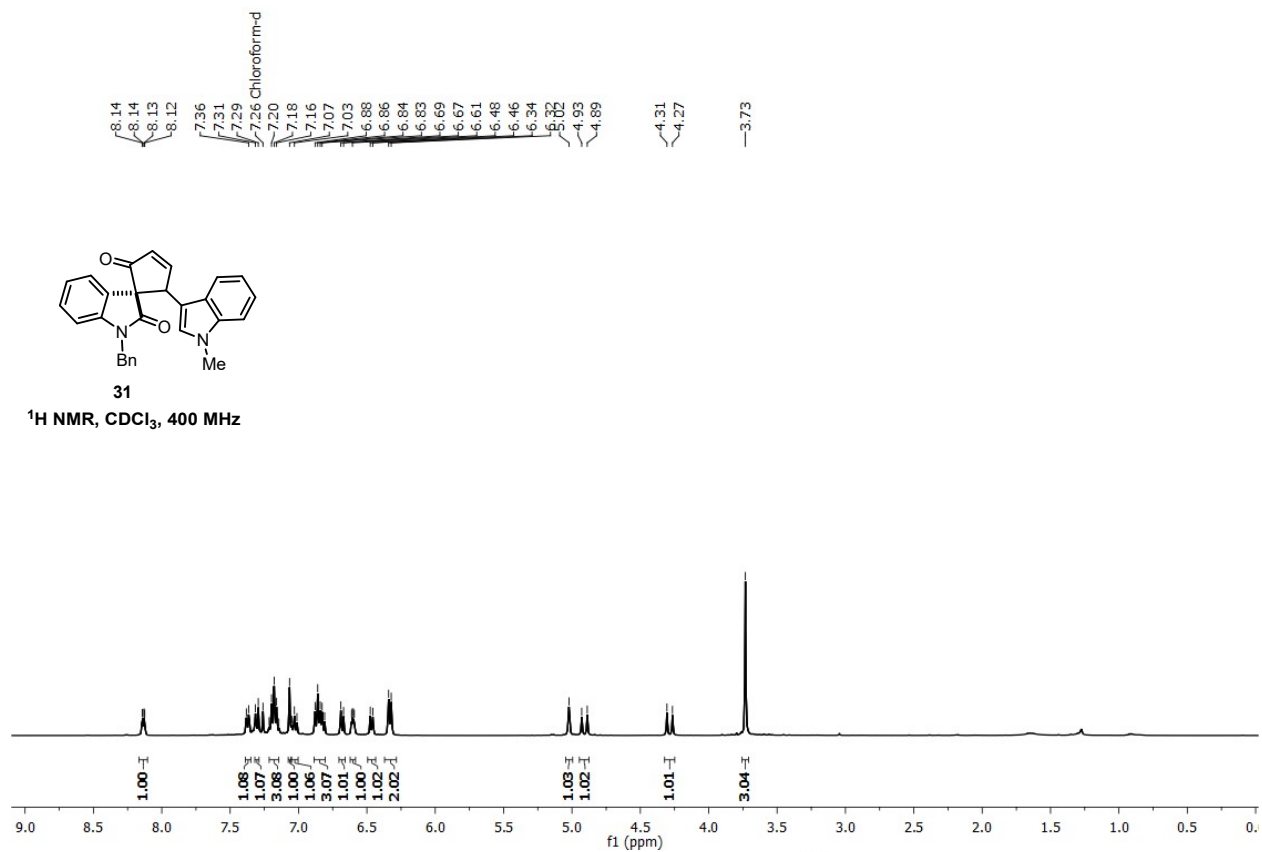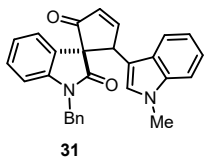

<sup>13</sup>C NMR, CDCl<sub>3</sub>, 100 MHz

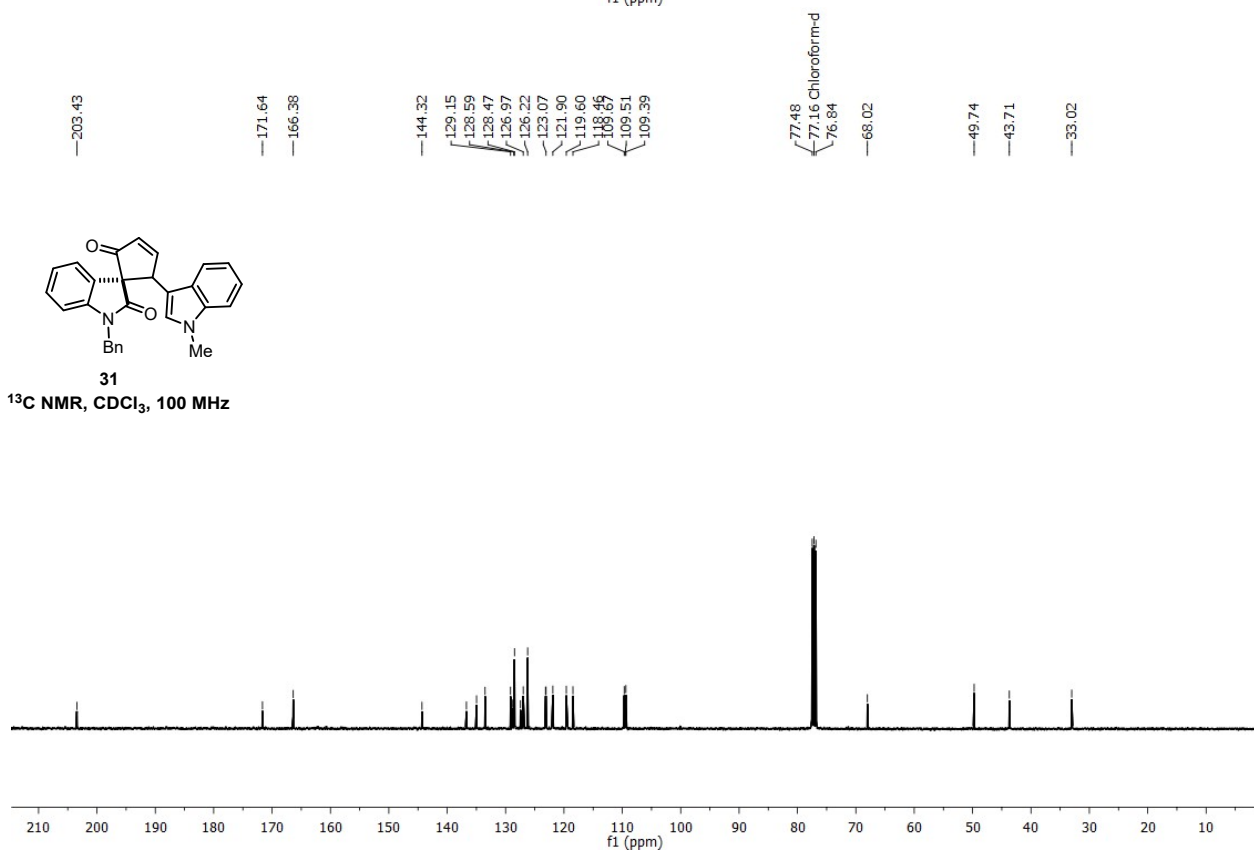

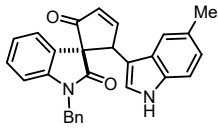

32

<sup>1</sup>H NMR, DMSO-d<sub>6</sub>, 400 MHz

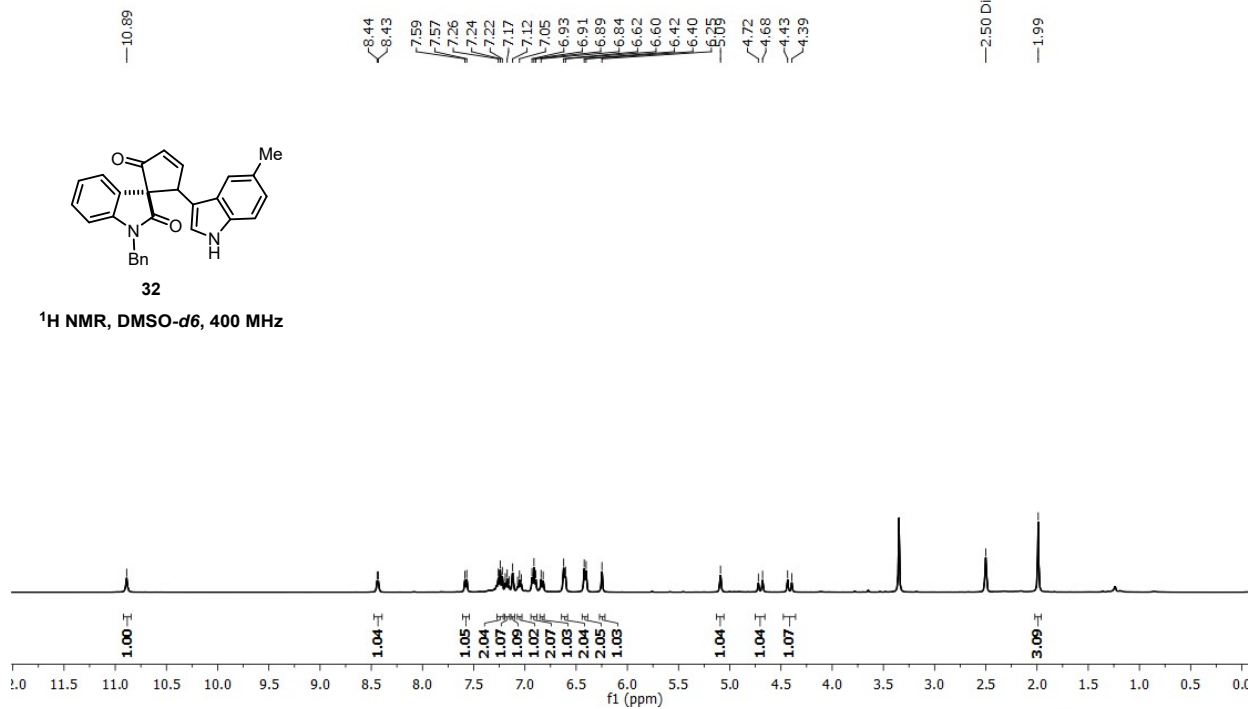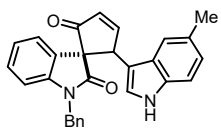

32

<sup>13</sup>C NMR, DMSO-d<sub>6</sub>, 100 MHz

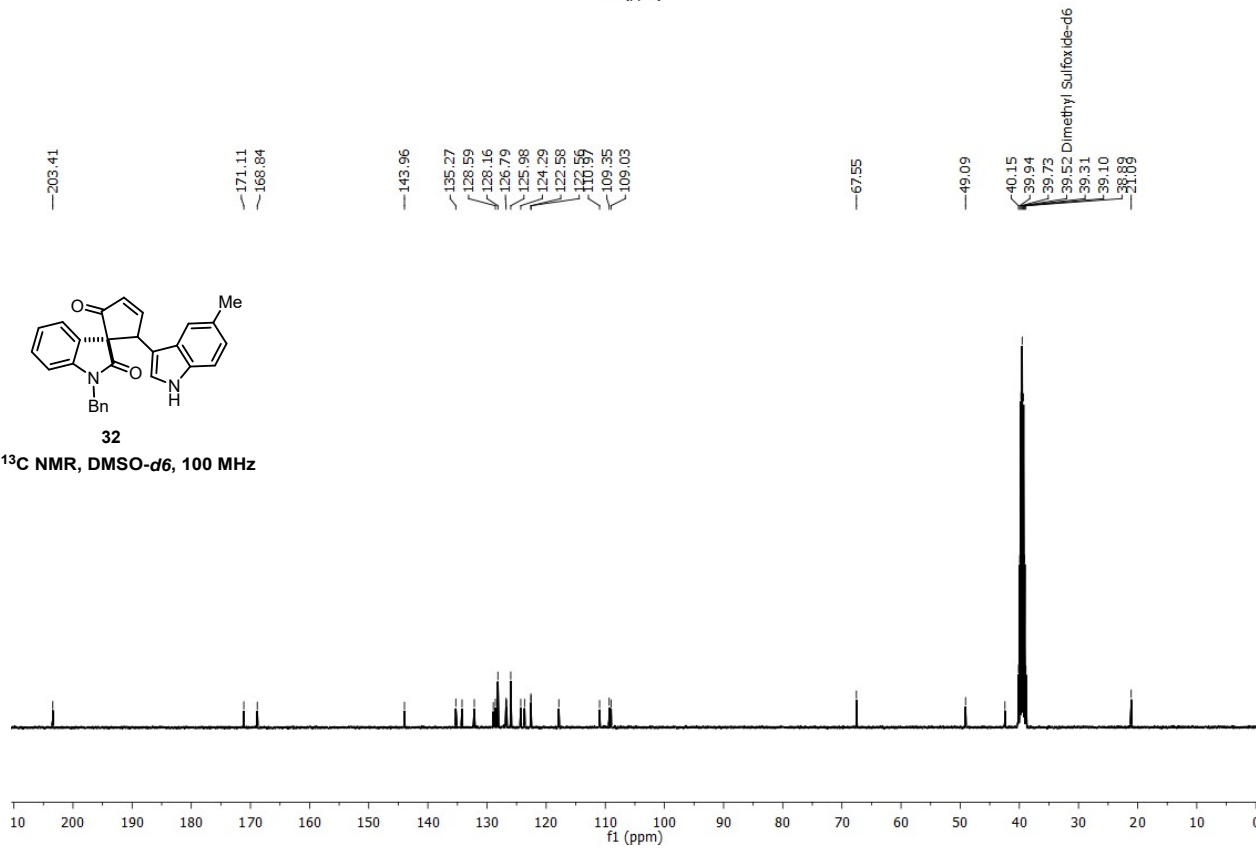

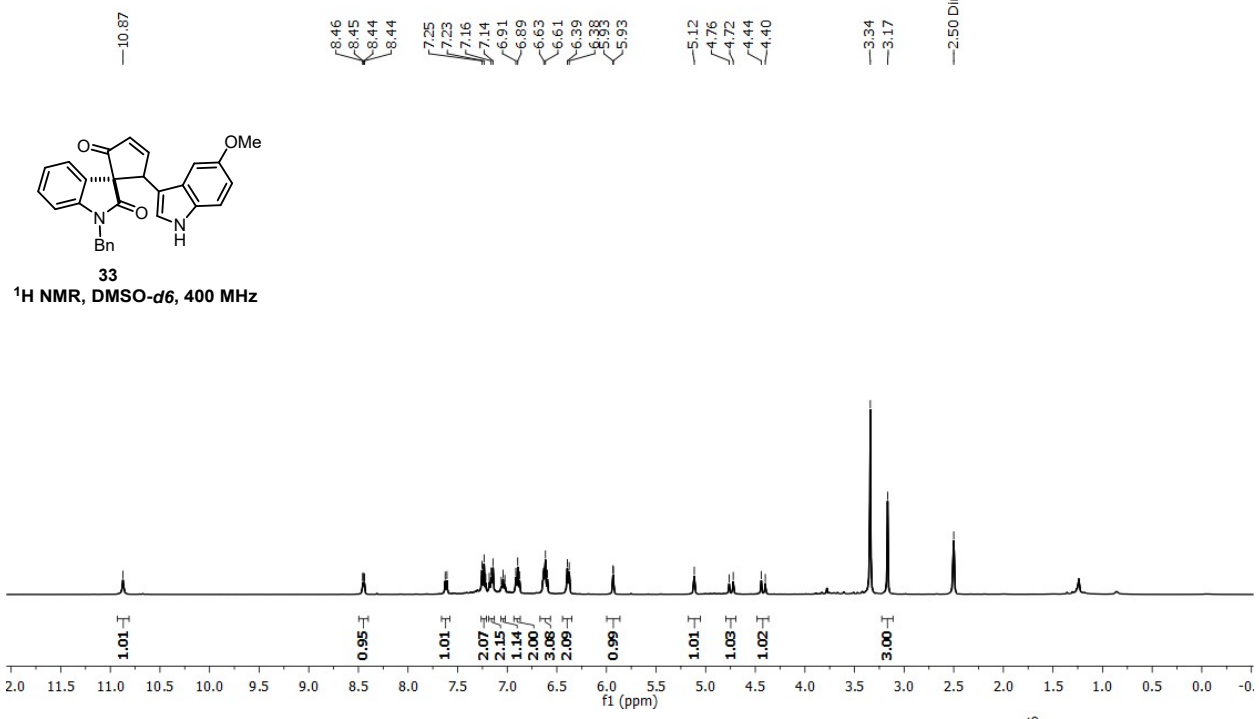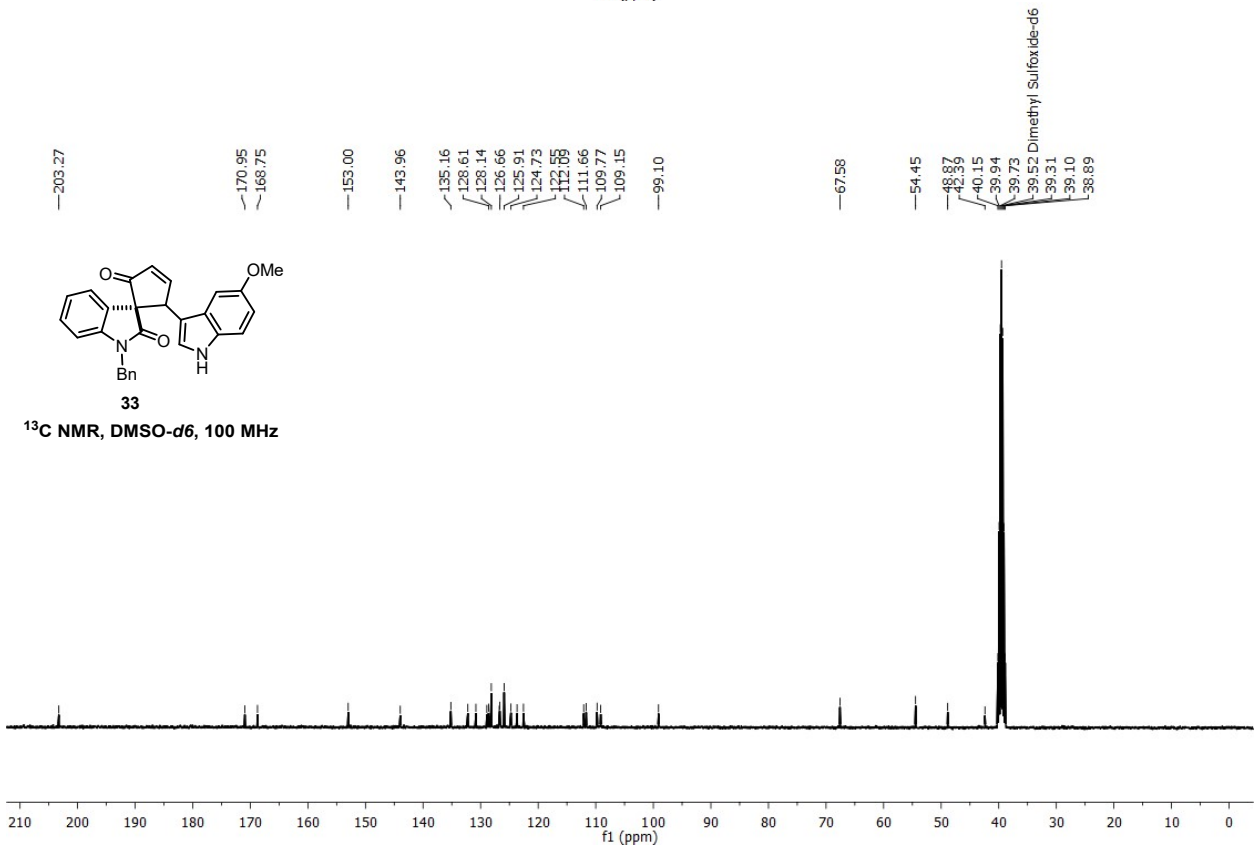

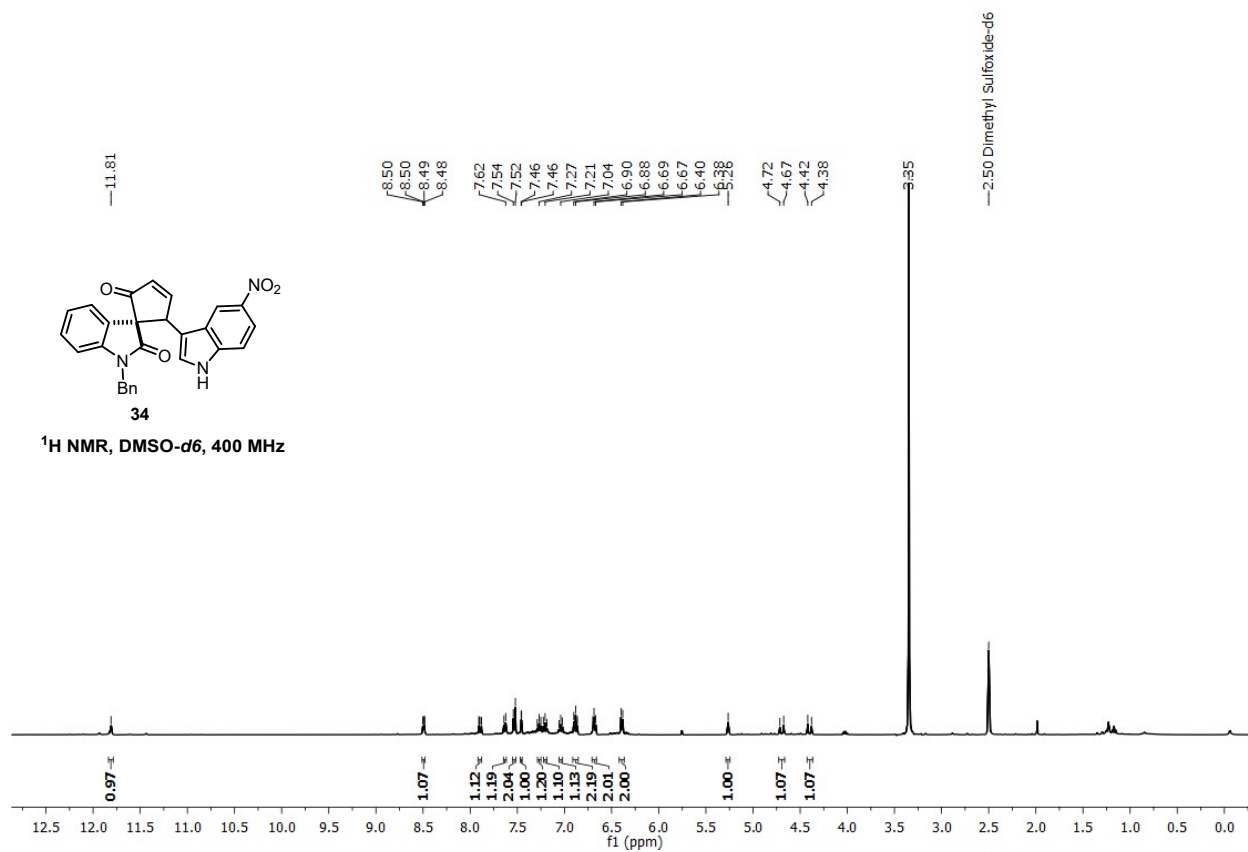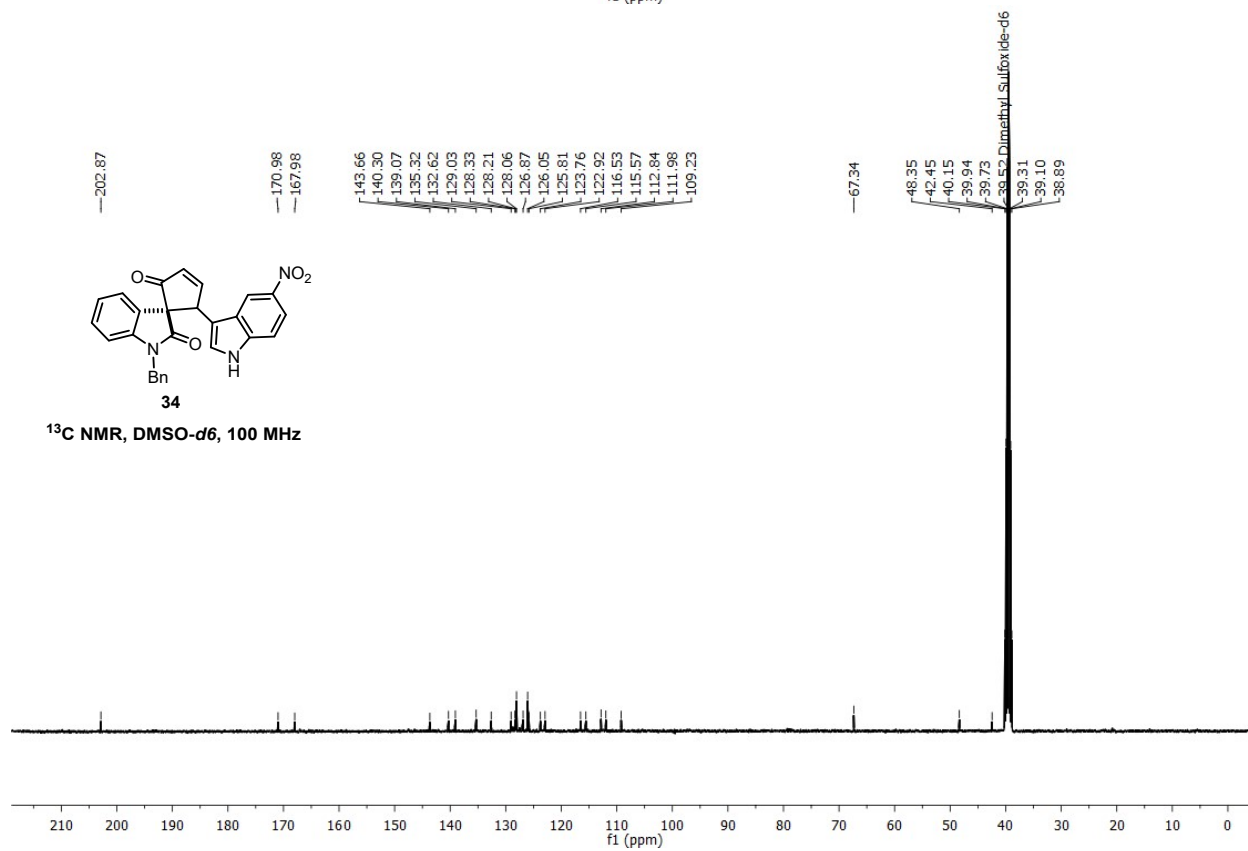

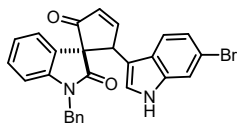

35

<sup>1</sup>H NMR, DMSO-d<sub>6</sub>, 400 MHz

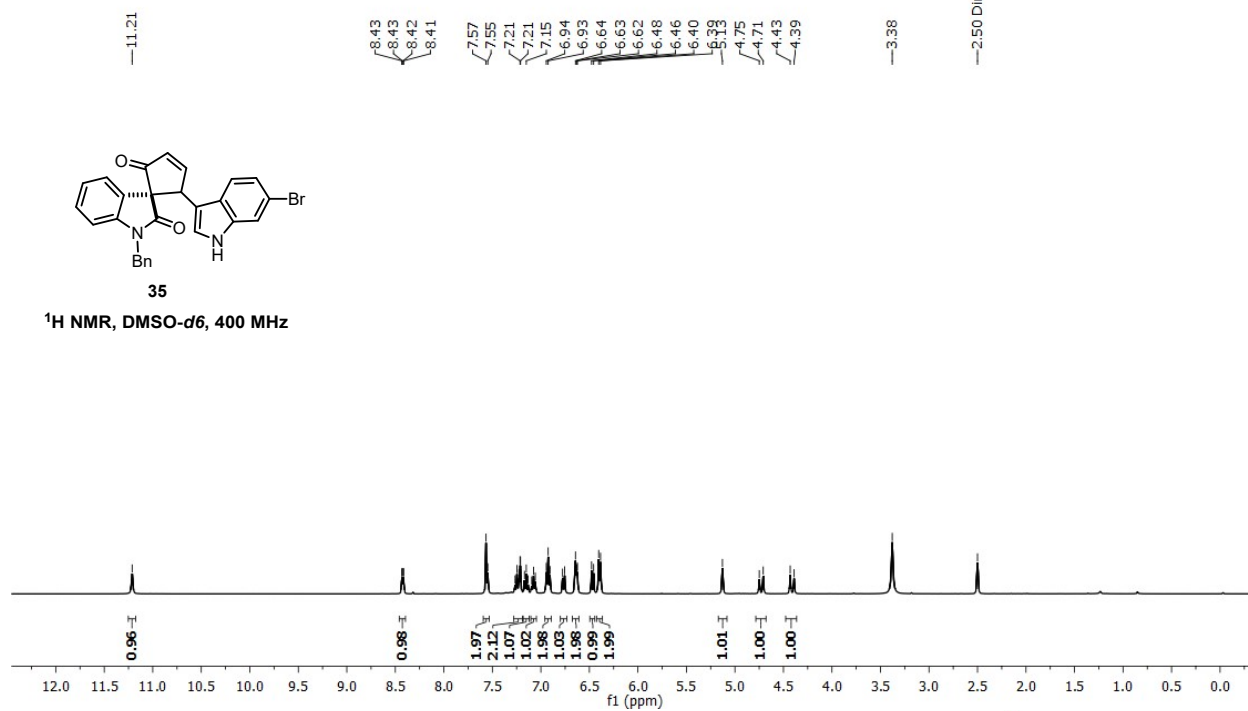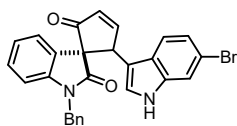

35

<sup>13</sup>C NMR, DMSO-d<sub>6</sub>, 100 MHz

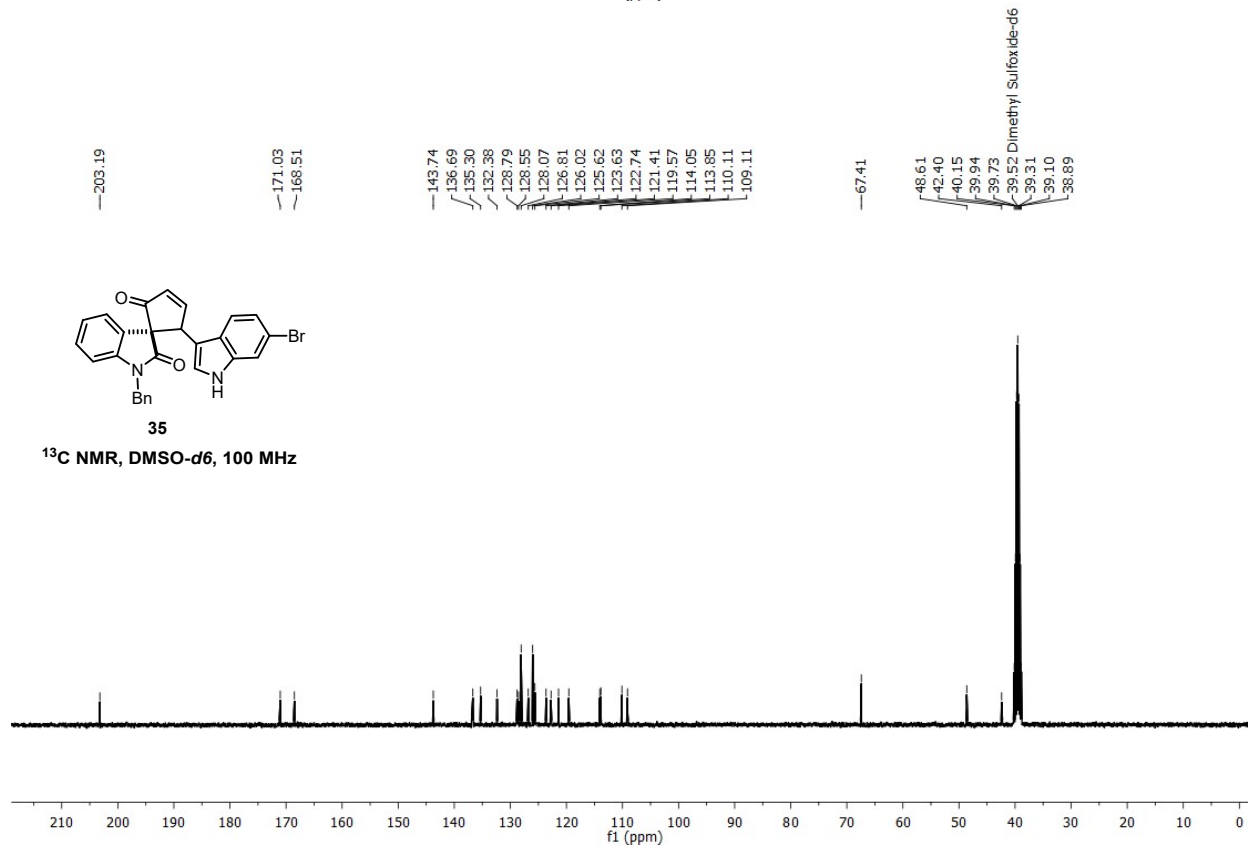

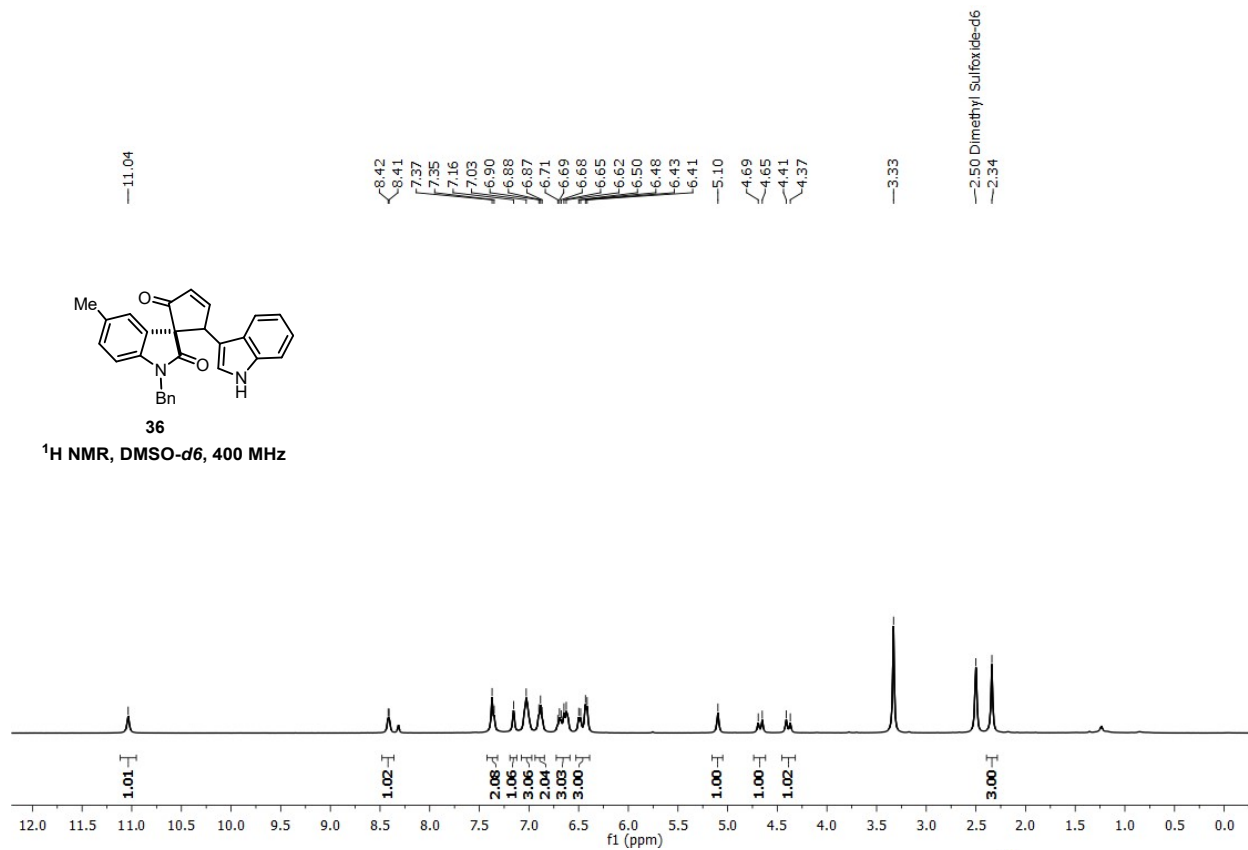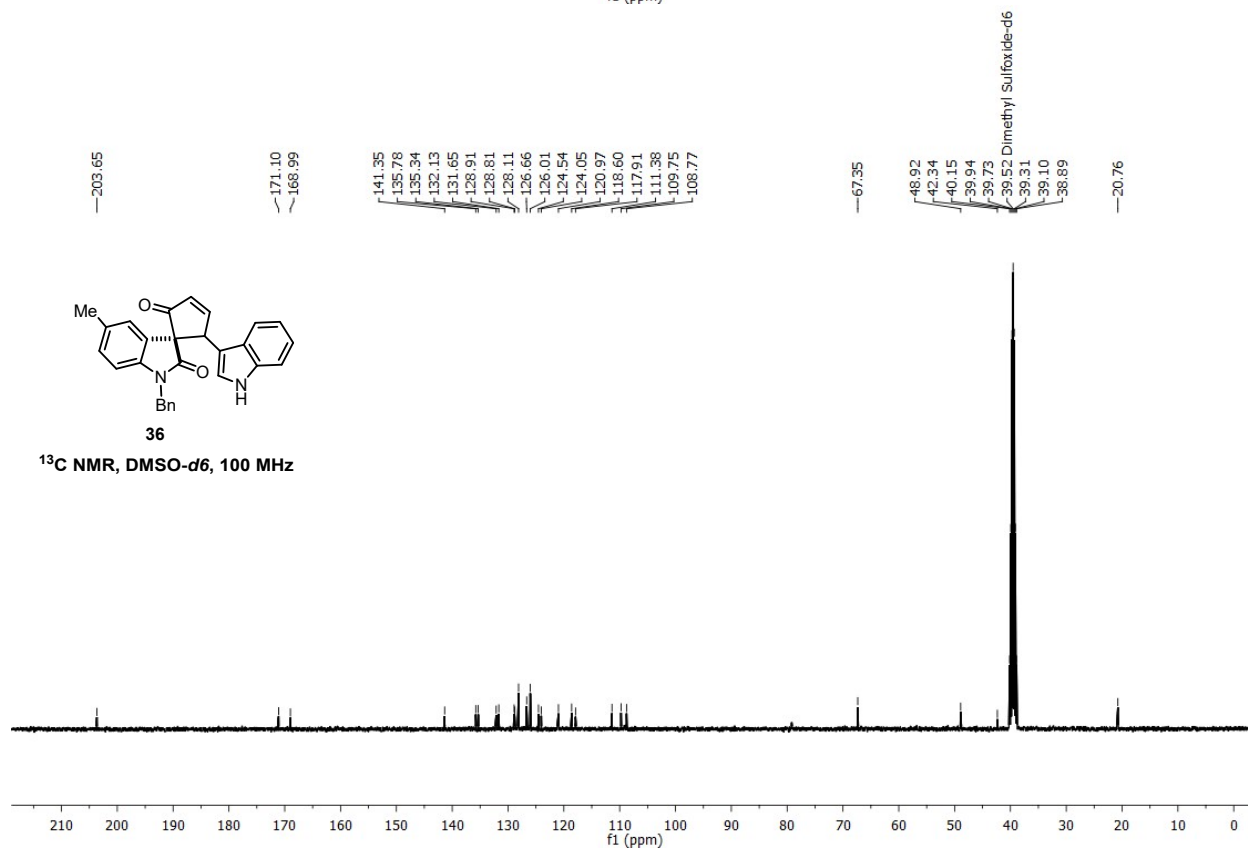

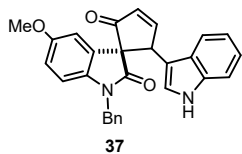

<sup>1</sup>H NMR, DMSO-d<sub>6</sub>, 400 MHz

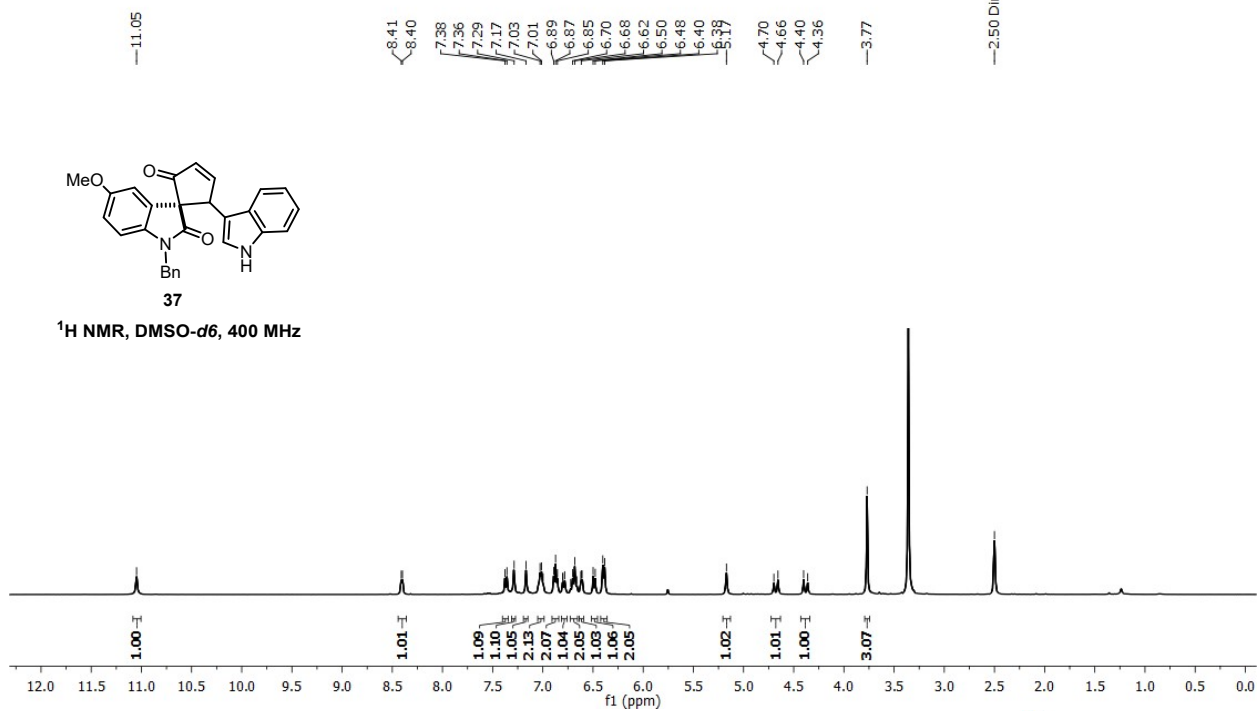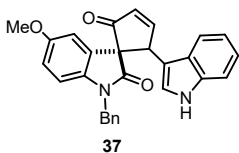

<sup>13</sup>C NMR, DMSO-d<sub>6</sub>, 100 MHz

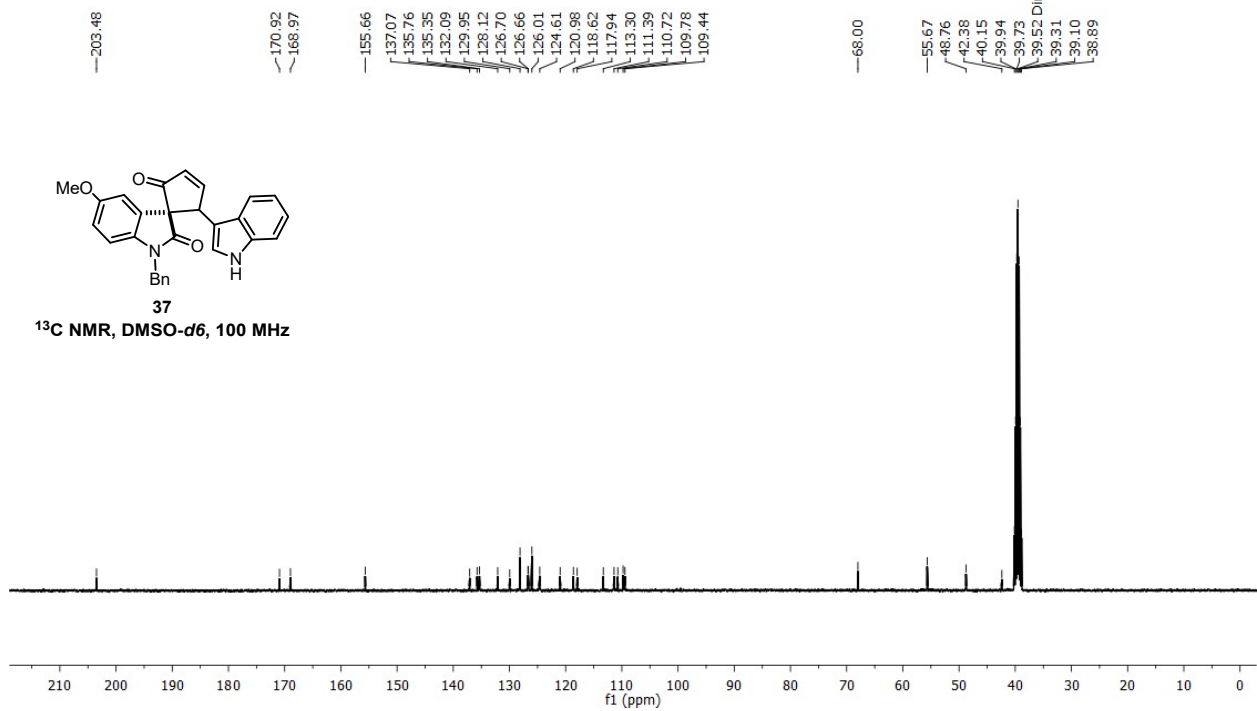



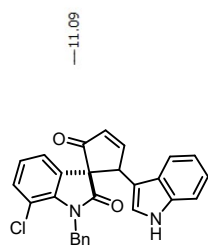

38

<sup>1</sup>H NMR, DMSO-d<sub>6</sub>, 400 MHz

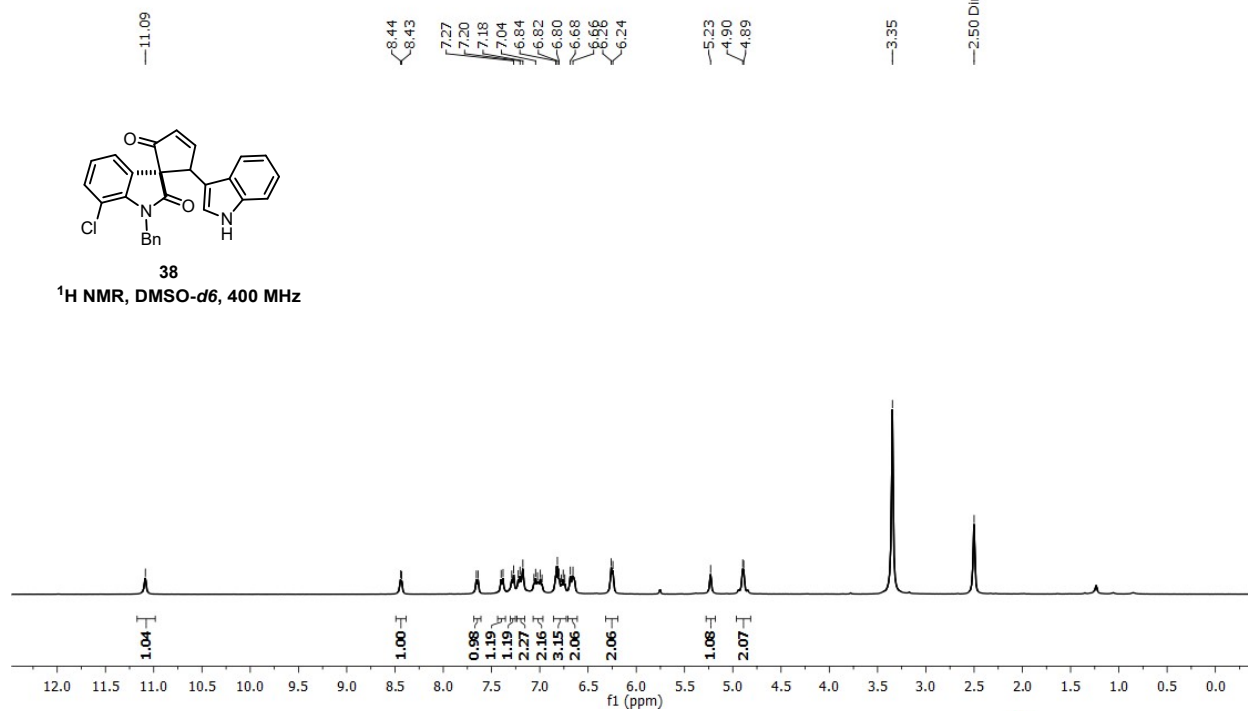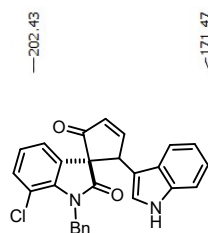

38

<sup>13</sup>C NMR, DMSO-d<sub>6</sub>, 100 MHz

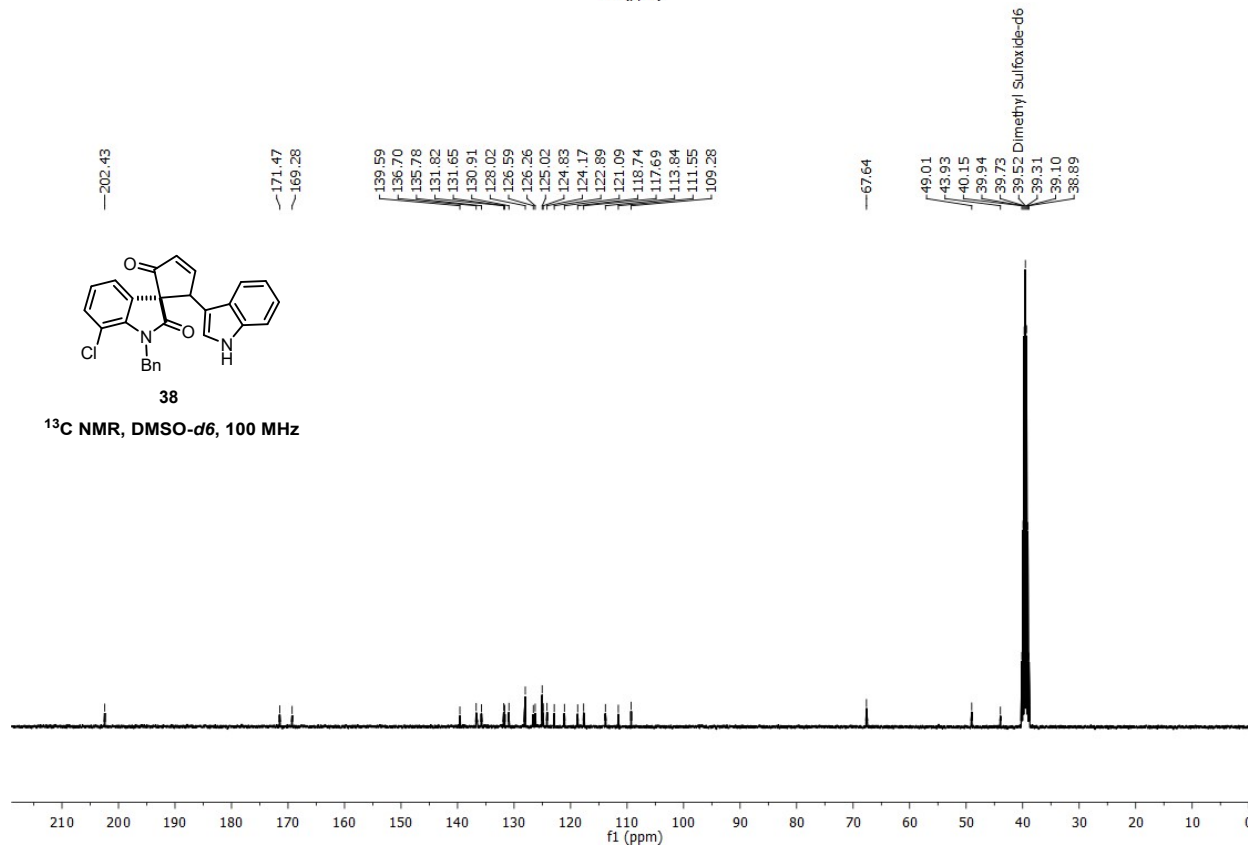

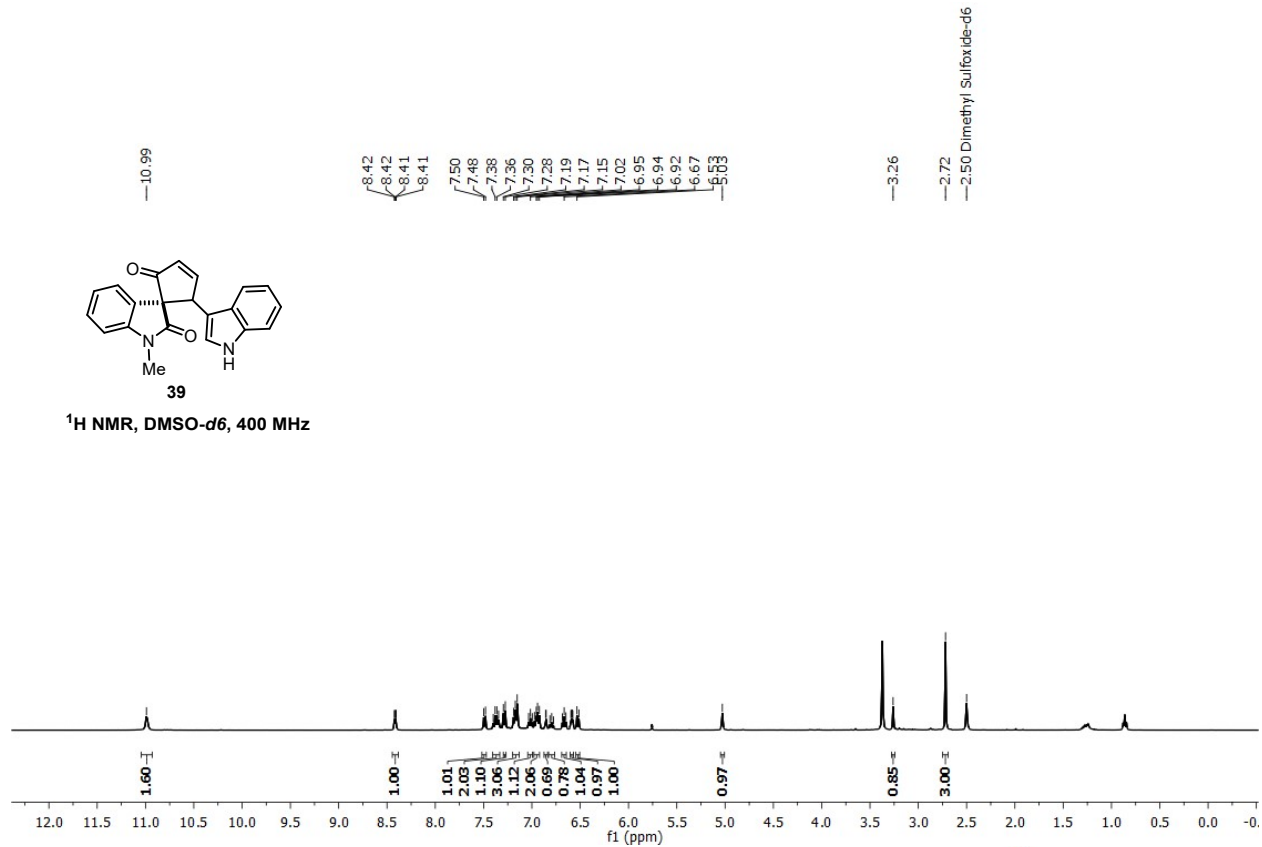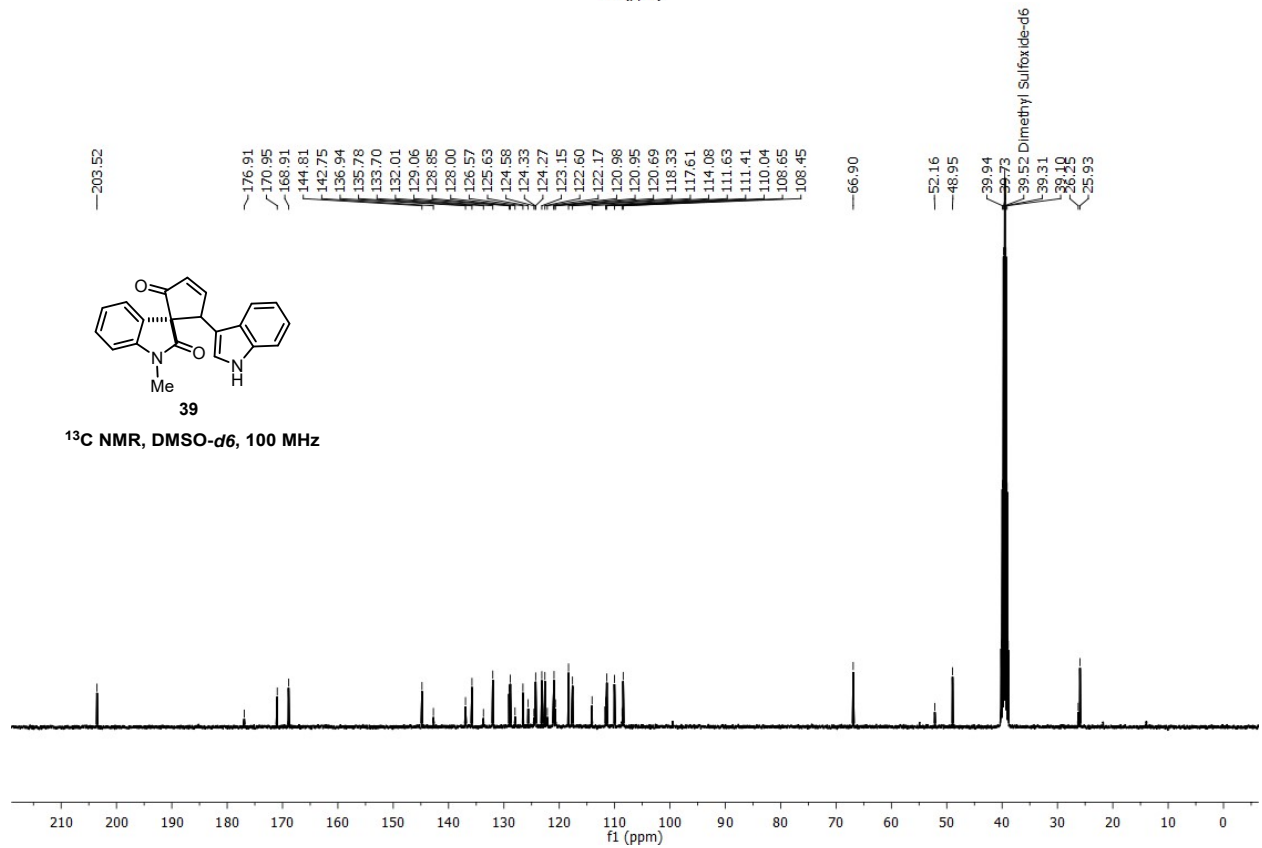

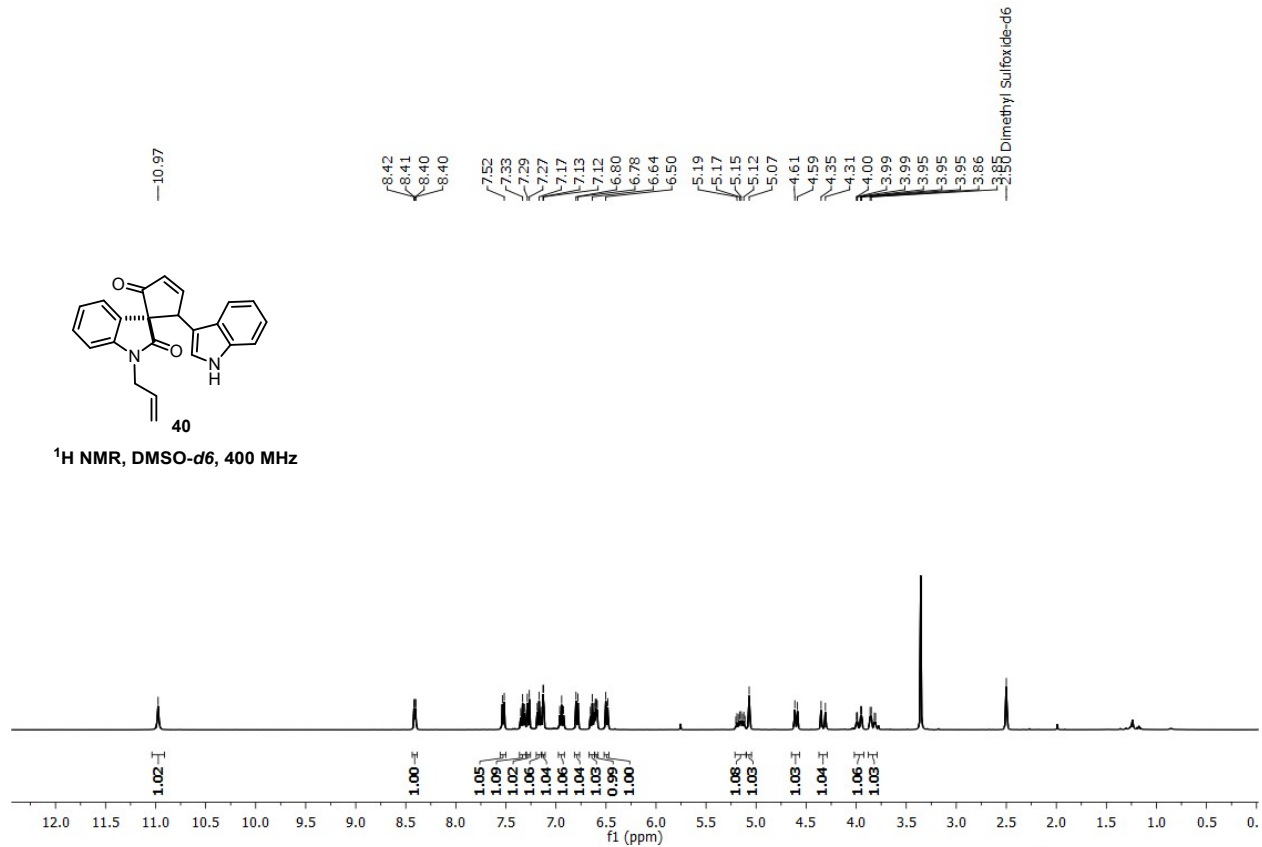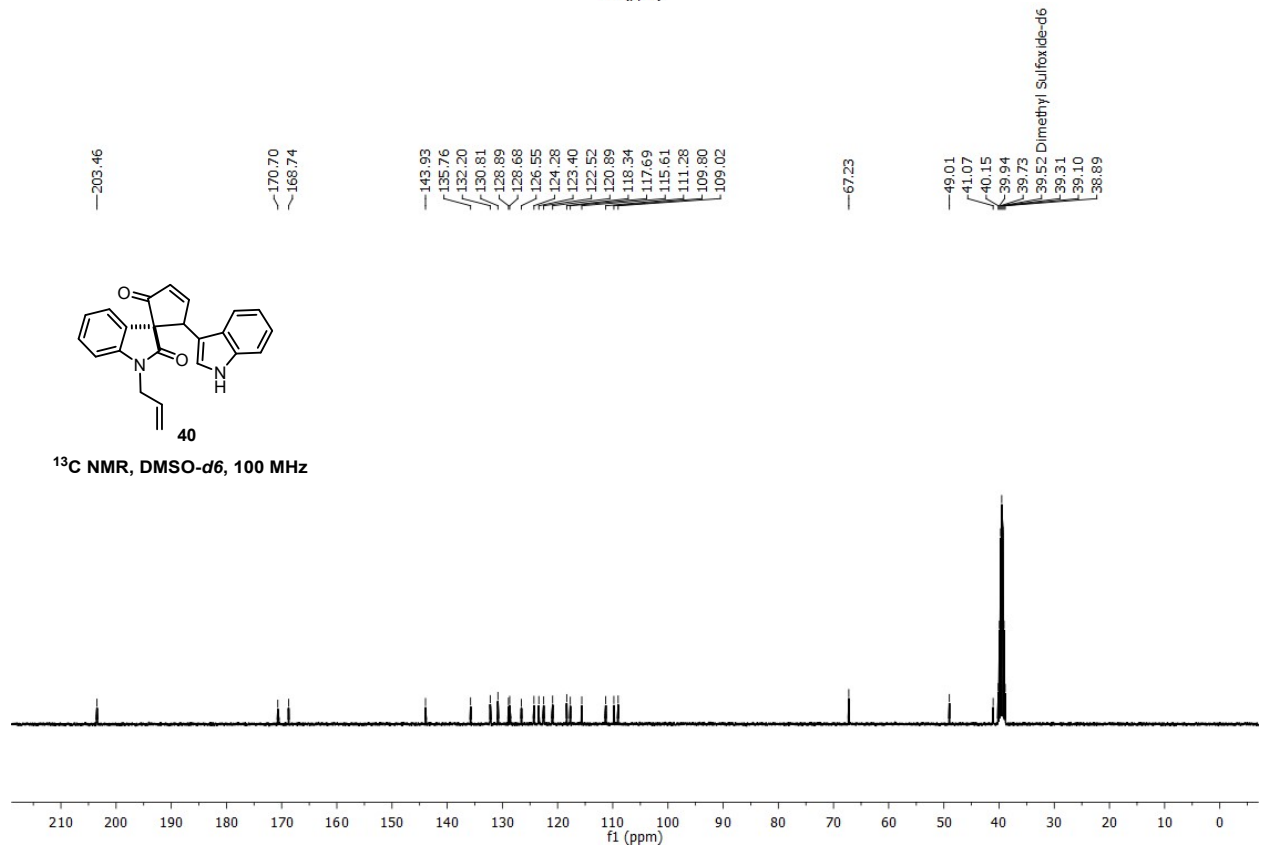

7.26 Chloroform-d  
 7.22  
 7.20  
 7.19  
 7.17  
 7.15  
 7.14  
 7.13  
 7.11  
 7.09  
 7.07  
 7.06  
 7.04  
 7.02  
 7.00  
 6.91  
 6.89  
 6.88  
 6.86  
 6.83  
 6.82  
 6.81  
 6.80  
 6.79  
 6.77  
 6.68  
 6.66  
 6.64  
 6.60  
 6.59  
 6.56  
 6.54  
 6.52  
 6.31  
 6.29  
 6.27  
 5.04  
 5.02  
 4.96  
 4.92  
 4.86  
 4.82  
 4.77  
 4.74  
 4.73  
 4.70  
 4.60  
 4.59  
 2.95  
 2.93  
 2.92  
 2.91  
 2.90  
 2.89  
 2.88  
 2.81  
 2.81  
 2.79  
 2.78  
 2.76  
 2.71  
 2.68  
 2.66  
 2.65  
 2.19

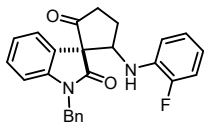

41

<sup>1</sup>H NMR, CDCl<sub>3</sub>, 400 MHz

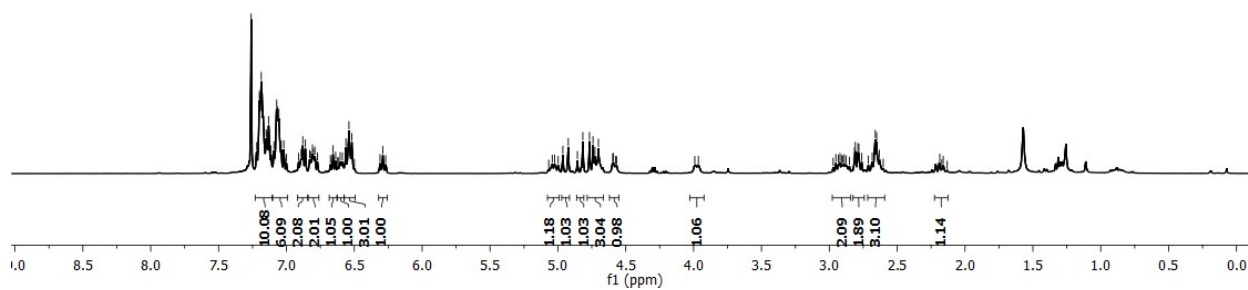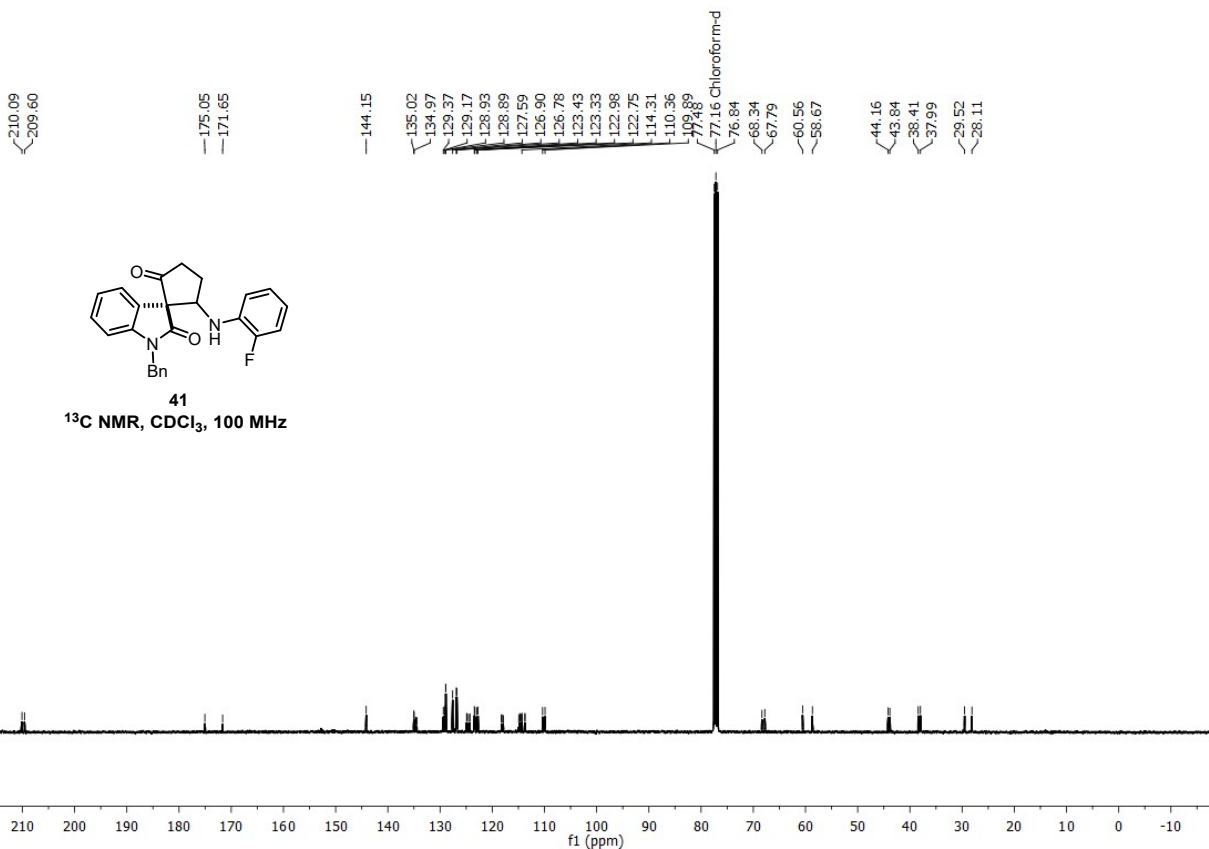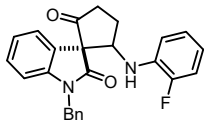

41

<sup>13</sup>C NMR, CDCl<sub>3</sub>, 100 MHz

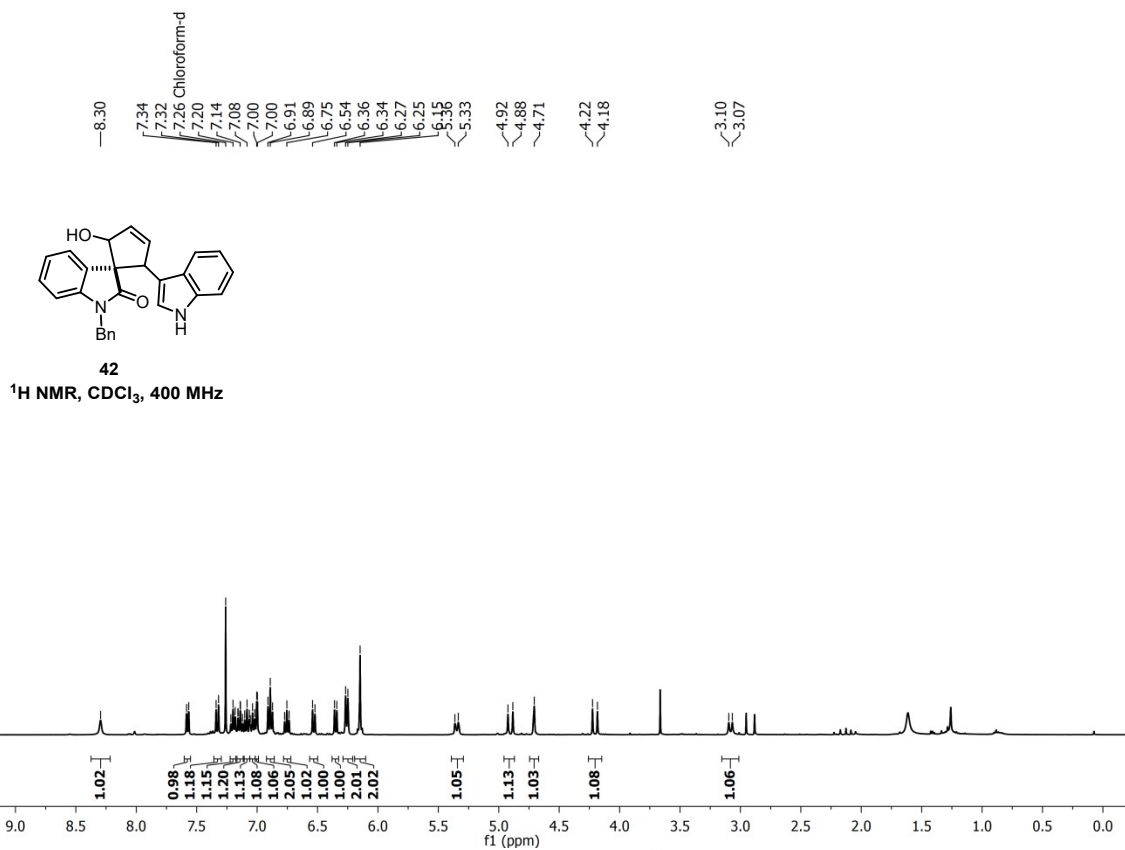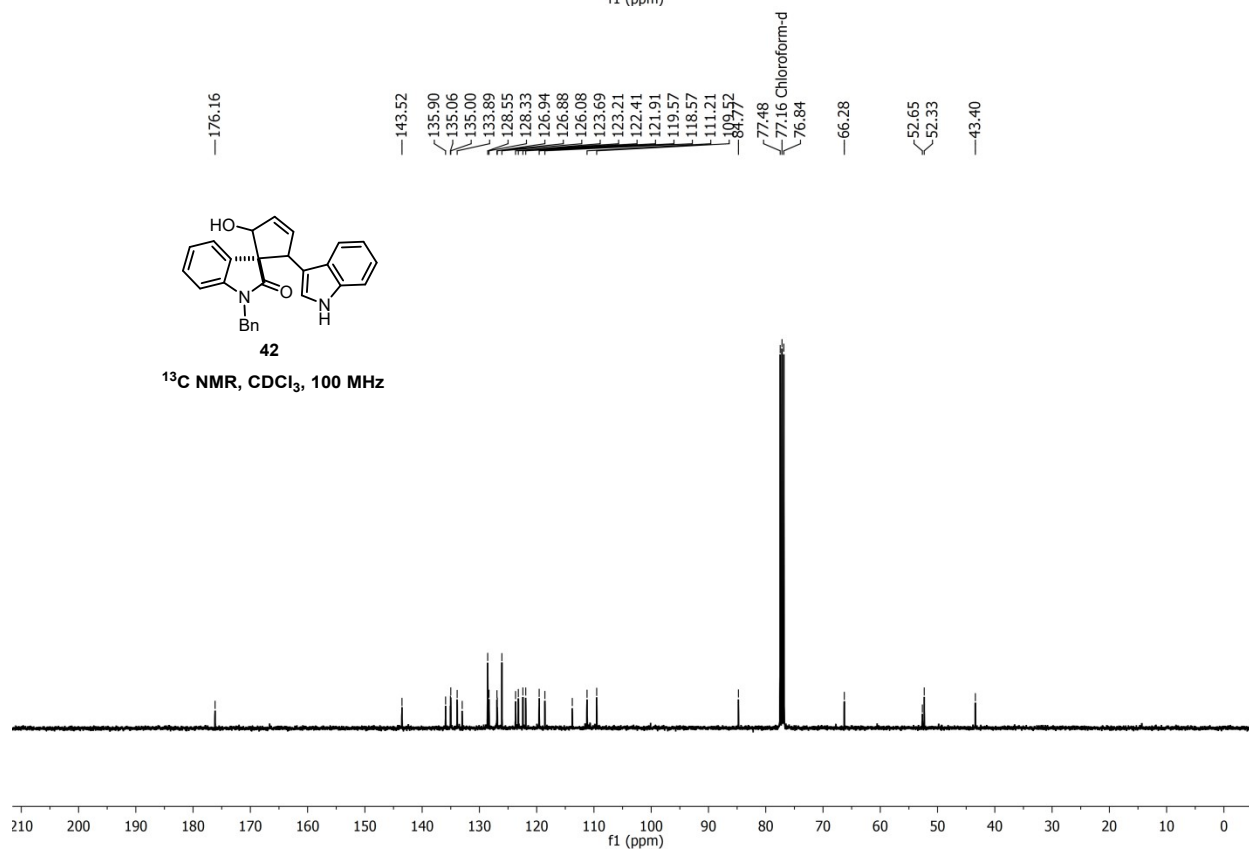

Supplement: d2ob00883a1.pdf [file d2ob00883a1.pdf]
